# Supplementary material for: Variation in albumin glycation rates in birds suggests resistance to relative hyperglycaemia rather than conformity to the pace of life syndrome hypothesis
Source: eLife. 2025 May 19;13:RP103205. doi: 10.7554/eLife.103205 (PMC12088674; doi:10.7554/eLife.103205)
Supplement: Supplementary file 5. [file elife-103205-supp5.xlsx]

## Sheet: Metadata
Data	Individual data	Age+Sex	Species list (see ESM3)
animal=species	animal=species	animal=species	Species=list with all species
	Species=same as animal, to be used as a random factor in models with intraspecific variation (see ESM 6)		Species glucose=list with species including individual glucose values
order=taxonomic order of the species following Birds of the World (see ESM 6)	order=taxonomic order of the species following Birds of the World (see ESM 6)		Species LH=list with species including all life history values
Glycation=species average albumin glycation (rate as a percentage of total albumin)	Glycation=individually measured albumin glycation (rate as a percentage of total albumin)	Glycation=individually measured albumin glycation (rate as a percentage of total albumin)	Species LH individuals=list with species including all life history values and individual glucose values
Glucose=species average plasma glucose levels in mg/dl	Glucose=individually measured plasma glucose levels in mg/dl	Glucose=individually measured plasma glucose levels in mg/dl	Species Age+sex=list with species including sex and age values
logGlucose=log10(Glucose)	logGlucose=log10(Glucose)	logGlucose=log10(Glucose)
Centered_logGlucose=logGlucose-(average logGlucose) to better interpret the intercept of the models	Centered_logGlucose=logGlucose-(average logGlucose) to better interpret the intercept of the models	Centered_logGlucose=logGlucose-(average logGlucose) to better interpret the intercept of the models
Body_mass=species average body mass in grams	Body_mass=species average body mass in grams	Body_mass=species average body mass in grams
logBM=log10(Body_mass)	logBM=log10(Body_mass)	logBM=log10(Body_mass)
Centered_logBM=logBM-(average logBM) to better interpret the intercept of the models	Centered_logBM=logBM-(average logBM) to better interpret the intercept of the models	Centered_logBM=logBM-(average logBM) to better interpret the intercept of the models
Diet=species diet adapted from AVONET's trophic niche using Williams et al. 2014 (see main text)	Diet=species diet adapted from AVONET's trophic niche using Williams et al. 2014 (see main text)
mev=number of individuals measured for albumin glycation rates and included in the calculation of the species average (values under the limit of detection discarded; see main text)
mev_Glu=number of individuals used for species average plasma glucose values calculations. Those in bold correspond to the sample sizes provided by ZIMs for the repported averages (see main text)
clutch_size_n=species average
maximum_longevity_y=species maximum reported lifespan in years		Age=chronological age of the individual in years
clutch_size_n=species average number of eggs per clutch		Sex=male (M) or female (F)
egg_mass_g=species average egg mass in grams		Age_relative=Age/maximum_longevity_y
incubation_d=species average incubation time in days
fledging_age_d=species average age at fledging in days
Clutch_mass=egg_mass_g*clutch_size_n
Developmental_time=incubation_d+fledging_age_d
logML=log10(maximum_longevity_y)
logCM=log10(Clutch_mass)
lodDT=log10(Developmental_time)
ML=Residual maximum lifespan (body mass controlled values; see main text)	ML=Residual maximum lifespan (body mass controlled values; see main text)
CM=Residual clutch mass (body mass controlled values; see main text)	CM=Residual clutch mass (body mass controlled values; see main text)
DT=Residual developmental time (body mass controlled values; see main text)	DT=Residual developmental time (body mass controlled values; see main text)
Method_Glu=technic used to obtain glucose values: "kit" for the values coming from ZIMs database and "glucometer" for the ones measured by our team (see main text)
Lysines=number of lysines exposed in the surface of albumin as used in the analyses (see ESM6)	ID=individual identification code

## Sheet: Data
animal	Species	order	Glycation	Glucose	logGlucose	Centered_logGlucose	Body_mass	logBM	Centered_logBM	Diet	mev	mev_Glu	clutch_size_n	maximum_longevity_y	egg_mass_g	incubation_d	fledging_age_d	Clutch_mass	Developmental_time	logML	logCM	logDT	ML	CM	DT	Method_Glu	Lysines	Provenance
Phoenicopterus_ruber	Phoenicopterus_ruber	Phoenicopteriformes	8.82317	146.2	2.16495	-0.236498	3031.59	3.48167	0.497853	Aquatic predator	8	5	1	66	142	30	72.5	142	102.5	1.81954	2.15229	2.01072	0.354069	-0.598123	-0.0702869	Glucometer	18	Captive
Phoenicopterus_roseus	Phoenicopterus_roseus	Phoenicopteriformes	12.2514	212.044	2.32643	-0.0750207	3031.59	3.48167	0.497853	Aquatic predator	15	387	1	83	142	30	72.5	142	102.5	1.91908	2.15229	2.01072	0.453603	-0.598123	-0.0702869	Kit		Captive
Aythya_baeri	Aythya_baeri	Anseriformes	10.8873	201.667	2.30463	-0.0968117	681.23	2.83329	-0.150524	Herbivore	5	3	8.5	15	43	27		365.5		1.17609	2.56289		-0.173719	0.173639		Glucometer		Captive
Casuarius_casuarius	Casuarius_casuarius	Casuariformes	11.4058	190.605	2.28013	-0.121311	44000	4.64345	1.65964	Frugivore/granivore	1	39	5.66694	61	617	50	315	3496.5	365	1.78533	3.54363	2.56229	0.112602	0.146079	0.204745	Kit		Captive
Dendrocygna_viduata	Dendrocygna_viduata	Anseriformes	14.8558	237	2.37475	-0.0266975	689.99	2.83884	-0.144975	Herbivore	5	5	8	27	36	27	71.5	288	98.5	1.43136	2.45939	1.99344	0.0805639	0.0670531	0.0654369	Glucometer		Captive
Anas_bernieri	Anas_bernieri	Anseriformes	11.846	256	2.40824	0.00679411	378.48	2.57804	-0.405775	Herbivore	3	2	6	23	32.3	27.5	47	193.8	74.5	1.36173	2.28735	1.87216	0.0574525	0.0402867	0.00623476	Glucometer		Captive
Dendrocygna_eytoni	Dendrocygna_eytoni	Anseriformes	14.5618	192.767	2.28503	-0.116413	789.99	2.89762	-0.0861959	Herbivore	4	32	11	19	35	28	60.5	385	88.5	1.27875	2.58546	1.94694	-0.082532	0.16038	0.00495288	Kit		Captive
Branta_hutchinsii	Branta_hutchinsii	Anseriformes	12.3434	182	2.26007	-0.141374	2811.68	3.44897	0.465148	Herbivore	1	1	5.15	42	163	28	50.75	839.45	78.75	1.62325	2.92399	1.89625	0.163608	0.191801	-0.176976	Glucometer		Captive
Anas_platyrhynchos	Anas_platyrhynchos	Anseriformes	12.4265	205.8	2.31345	-0.0880005	843.42	2.92604	-0.0577736	Herbivore	6	5	10.515	29.1	54	26.5	55.5	567.81	82	1.46389	2.7542	1.91381	0.0975371	0.31329	-0.0349419	Glucometer	34	Captive
Dendrocygna_bicolor	Dendrocygna_bicolor	Anseriformes	12.4811	183	2.26245	-0.138995	756.37	2.87873	-0.105083	Omnivore	2	1	10	21	49.05	25.5	63	490.5	88.5	1.32222	2.69064	1.94694	-0.0356969	0.276079	0.0094486	Glucometer		Captive
Aratinga_auricapillus	Aratinga_auricapillus	Psittaciformes	12.4951	222.6	2.34753	-0.0539207	130	2.11394	-0.869874	Omnivore	7	5		20.9						1.32015			0.0986626			Glucometer		Captive
Chen_canagica	Chen_canagica	Anseriformes	12.5958	182.667	2.26166	-0.139787	2136.49	3.3297	0.345883	Omnivore	3	3	4.9	13	122.3	24.5	55	599.27	79.5	1.11394	2.77762	1.90037	-0.324422	0.111862	-0.14447	Glucometer		Captive
Phalacrocorax_campbelli	Phalacrocorax_campbelli	Suliformes	13.1766	171.4	2.23401	-0.167435	2000	3.30103	0.317212	Aquatic predator	5	5	2.5	10.9167	52	29	56	130	85	1.03809	2.11394	1.92942	-0.39516	-0.535846	-0.108594	Glucometer		Wild
Platalea_ajaja	Platalea_ajaja	Pelecaniformes	14.4674	189	2.27646	-0.124984	1490	3.17319	0.189369	Aquatic predator	7	2	3	29	68	23.25	52.5	204	75.75	1.4624	2.30963	1.87938	0.0519539	-0.268947	-0.1282	Glucometer		Captive
Tachymarptis_melba	Tachymarptis_melba	Apodiformes	24.8711	350.449	2.54462	0.143179	100.38	2.00165	-0.98217	Terrestrial carnivore	40	39	2.6	26	6.2	20	53.75	16.12	73.75	1.41497	1.20737	1.86776	0.213522	-0.718635	0.139039	Glucometer		Wild
Sarkidiornis_melanotos	Sarkidiornis_melanotos	Anseriformes	13.9897	202.333	2.30607	-0.0953784	2610	3.41664	0.432823	Herbivore	10	6	10.2504	21.5	64	29	70	656.025	99	1.33244	2.81692	1.99564	-0.121436	0.102733	-0.0698966	Glucometer		Captive
Branta_leucopsis	Branta_leucopsis	Anseriformes	14.8408	208	2.31806	-0.0833825	1683.97	3.22633	0.242517	Herbivore	6	3	4.5	28.1667	104	24.5	42.5	468	67	1.44974	2.67025	1.82607	0.0298102	0.0620636	-0.194159	Glucometer		Captive
Ara_ambiguus	Ara_ambiguus	Psittaciformes	14.0586	268.667	2.42921	0.0277679	1300	3.11394	0.130126	Granivore	7	6	2.4	40		29	77		106	1.60206		2.02531	0.202184		0.0318247	Glucometer		Captive
Procellaria_aequinoctialis	Procellaria_aequinoctialis	Procelariiformes	14.4818	286.6	2.45728	0.0558303	1213	3.08386	0.100043	Aquatic predator	5	5	1	30	124	60	95	124	155	1.47712	2.09342	2.19033	0.0826121	-0.435399	0.204011	Glucometer		Wild
Ara_militaris	Ara_militaris	Psittaciformes	14.5185	270.5	2.43217	0.0307214	1134	3.05461	0.0707955	Frugivore/granivore	4	4	2.7	46						1.66276			0.273466			Glucometer		Captive
Anodorhynchus_hyacinthinus	Anodorhynchus_hyacinthinus	Psittaciformes	14.5689	267	2.42651	0.0250654	1331	3.12418	0.140361	Frugivore/granivore	3	2	2.2	43		28.5	107.5		136	1.63347		2.13354	0.231767		0.137622	Glucometer		Captive
Zenaida_graysoni	Zenaida_graysoni	Columbiformes	14.733	306.265	2.4861	0.0846518	192	2.2833	-0.700516	Omnivore	1	42	2	15		15.5	17		32.5	1.17609		1.51188	-0.0756045		-0.283881	Glucometer		Captive
Turdus_merula	Turdus_merula	Passeriformes	15.009	302.4	2.48058	0.0791359	102.73	2.0117	-0.97212	Omnivore	5	5	4	21.8333	7.2	13.5	13.5	28.8	27	1.33912	1.45939	1.43136	0.135876	-0.472205	-0.299751	Glucometer		Wild
Aptenodytes_patagonicus	Aptenodytes_patagonicus	Sphenisciformes	15.0151	219.2	2.34084	-0.0606053	11731.1	4.06934	1.08552	Aquatic predator	5	5	1	27	306	53.5	345	306	398.5	1.43136	2.48572	2.60043	-0.138946	-0.592036	0.379536	Glucometer	35	Wild
Lophotibis_cristata	Lophotibis_cristata	Pelecaniformes	15.2167	219	2.34044	-0.0610017	583	2.76567	-0.218149	Terrestrial carnivore	2	1	3	24						1.38021			0.042465			Glucometer		Captive
Pagodroma_nivea	Pagodroma_nivea	Procelariiformes	15.2309	234.5	2.37014	-0.031303	268	2.42813	-0.555683	Aquatic predator	4	16	1	46	48	45	46	48	91	1.68124	1.68124	1.95904	0.385225	-0.482323	0.128802	Glucometer		Wild
Cygnus_atratus	Cygnus_atratus	Anseriformes	15.5231	168.5	2.2266	-0.174846	5623.16	3.74998	0.766163	Herbivore	4	4	5.5	40	267	39	160	1468.5	199	1.60206	3.16687	2.29885	0.0887205	0.267007	0.153977	Glucometer	35	Captive
Sylvia_atricapilla	Sylvia_atricapilla	Passeriformes	15.5929	323.6	2.51001	0.108563	16.7	1.22272	-1.7611	Omnivore	5	5	4.5	14.0833	2.19	11	11	9.855	22	1.14871	0.993657	1.34242	0.0862094	-0.498458	-0.200892	Glucometer		Wild
Eudyptes_chrysolophus	Eudyptes_chrysolophus	Sphenisciformes	15.9229	197.2	2.29491	-0.106539	4485.08	3.65177	0.667953	Aquatic predator	5	5	2	20	142	36.5	65	284	101.5	1.30103	2.45332	2.00647	-0.19479	-0.391843	-0.115033	Glucometer	34	Wild
Cacatua_moluccensis	Cacatua_moluccensis	Psittaciformes	16.1214	259.064	2.41341	0.0119618	834.99	2.92168	-0.0621363	Granivore	2	55	2	69	29.85	30	98	59.7	128	1.83885	1.77597	2.10721	0.473271	-0.662508	0.159493	Kit		Captive
Eudocimus_ruber	Eudocimus_ruber	Pelecaniformes	16.1574	244.5	2.38828	-0.013167	660.08	2.8196	-0.164221	Aquatic predator	6	6	2	43	43	23	38.5	86	61.5	1.63347	1.9345	1.78888	0.286102	-0.44712	-0.134543	Glucometer		Captive
Sylvia_borin	Sylvia_borin	Passeriformes	13.0367	340.6	2.53224	0.130799	18.2	1.26007	-1.72375	Omnivore	5	5	4.5	24	2.23	11.5	10.5	10.035	22	1.38021	1.00152	1.34242	0.311051	-0.511405	-0.209784	Glucometer		Wild
Sylvia_communis	Sylvia_communis	Passeriformes	16.3231	328.6	2.51667	0.115222	15.1	1.17898	-1.80484	Terrestrial carnivore	5	5	4.5	12.1667	1.78	11	11	8.01	22	1.08517	0.903633	1.34242	0.0304783	-0.564118	-0.190481	Glucometer		Wild
Anser_anser	Anser_anser	Anseriformes	16.4082	174.333	2.24138	-0.160065	3302.41	3.51883	0.535013	Herbivore	3	3	5	31	165	27.5	55	825	82.5	1.49136	2.91645	1.91645	0.0192574	0.145343	-0.173402	Glucometer		Captive
Anser_indicus	Anser_indicus	Anseriformes	16.4123	210	2.32222	-0.0792266	2212.55	3.34489	0.361076	Herbivore	8	7	5		141	29	57.75	705	86.75		2.84819	1.93827		0.173967	-0.110184	Glucometer	35.5	Captive
Lophura_edwardsi	Lophura_edwardsi	Galliformes	16.7309	280	2.44716	0.0457122	1090.96	3.03781	0.0539913	Omnivore	2	1	5.3	26		21.5				1.41497			0.0286795			Glucometer		Captive
Erithacus_rubecula	Erithacus_rubecula	Passeriformes	24.4136	331.4	2.52035	0.118907	17.7	1.24797	-1.73584	Omnivore	5	5	5.17	19.3333	2.45	14	13.5	12.6665	27.5	1.28631	1.10266	1.43933	0.219305	-0.403527	-0.109994	Glucometer		Wild
Bucorvus_abyssinicus	Bucorvus_abyssinicus	Bucerotiformes	16.9529	339.5	2.53084	0.129394	4000	3.60206	0.618242	Omnivore	4	4	2	70	95.3	39	73	190.6	112	1.8451	2.28012	2.04922	0.358146	-0.537348	-0.0604489	Glucometer		Captive
Burhinus_superciliaris	Burhinus_superciliaris	Charadriiformes	17.0013	264.289	2.42208	0.020633	480	2.68124	-0.302576	Terrestrial carnivore	1	47	2	24						1.38021			0.0575262			Kit		Captive
Macronectes_halli	Macronectes_halli	Procelariiformes	10.3644	248.8	2.39585	-0.00559548	4206.3	3.6239	0.640083	Omnivore	5	5	1	35.4	251.2	59	114	251.2	173	1.549	2.40002	2.23805	0.0581555	-0.429617	0.123181	Glucometer		Wild
Numida_meleagris	Numida_meleagris	Galliformes	17.3031	358.25	2.55419	0.15274	1299	3.11361	0.129792	Omnivore	5	4	8.75	31	39.4	27.5	28	344.75	55.5	1.49136	2.5375	1.74429	0.0915457	-0.00788714	-0.249109	Glucometer	33	Captive
Leptoptilos_crumeniferus	Leptoptilos_crumeniferus	Ciconiiformes	17.4347	264.6	2.42259	0.021144	6067.87	3.78304	0.799219	Omnivore	5	5	2.2	44.7	138	30	105	303.6	135	1.65031	2.4823	2.13033	0.131071	-0.435978	-0.0224107	Glucometer		Captive
Balearica_pavonina	Balearica_pavonina	Gruiformes	17.6834	178.5	2.25164	-0.149808	3590	3.55509	0.571277	Omnivore	2	2	2.5	17.189	146.5	29.5	63	366.25	92.5	1.23525	2.56378	1.96614	-0.243322	-0.227533	-0.132346	Glucometer		Captive
Ara_glaucogularis	Ara_glaucogularis	Psittaciformes	17.9258	248.714	2.3957	-0.00574513	783.99	2.89431	-0.089507	Frugivore/granivore	7	7	2.4	33		27	85		112	1.51851		2.04922	0.157819		0.108016	Glucometer		Captive
Ortalis_canicollis	Ortalis_canicollis	Galliformes	13.4604	329	2.5172	0.11575	539	2.73159	-0.252229	Omnivore	4	3	4													Glucometer		Captive
Nesoenas_mayeri	Nesoenas_mayeri	Columbiformes	14.5278	505	2.70329	0.301846	302.76	2.4811	-0.502719	Omnivore	5	1	2	18		14	20		34	1.25527		1.53148	-0.0317087		-0.311367	Glucometer		Captive
Acryllium_vulturinum	Acryllium_vulturinum	Galliformes	18.2679	194	2.2878	-0.113644	1330	3.12385	0.140034	Omnivore	4	1	10	19	49	27.5	14	490	41.5	1.27875	2.6902	1.61805	-0.12289	0.139099	-0.377792	Glucometer		Captive
Pelecanus_onocrotalus	Pelecanus_onocrotalus	Pelecaniformes	20.3828	286.4	2.45697	0.0555272	9322.31	3.96952	0.985706	Aquatic predator	5	5	2	51	180	32.5	72.5	360	105	1.70757	2.5563	2.02119	0.155066	-0.465856	-0.175944	Glucometer		Captive
Sterna_nilotica	Sterna_nilotica	Charadriiformes	18.5776	392.333	2.59366	0.192209	218.25	2.33895	-0.644863	Omnivore	6	6	3	18.0833	30.5	22.25	31.5	91.5	53.75	1.25728	1.96142	1.73038	-0.00434534	-0.152467	-0.0786331	Glucometer		Wild
Larus_dominicanus	Larus_dominicanus	Charadriiformes	18.6712	328.2	2.51614	0.114693	952.43	2.97883	-0.00498446	Omnivore	5	5	2.35	27	87.615	28	50	205.895	78	1.43136	2.31365	1.89209	0.0555907	-0.156671	-0.0692264	Glucometer		Wild
Leucopsar_rothschildi	Leucopsar_rothschildi	Passeriformes	18.8879	488	2.68842	0.286974	91.3	1.96047	-1.02335	Omnivore	2	1	3	30	7.2	13	23	21.6	36	1.47712	1.33445	1.5563	0.283016	-0.568609	-0.162619	Glucometer		Captive
Lophophorus_impejanus	Lophophorus_impejanus	Galliformes	19.1295	211	2.32428	-0.0771634	2066.51	3.31524	0.33142	Omnivore	2	2	5.5		69.2	27.5		380.6			2.58047			-0.0772349		Glucometer		Captive
Pygoscelis_papua	Pygoscelis_papua	Sphenisciformes	19.2532	195.4	2.29092	-0.110521	5932.95	3.77327	0.789453	Aquatic predator	5	5	2	41	138	37	82.5	276	119.5	1.61278	2.44091	2.07737	0.0952896	-0.471931	-0.073052	Glucometer	33	Wild
Chionis_minor	Chionis_minor	Charadriiformes	21.2842	210.2	2.32263	-0.0788131	493.96	2.69369	-0.290126	Omnivore	5	5	2.295	14	43.1	29	55	98.9145	84	1.14613	1.99526	1.92428	-0.178778	-0.316227	0.03083	Glucometer		Wild
Mycteria_ibis	Mycteria_ibis	Ciconiiformes	20.851	266	2.42488	0.0234358	2155.55	3.33356	0.349741	Omnivore	2	4	2.75	19.1	77	30	55	211.75	85	1.28103	2.32582	1.92942	-0.15802	-0.342085	-0.116337	Glucometer		Captive
Musophaga_rossae	Musophaga_rossae	Musophagiformes	19.6577	262.848	2.4197	0.0182582	361.42	2.55801	-0.425805	Frugivore/granivore	2	101	1.75	28	55	25	28.5	96.25	53.5	1.44716	1.9834	1.72835	0.146456	-0.252509	-0.1328	Kit		Captive
Bubo_bubo	Bubo_bubo	Strigiformes	26.6096	331.847	2.52094	0.119492	2668.51	3.42627	0.442451	Terrestrial carnivore	1		2.25	68	71.15	35	55	160.088	90	1.83251	2.20436	1.95424	0.376917	-0.515194	-0.113581	Kit	35	Captive
Acrocephalus_scirpaceus	Acrocephalus_scirpaceus	Passeriformes	19.9999	332.5	2.52179	0.120346	12.3	1.08991	-1.89391	Terrestrial carnivore	5	4	3.9	19.0833	1.67	11.5	12	6.513	23.5	1.28065	0.813781	1.37107	0.241851	-0.604354	-0.140634	Glucometer		Wild
Caloenas_nicobarica	Caloenas_nicobarica	Columbiformes	20.616	245	2.38917	-0.0122798	537.86	2.73067	-0.253148	Omnivore	5	3	1	38	27.8		90	27.8		1.57978	1.44404		0.248281	-0.888039		Glucometer		Captive
Aegypius_monachus	Aegypius_monachus	Accipitriformes	20.5546	279	2.4456	0.0441583	9320.55	3.96944	0.985624	Terrestrial carnivore	3	3	1	43	243	53.5	112.5	243	166	1.63347	2.38561	2.22011	0.0809789	-0.636506	0.0229939	Glucometer		Captive
Vanellus_miles	Vanellus_miles	Charadriiformes	20.5715	294.375	2.4689	0.0674549	387	2.58771	-0.396107	Terrestrial carnivore	2	98	4	26	26.7	30	49.5	106.8	79.5	1.41497	2.02857	1.90037	0.108973	-0.223881	0.0321443	Kit		Captive
Limosa_limosa	Limosa_limosa	Charadriiformes	20.737	286.5	2.45712	0.0556788	288.37	2.45995	-0.523867	Aquatic predator	2	6	3.95	29.75	39	23.5	27.5	154.05	51	1.47349	2.18766	1.70757	0.190278	0.00637547	-0.130242	Glucometer		Wild
Catharacta_antarctica	Catharacta_antarctica	Charadriiformes	21.1673	261	2.41664	0.0151946	1650	3.21748	0.233666	Aquatic predator	16	5	2	34.5	101.7	29	44	203.4	73	1.53782	2.30835	1.86332	0.119473	-0.294901	-0.154804	Glucometer		Wild
Pelecanus_crispus	Pelecanus_crispus	Pelecaniformes	21.2468	203	2.3075	-0.0939498	9512.09	3.97828	0.994458	Aquatic predator	2	2	2.75	36	185	30.5	90	508.75	120.5	1.5563	2.7065	2.08099	0.00223696	-0.320529	-0.11823	Glucometer		Captive
Chauna_torquata	Chauna_torquata	Anseriformes	21.2843	179.075	2.25304	-0.148411	4400	3.64345	0.659635	Herbivore	2	107	4	36	160	44	67.5	640	111.5	1.5563	2.80618	2.04727	0.0619667	-0.0343481	-0.0722447	Kit		Captive
Cariama_cristata	Cariama_cristata	Cariamiformes	21.5558	335	2.52504	0.123599	1400	3.14613	0.162311	Terrestrial carnivore	5	5	2.2		76	25.5	30	167.2	55.5		2.22324	1.74429		-0.340269	-0.256849	Glucometer	37	Captive
Bucorvus_cafer	Bucorvus_cafer	Bucerotiformes	21.66	276	2.44091	0.0394632	3743.62	3.57329	0.589474	Omnivore	4	4	1.7	70	100.51	40	86	170.867	126	1.8451	2.23266	2.10037	0.363278	-0.568788	-0.00244869	Glucometer		Captive
Geronticus_eremita	Geronticus_eremita	Pelecaniformes	21.8265	252	2.4014	-4.53183e-05	1202	3.0799	0.0960869	Terrestrial carnivore	5	4	3	37	68	26	45	204	71	1.5682	2.30963	1.85126	0.174398	-0.216987	-0.134121	Glucometer		Captive
Burhinus_grallarius	Burhinus_grallarius	Charadriiformes	22.1351	238	2.37658	-0.0248689	648.07	2.81162	-0.172196	Terrestrial carnivore	2	1	2	30	46.3	25	59	92.6	84	1.47712	1.96661	1.92428	0.131177	-0.410566	0.00275928	Glucometer		Captive
Balearica_regulorum	Balearica_regulorum	Gruiformes	22.1908	244.8	2.38881	-0.0126344	3771.99	3.57657	0.592753	Omnivore	5	5	2.5	27.2	152	29.5	59.5	380	89	1.43457	2.57978	1.94939	-0.0478356	-0.223489	-0.15421	Glucometer	36	Captive
Psophia_crepitans	Psophia_crepitans	Gruiformes	22.2087	257.333	2.4105	0.00905019	1026	3.01115	0.0273298	Frugivore/granivore	3	3	5		60.3	28	42	301.5	70		2.47929	1.8451		-0.0090302	-0.123915	Glucometer		Captive
Tauraco_erythrolophus	Tauraco_erythrolophus	Musophagiformes	23.1291	227	2.35603	-0.04542	261.24	2.41704	-0.566778	Frugivore/granivore	4	1														Glucometer	36	Captive
Ciconia_nigra	Ciconia_nigra	Ciconiiformes	22.2497	234	2.36922	-0.03223	2926	3.46627	0.482457	Aquatic predator	2	2	3.5	31.3	84.95	35.5	67	297.325	102.5	1.49554	2.47323	2.01072	0.0328157	-0.268604	-0.0666222	Glucometer		Captive
Ducula_bicolor	Ducula_bicolor	Columbiformes	22.3363	274.738	2.43892	0.0374727	440.01	2.64346	-0.340355	Frugivore/granivore	5	121	1	37	25.9			25.9		1.5682	1.4133		0.252256	-0.870208		Kit		Captive
Neophron_percnopterus	Neophron_percnopterus	Accipitriformes	22.3464	244	2.38739	-0.014056	2082	3.31848	0.334663	Terrestrial carnivore	2	2	2	43	94	42	80	188	122	1.63347	2.27416	2.08636	0.197105	-0.385352	0.0441929	Glucometer		Captive
Rhea_pennata	Rhea_pennata	Rheiformes	22.441	163.833	2.2144	-0.187044	23900	4.3784	1.39458	Omnivore	8	9	16.6998	15	621.5	38.5		10379		1.17609	4.01615		-0.449353	0.766242		Glucometer	39	Captive
Ciconia_abdimii	Ciconia_abdimii	Ciconiiformes	22.6258	243.75	2.38694	-0.0145012	1398	3.14551	0.16169	Terrestrial carnivore	4	4	2.25	21.6	58	30.5	55	130.5	85.5	1.33445	2.11561	1.93197	-0.0710526	-0.447549	-0.0690281	Glucometer		Captive
Dacelo_novaeguineae	Dacelo_novaeguineae	Coraciiformes	23.8962	336.5	2.52699	0.125539	333.8	2.52349	-0.460331	Omnivore	2	2	2.46	26.8	30.4	25	35	74.784	60	1.42813	1.87381	1.77815	0.133592	-0.342869	-0.0747842	Glucometer		Captive
Grus_paradisea	Grus_paradisea	Gruiformes	25.0197	220	2.34242	-0.0590232	4540.62	3.65712	0.673298	Omnivore	2	2	2	25	185.15	31.5	110	370.3	141.5	1.39794	2.56855	2.15076	-0.098833	-0.279585	0.0279848	Glucometer		Captive
Grus_virgo	Grus_virgo	Gruiformes	27.7079	237.333	2.37536	-0.0260871	2417	3.38328	0.399459	Omnivore	3	3	2	67	128	28	60	256	88	1.82607	2.40824	1.94448	0.378152	-0.287363	-0.113108	Glucometer		Captive
Gyps_fulvus	Gyps_fulvus	Accipitriformes	26.6399	308.6	2.4894	0.0879501	7435.99	3.87134	0.887521	Terrestrial carnivore	5	5	1	41.4	252	54	113.75	252	167.75	1.617	2.4014	2.22466	0.0820115	-0.566066	0.0508996	Glucometer		Captive
Calonectris_diomedea	Calonectris_diomedea	Procelariiformes	27.2027	269.2	2.43008	0.0286292	534.99	2.72835	-0.255472	Aquatic predator	5	5	1	29.8333	95	54	91.5	95	145.5	1.4747	1.97772	2.16286	0.143614	-0.353066	0.261165	Glucometer		Wild
Macronectes_giganteus	Macronectes_giganteus	Procelariiformes	23.9218	240.5	2.38112	-0.0203308	3591.69	3.5553	0.571481	Omnivore	2	3	1	47	241.5	59	119	241.5	178	1.6721	2.38292	2.25042	0.193488	-0.408507	0.151884	Glucometer		Captive
Taeniopygia_guttata	Taeniopygia_guttata	Passeriformes	18.5591	366.05	2.56354	0.162095	12.04	1.08063	-1.90319	Frugivore/granivore	55	60	4.5	14.5	0.98	14.15	21	4.41	35.15	1.16137	0.644439	1.54593	0.12422	-0.768528	0.0364318	Glucometer	44	Captive
Tauraco_fischeri	Tauraco_fischeri	Musophagiformes	23.9207	267.892	2.42796	0.0265138	250	2.39794	-0.585878	Frugivore/granivore	1	17	1	25		22.5				1.39794			0.125794			Kit		Captive
Tauraco_leucolophus	Tauraco_leucolophus	Musophagiformes	24.4021	272.396	2.4352	0.0337547	219	2.34044	-0.643373	Frugivore/granivore	2	50	2			22.5										Kit		Captive
Branta_ruficollis	Branta_ruficollis	Anseriformes	13.2071	271.667	2.43404	0.0325905	1226.47	3.08866	0.104839	Herbivore	3	3	5.5	21	84.1	25	38.5	462.55	63.5	1.32222	2.66516	1.80277	-0.0731454	0.133666	-0.184689	Glucometer		Captive
Bubo_scandiaca	Bubo_scandiaca	Strigiformes	24.5186	302.333	2.48049	0.0790402	2028.76	3.30723	0.323413	Terrestrial carnivore	7	3	6	28	60.3	32	47.7	361.8	79.7	1.44716	2.55847	1.90146	0.0128015	-0.0947751	-0.138031	Glucometer		Captive

## Sheet: References
Species	Trophic.Niche	Body mass	clutch_size_n	maximum_longevity_y	egg_mass_g	incubation_d	fledging_age_d
Phoenicopterus ruber	AVONET	AVONET	mean of Bennett, 1986 & Szekely, Lislevand, and Figuerola, 2007 from median of 4(Jetz, Sekercioglu, and Bohning-Gaese, 2008, Szekely, Lislevand, and Figuerola, 2007, Bennett, 1986, de Magalhaes and Costa, 2009)	ZIMs species360, provided by Mulhouse zoo.	Szekely, Lislevand, and Figuerola, 2007 from median of 3(Dyke and Kaiser, 2010, Szekely, Lislevand, and Figuerola, 2007, Bennett, 1986)	de Magalhaes and Costa, 2009 from median of 3(Bennett, 1986, Ricklefs, 2010b, de Magalhaes and Costa, 2009)	Bennett, 1986
Phoenicopterus roseus	AVONET	AVONET	mean of Bennett, 1986 & Szekely, Lislevand, and Figuerola, 2007 from median of 4(Jetz, Sekercioglu, and Bohning-Gaese, 2008, Szekely, Lislevand, and Figuerola, 2007, Bennett, 1986, de Magalhaes and Costa, 2009)	BC Birds - Hassel, Personal Communication	Szekely, Lislevand, and Figuerola, 2007 from median of 3(Dyke and Kaiser, 2010, Szekely, Lislevand, and Figuerola, 2007, Bennett, 1986)	de Magalhaes and Costa, 2009 from median of 3(Bennett, 1986, Ricklefs, 2010b, de Magalhaes and Costa, 2009)	Bennett, 1986
Aythya baeri	AVONET	AVONET	mean of Boyer, A.G., Cartron, J-L.E., and J.H. Brown, 2009 & Bennett, 1986 from median of 4(Jetz, Sekercioglu, and Bohning-Gaese, 2008, Boyer, A.G., Cartron, J-L.E., and J.H. Brown, 2009, Werner and Griebeler, 2013, Bennett, 1986)	ZIMs species360, provided by Mulhouse zoo.	Bennett, 1986 from median of 3(Szekely, Lislevand, and Figuerola, 2007, Werner and Griebeler, 2013, Bennett, 1986)	Bennett, 1986 from median of 3(BC Birds - Wilson, 2003, BC Birds - Wilson, 2003, Bennett, 1986)	NA
Casuarius casuarius	AVONET	AVONET	mean of Werner and Griebeler, 2012 & Bennett, 1986 from median of 6(Davies, S.J.J.F., 2002, Werner and Griebeler, 2013, Werner and Griebeler, 2012, Dickison, M.R., 2007, Davies, S.J.J.F., 2002, Bennett, 1986)	Wasser, D.E. and P.W. Sherman, 2010	mean of Werner and Griebeler, 2012 & Werner and Griebeler, 2013 from median of 10(Davies, S.J.J.F., 2002, Davies, S.J.J.F., 2002, Davies, S.J.J.F., 2002, Dickison, M.R., 2007, Carey, C., Rahn, H., Parisi, P., 1980, Carey, C., Rahn, H., Parisi, P., 1980, Dyke and Kaiser, 2010, Werner and Griebeler, 2013, Werner and Griebeler, 2012, Bennett, 1986)	mean of Dickison, M.R., 2007 & Davies, S.J.J.F., 2002 from median of 6(Davies, S.J.J.F., 2002, Davies, S.J.J.F., 2002, Dickison, M.R., 2007, Davies, S.J.J.F., 2002, Davies, S.J.J.F., 2002, Bennett, 1986)	Birds of the World from Bentrupperbäumer, J. M. 1998 and Romer, L. 1997
Dendrocygna viduata	AVONET	AVONET	de Magalhaes and Costa, 2009 from median of 7(Jetz, Sekercioglu, and Bohning-Gaese, 2008, Szekely, Lislevand, and Figuerola, 2007, Bennett, 1986, BC Birds - Tacutu, R., T. Craig, A. Budovsky et al. 2013, de Magalhaes and Costa, 2009, Boyer, A.G., Cartron, J-L.E., and J.H. Brown, 2009, Werner and Griebeler, 2013)	ZIMs species360, provided by Mulhouse zoo.	mean of Szekely, Lislevand, and Figuerola, 2007 & Ricklefs, 2010b from median of 4(Ricklefs, 2010b, Szekely, Lislevand, and Figuerola, 2007, Bennett, 1986, Werner and Griebeler, 2013)	mean of de Magalhaes and Costa, 2009 & Bennett, 1986 from median of 4(BC Birds - Tacutu, R., T. Craig, A. Budovsky et al. 2013, Ricklefs, 2010b, Bennett, 1986, de Magalhaes and Costa, 2009)	Birds of the World from Safford, R. J., and A. F. A. Hawkins, Editors 2013
Anas bernieri	AVONET	AVONET	Boyer, A.G., Cartron, J-L.E., and J.H. Brown, 2009 from median of 3(Jetz, Sekercioglu, and Bohning-Gaese, 2008, Boyer, A.G., Cartron, J-L.E., and J.H. Brown, 2009, Werner and Griebeler, 2013)	ZIMs species360, provided by Mulhouse zoo.	mean of Szekely, Lislevand, and Figuerola, 2007 and Werner and Griebeler, 2013	Birds of the World from Kear, J., Editor 2005	Birds of the World from Kear, J., Editor 2005
Dendrocygna eytoni	AVONET	AVONET	mean of Werner and Griebeler, 2013 & Bennett, 1986 from median of 6(Jetz, Sekercioglu, and Bohning-Gaese, 2008, Werner and Griebeler, 2012, Boyer, A.G., Cartron, J-L.E., and J.H. Brown, 2009, Szekely, Lislevand, and Figuerola, 2007, Bennett, 1986, Werner and Griebeler, 2013)	ZIMs species360, provided by Mulhouse zoo.	Werner and Griebeler, 2012 from median of 5(Werner, 2010, Werner and Griebeler, 2012, Szekely, Lislevand, and Figuerola, 2007, Bennett, 1986, Werner and Griebeler, 2013)	Bennett, 1986	Birds of the World from Kear, J., Editor 2006
Branta hutchinsii	AVONET	AVONET	mean of Szekely, Lislevand, and Figuerola, 2007 & Jetz, Sekercioglu, and Bohning-Gaese, 2008 from median of 8(Krist, 2011, Szekely, Lislevand, and Figuerola, 2007, Jetz, Sekercioglu, and Bohning-Gaese, 2008, Werner and Griebeler, 2013, Werner and Griebeler, 2012, Boyer, A.G., Cartron, J-L.E., and J.H. Brown, 2009, de Magalhaes and Costa, 2009, Bennett, 1986)	Wasser, D.E. and P.W. Sherman, 2010	Carey, C., Rahn, H., Parisi, P., 1980 from median of 11(Werner, 2010, Carey, C., Rahn, H., Parisi, P., 1980, Carey, C., Rahn, H., Parisi, P., 1980, Carey, C., Rahn, H., Parisi, P., 1980, Carey, C., Rahn, H., Parisi, P., 1980, Krist, 2011, Szekely, Lislevand, and Figuerola, 2007, Werner and Griebeler, 2013, Werner and Griebeler, 2012, Ricklefs, 2010b, Bennett, 1986)	Ricklefs, 2010b from median of 3(Ricklefs, 2010b, de Magalhaes and Costa, 2009, Bennett, 1986)	mean of Carrier, D.R., Auriemma, J., 1992 and Bennett, 1986
Anas platyrhyncos	AVONET	AVONET	mean of Bennett, 1986 & Szekely, Lislevand, and Figuerola, 2007 from median of 8(Krist, 2011, Werner and Griebeler, 2013, Szekely, Lislevand, and Figuerola, 2007, Werner and Griebeler, 2012, Jetz, Sekercioglu, and Bohning-Gaese, 2008, Boyer, A.G., Cartron, J-L.E., and J.H. Brown, 2009, Bennett, 1986, de Magalhaes and Costa, 2009)	Ricklefs, 2010b	Szekely, Lislevand, and Figuerola, 2007 from median of 15(Werner, 2010, Carey, C., Rahn, H., Parisi, P., 1980, Carey, C., Rahn, H., Parisi, P., 1980, Carey, C., Rahn, H., Parisi, P., 1980, Carey, C., Rahn, H., Parisi, P., 1980, Carey, C., Rahn, H., Parisi, P., 1980, Carey, C., Rahn, H., Parisi, P., 1980, Carey, C., Rahn, H., Parisi, P., 1980, Dyke and Kaiser, 2010, Krist, 2011, Werner and Griebel…	Ricklefs, 2010b from median of 3(Bennett, 1986, Ricklefs, 2010b, de Magalhaes and Costa, 2009)	mean of Carrier, D.R., Auriemma, J., 1992 and Bennett, 1986
Dendrocygna bicolor	AVONET	AVONET	mean of Bennett, 1986 & Boyer, A.G., Cartron, J-L.E., and J.H. Brown, 2009 from median of 6(Werner and Griebeler, 2013, Jetz, Sekercioglu, and Bohning-Gaese, 2008, Boyer, A.G., Cartron, J-L.E., and J.H. Brown, 2009, Werner and Griebeler, 2012, Szekely, Lislevand, and Figuerola, 2007, Bennett, 1986)	ZIMs species360, provided by Mulhouse zoo.	mean of Werner and Griebeler, 2012 & Werner and Griebeler, 2013 from median of 6(Carey, C., Rahn, H., Parisi, P., 1980, Werner and Griebeler, 2013, Werner and Griebeler, 2012, Szekely, Lislevand, and Figuerola, 2007, Bennett, 1986, Ricklefs, 2010b)	mean of Bennett, 1986 and Ricklefs, 2010b	Bennett, 1986
Aratinga auricapilla aurifrons	AVONET	AVONET	NA	de Magalhaes and Costa, 2009	NA	NA	NA
Anser canigicus	AVONET	AVONET	Birds of the World from (Petersen 1992b)	Birds of the World	Birds of the World	Birds of the World from (Eisenhauer and Kirkpatrick 1977, Krechmar and Kondratiev 1982, Petersen 1992c, MRP)	Birds of the World from (Mickelson 1975)
Leucocarbo verrucosus	AVONET	AVONET	Bennett, 1986	Bennett, 1986	mean of Bennett, 1986 and Bennett, 1986	Bennett, 1986	Bennett, 1986
Ptalea ajaja	AVONET	AVONET	de Magalhaes and Costa, 2009 from median of 3(Bennett, 1986, Boyer, A.G., Cartron, J-L.E., and J.H. Brown, 2009, de Magalhaes and Costa, 2009)	ZIMs species360, provided by Mulhouse zoo.	mean of Szekely, Lislevand, and Figuerola, 2007 and Bennett, 1986	mean of Bennett, 1986 and de Magalhaes and Costa, 2009	Bennett, 1986
Tachymarptos melba	AVONET	AVONET	Szekely, Lislevand, and Figuerola, 2007 from median of 5(Jetz, Sekercioglu, and Bohning-Gaese, 2008, Krist, 2011, Szekely, Lislevand, and Figuerola, 2007, Boyer, A.G., Cartron, J-L.E., and J.H. Brown, 2009, Bennett, 1986)	Fransson, T., Kolehmainen, T., Kroon, C. et al., 2010	mean of Bennett, 1986 & Krist, 2011 from median of 4(Dyke and Kaiser, 2010, Krist, 2011, Szekely, Lislevand, and Figuerola, 2007, Bennett, 1986)	Bennett, 1986	mean of Bennett, 1986 and Bize personal communication
Sarkidiornis melanotos	AVONET	AVONET	mean of Werner and Griebeler, 2013 & Jetz, Sekercioglu, and Bohning-Gaese, 2008 from median of 6(Szekely, Lislevand, and Figuerola, 2007, Bennett, 1986, Werner and Griebeler, 2013, Jetz, Sekercioglu, and Bohning-Gaese, 2008, Werner and Griebeler, 2012, Boyer, A.G., Cartron, J-L.E., and J.H. Brown, 2009)	Birds of the World from Demey, R. and Kirwan, G. 2001	Werner, 2010 from median of 5(Werner, 2010, Szekely, Lislevand, and Figuerola, 2007, Bennett, 1986, Werner and Griebeler, 2013, Werner and Griebeler, 2012)	Bennett, 1986	Bennett, 1986
Branta leucopsis	AVONET	AVONET	mean of Krist, 2011 & Jetz, Sekercioglu, and Bohning-Gaese, 2008 from median of 6(Jetz, Sekercioglu, and Bohning-Gaese, 2008, Krist, 2011, Werner and Griebeler, 2013, Werner and Griebeler, 2012, Boyer, A.G., Cartron, J-L.E., and J.H. Brown, 2009, Bennett, 1986)	Fransson, T., Kolehmainen, T., Kroon, C. et al., 2010	Werner and Griebeler, 2013 from median of 7(Werner, 2010, Szekely, Lislevand, and Figuerola, 2007, Krist, 2011, Werner and Griebeler, 2013, Werner and Griebeler, 2012, Ricklefs, 2010b, Bennett, 1986)	mean of Ricklefs, 2010b and Bennett, 1986	Bennett, 1986
Ara ambiguus	AVONET	AVONET	Jetz, Sekercioglu, and Bohning-Gaese, 2008	ZIMs species360, provided by Mulhouse zoo.	NA	Birds of the World	Birds of the World
Procellaria aequinoctialis	AVONET	AVONET	Serrano-Meneses and Szekely, 2006 from median of 5(BC Birds - Wilson, 2003, Szekely, Lislevand, and Figuerola, 2007, Serrano-Meneses and Szekely, 2006, Werner and Griebeler, 2012, Bennett, 1986)	BC Birds - Wilson, 2003	Bennett, 1986 from median of 3(Szekely, Lislevand, and Figuerola, 2007, Werner and Griebeler, 2012, Bennett, 1986)	Bennett, 1986 from median of 3(BC Birds - Wilson, 2003, BC Birds - Wilson, 2003, Bennett, 1986)	mean of Bennett, 1986 & Carrier, D.R., Auriemma, J., 1992 from median of 4(BC Birds - Wilson, 2003, Carrier, D.R., Auriemma, J., 1992, BC Birds - Wilson, 2003, Bennett, 1986)
Ara militaris mexicana	AVONET	AVONET	mean of Jetz, Sekercioglu, and Bohning-Gaese, 2008 and Boyer, A.G., Cartron, J-L.E., and J.H. Brown, 2009	Wasser, D.E. and P.W. Sherman, 2010	NA	NA	NA
Anodorhynchus hyacinthinus	AVONET	AVONET	mean of Boyer, A.G., Cartron, J-L.E., and J.H. Brown, 2009 and Jetz, Sekercioglu, and Bohning-Gaese, 2008	ZIMs species360, provided by Mulhouse zoo.	NA	Birds of the World	Birds of the World
Zenaida graysoni	AVONET	AVONET	Birds of the World	ZIMs species360, provided by Mulhouse zoo.	NA	Birds of the World	Birds of the World
Turdus merula	AVONET	AVONET	Krist, 2011 from median of 5(Szekely, Lislevand, and Figuerola, 2007, Jetz, Sekercioglu, and Bohning-Gaese, 2008, Boyer, A.G., Cartron, J-L.E., and J.H. Brown, 2009, Krist, 2011, Bennett, 1986)	Fransson, T., Kolehmainen, T., Kroon, C. et al., 2010	Bennett, 1986 from median of 5(Carey, C., Rahn, H., Parisi, P., 1980, Carey, C., Rahn, H., Parisi, P., 1980, Szekely, Lislevand, and Figuerola, 2007, Krist, 2011, Bennett, 1986)	Bennett, 1986	Bennett, 1986
Aptenodytes patagonicus	AVONET	AVONET	mean of Serrano-Meneses and Szekely, 2006 & Szekely, Lislevand, and Figuerola, 2007 from median of 4(Boyer, A.G., Cartron, J-L.E., and J.H. Brown, 2009, Szekely, Lislevand, and Figuerola, 2007, Serrano-Meneses and Szekely, 2006, Bennett, 1986)	AnAge from ABBBS - Australian Bird and Bat Banding Scheme	Szekely, Lislevand, and Figuerola, 2007 from median of 3(Ricklefs, 2010b, Szekely, Lislevand, and Figuerola, 2007, Bennett, 1986)	mean of Ricklefs, 2010b and Bennett, 1986	Bennett, 1986
Lophotibis cristata	AVONET	AVONET	Boyer, A.G., Cartron, J-L.E., and J.H. Brown, 2009	ZIMs species360, provided by Mulhouse zoo.	NA	NA	NA
Pagodroma nivea	AVONET	AVONET	Werner and Griebeler, 2012 from median of 5(Szekely, Lislevand, and Figuerola, 2007, Serrano-Meneses and Szekely, 2006, Werner and Griebeler, 2012, Bennett, 1986, Krist, 2011)	Personal observation (an individual from this study)	Werner and Griebeler, 2012 from median of 5(Carey, C., Rahn, H., Parisi, P., 1980, Szekely, Lislevand, and Figuerola, 2007, Werner and Griebeler, 2012, Bennett, 1986, Krist, 2011)	Bennett, 1986	mean of Carrier, D.R., Auriemma, J., 1992 and Bennett, 1986
Cygnus atratus	AVONET	AVONET	mean of Werner and Griebeler, 2013 & Jetz, Sekercioglu, and Bohning-Gaese, 2008 from median of 8(Szekely, Lislevand, and Figuerola, 2007, BC Birds - Meyers et al., 2009, Bennett, 1986, Jetz, Sekercioglu, and Bohning-Gaese, 2008, Werner and Griebeler, 2013, BC Birds - Meyers et al., 2009, Boyer, A.G., Cartron, J-L.E., and J.H. Brown, 2009, Werner and Griebeler, 2012)	Wasser, D.E. and P.W. Sherman, 2010	Werner and Griebeler, 2012 from median of 7(Werner, 2010, Carey, C., Rahn, H., Parisi, P., 1980, Ricklefs, 2010b, Szekely, Lislevand, and Figuerola, 2007, Bennett, 1986, Werner and Griebeler, 2013, Werner and Griebeler, 2012)	mean of Bennett, 1986 & Ricklefs, 2010b from median of 4(BC Birds - Meyers et al., 2009, BC Birds - Meyers et al., 2009, Ricklefs, 2010b, Bennett, 1986)	mean of BC Birds - Meyers et al., 2009 and BC Birds - Meyers et al., 2009
Sylvia atricapilla	AVONET	AVONET	Szekely, Lislevand, and Figuerola, 2007 from median of 3(Jetz, Sekercioglu, and Bohning-Gaese, 2008, Szekely, Lislevand, and Figuerola, 2007, Bennett, 1986)	Fransson, et al., 2023	mean of Szekely, Lislevand, and Figuerola, 2007 and Bennett, 1986	Bennett, 1986	Bennett, 1986
Eudyptes chrysolophus	AVONET	AVONET	Szekely, Lislevand, and Figuerola, 2007 from median of 7(BC Birds - Meyers et al., 2009, BC Birds - Wilson, 2003, Boyer, A.G., Cartron, J-L.E., and J.H. Brown, 2009, Szekely, Lislevand, and Figuerola, 2007, Serrano-Meneses and Szekely, 2006, Krist, 2011, Bennett, 1986)	NA	Bennett, 1986 from median of 3(Szekely, Lislevand, and Figuerola, 2007, Krist, 2011, Bennett, 1986)	mean of Bennett, 1986 & BC Birds - Wilson, 2003 from median of 4(BC Birds - Meyers et al., 2009, BC Birds - Meyers et al., 2009, BC Birds - Wilson, 2003, Bennett, 1986)	Bennett, 1986 from median of 3(BC Birds - Wilson, 2003, BC Birds - Wilson, 2003, Bennett, 1986)
Cacatua moluccensis	AVONET	AVONET	mean of Jetz, Sekercioglu, and Bohning-Gaese, 2008 and Boyer, A.G., Cartron, J-L.E., and J.H. Brown, 2009	Heinsohn, R., Zeriga, T., Murphy, S. et al., 2009	mean of Ricklefs, 2010b and Bennett, 1986	mean of Ricklefs, 2010b and Bennett, 1986	Birds of the World from Juniper and Parr 1998.
Eudocimus ruber	AVONET	AVONET	mean of Boyer, A.G., Cartron, J-L.E., and J.H. Brown, 2009 & Jetz, Sekercioglu, and Bohning-Gaese, 2008 from median of 4(Jetz, Sekercioglu, and Bohning-Gaese, 2008, Boyer, A.G., Cartron, J-L.E., and J.H. Brown, 2009, de Magalhaes and Costa, 2009, Bennett, 1986)	ZIMs species360, provided by Mulhouse zoo.	Bennett, 1986	de Magalhaes and Costa, 2009 from median of 3(Ricklefs, 2010b, de Magalhaes and Costa, 2009, Bennett, 1986)	Bennett, 1986
Sylvia borin	AVONET	AVONET	Bennett, 1986 from median of 3(Szekely, Lislevand, and Figuerola, 2007, Jetz, Sekercioglu, and Bohning-Gaese, 2008, Bennett, 1986)	Carey, J.R. and D.S. Judge, 2002	mean of Szekely, Lislevand, and Figuerola, 2007 and Bennett, 1986	Bennett, 1986	Bennett, 1986
Sylvia communis	AVONET	AVONET	Szekely, Lislevand, and Figuerola, 2007 from median of 3(Jetz, Sekercioglu, and Bohning-Gaese, 2008, Szekely, Lislevand, and Figuerola, 2007, Bennett, 1986)	Fransson, et al., 2023	mean of Szekely, Lislevand, and Figuerola, 2007 and Bennett, 1986	Bennett, 1986	Bennett, 1986
Anser anser	AVONET	AVONET	Boyer, A.G., Cartron, J-L.E., and J.H. Brown, 2009 from median of 5(Jetz, Sekercioglu, and Bohning-Gaese, 2008, Boyer, A.G., Cartron, J-L.E., and J.H. Brown, 2009, Werner and Griebeler, 2013, Werner and Griebeler, 2012, Bennett, 1986)	Ricklefs, 2010b	Werner and Griebeler, 2012 from median of 11(Werner, 2010, Carey, C., Rahn, H., Parisi, P., 1980, Carey, C., Rahn, H., Parisi, P., 1980, Carey, C., Rahn, H., Parisi, P., 1980, Carey, C., Rahn, H., Parisi, P., 1980, Carey, C., Rahn, H., Parisi, P., 1980, Szekely, Lislevand, and Figuerola, 2007, Werner and Griebeler, 2013, Werner and Griebeler, 2012, Bennett, 1986, Ricklefs, 2010b)	mean of Bennett, 1986 and Ricklefs, 2010b	Bennett, 1986
Anser indicus	AVONET	AVONET	Werner and Griebeler, 2013 from median of 5(Jetz, Sekercioglu, and Bohning-Gaese, 2008, Boyer, A.G., Cartron, J-L.E., and J.H. Brown, 2009, Bennett, 1986, Werner and Griebeler, 2013, Werner and Griebeler, 2012)	NA	mean of Szekely, Lislevand, and Figuerola, 2007 & Ricklefs, 2010b from median of 6(Werner, 2010, Ricklefs, 2010b, Szekely, Lislevand, and Figuerola, 2007, Bennett, 1986, Werner and Griebeler, 2013, Werner and Griebeler, 2012)	mean of Ricklefs, 2010b and Bennett, 1986	mean of Carrier, D.R., Auriemma, J., 1992 and Bennett, 1986
Lophura edwardsi	AVONET	AVONET	Jetz, Sekercioglu, and Bohning-Gaese, 2008	ZIMs species360, provided by Mulhouse zoo.	NA	Birds of the World	NA
Erithacus rubecula	AVONET	AVONET	Szekely, Lislevand, and Figuerola, 2007 from median of 3(Jetz, Sekercioglu, and Bohning-Gaese, 2008, Szekely, Lislevand, and Figuerola, 2007, Bennett, 1986)	Fransson, T., Kolehmainen, T., Kroon, C. et al., 2010	Bennett, 1986 from median of 3(Carey, C., Rahn, H., Parisi, P., 1980, Szekely, Lislevand, and Figuerola, 2007, Bennett, 1986)	Bennett, 1986	Bennett, 1986
Bucorvus abyssinicus	AVONET	AVONET	mean of Bennett, 1986 & BC Birds - Meyers et al., 2009 from median of 4(Szekely, Lislevand, and Figuerola, 2007, Jetz, Sekercioglu, and Bohning-Gaese, 2008, BC Birds - Meyers et al., 2009, Bennett, 1986)	Ricklefs, 2010b	mean of Szekely, Lislevand, and Figuerola, 2007 and Bennett, 1986	mean of BC Birds - Meyers et al., 2009 and BC Birds - Meyers et al., 2009	mean of BC Birds - Meyers et al., 2009 and Bennett, 1986
Burhinus supercilliaris	AVONET	AVONET	Jetz, Sekercioglu, and Bohning-Gaese, 2008	ZIMs species360, provided by Mulhouse zoo.	NA	NA	NA
Macronectes halli	AVONET	AVONET	Serrano-Meneses and Szekely, 2006 from median of 3(Szekely, Lislevand, and Figuerola, 2007, Serrano-Meneses and Szekely, 2006, Bennett, 1986)	Bennett, 1986	mean of Szekely, Lislevand, and Figuerola, 2007 and Bennett, 1986	Bennett, 1986	Bennett, 1986
Numida maleagris	AVONET	AVONET	mean of Jetz, Sekercioglu, and Bohning-Gaese, 2008 & Boyer, A.G., Cartron, J-L.E., and J.H. Brown, 2009 from median of 4(Szekely, Lislevand, and Figuerola, 2007, Jetz, Sekercioglu, and Bohning-Gaese, 2008, Boyer, A.G., Cartron, J-L.E., and J.H. Brown, 2009, Bennett, 1986)	ZIMs species360, provided by Mulhouse zoo.	Carey, C., Rahn, H., Parisi, P., 1980 from median of 7(Carey, C., Rahn, H., Parisi, P., 1980, Carey, C., Rahn, H., Parisi, P., 1980, Carey, C., Rahn, H., Parisi, P., 1980, Carey, C., Rahn, H., Parisi, P., 1980, Dyke and Kaiser, 2010, Szekely, Lislevand, and Figuerola, 2007, Bennett, 1986)	Bennett, 1986	NA
Leptoptilos crumenifer	AVONET	AVONET	mean of Boyer, A.G., Cartron, J-L.E., and J.H. Brown, 2009 & Szekely, Lislevand, and Figuerola, 2007 from median of 4(Boyer, A.G., Cartron, J-L.E., and J.H. Brown, 2009, Szekely, Lislevand, and Figuerola, 2007, Bennett, 1986, de Magalhaes and Costa, 2009)	Ricklefs, 2010b	Bennett, 1986	Ricklefs, 2010b from median of 3(Bennett, 1986, Ricklefs, 2010b, de Magalhaes and Costa, 2009)	mean of Carrier, D.R., Auriemma, J., 1992 and Bennett, 1986
Balearica pavonina	AVONET	AVONET	Bennett, 1986 from median of 3(Jetz, Sekercioglu, and Bohning-Gaese, 2008, Szekely, Lislevand, and Figuerola, 2007, Bennett, 1986)	Personal observation (an individual from this study still alive when sampled the last time)	mean of Szekely, Lislevand, and Figuerola, 2007 and Bennett, 1986	Bennett, 1986	Bennett, 1986
Ara glaucogularis	AVONET	AVONET	Jetz, Sekercioglu, and Bohning-Gaese, 2008	ZIMs species360, provided by Mulhouse zoo.	NA	Birds of the World from Bernkusky et al. 2014	Birds of the World from Bernkusky et al. 2014
Ortalis canicollis	AVONET	AVONET	Boyer, A.G., Cartron, J-L.E., and J.H. Brown, 2009	NA	NA	NA	NA
Nesoenas mayeri	AVONET	AVONET	Jetz, Sekercioglu, and Bohning-Gaese, 2008	ZIMs species360, provided by Mulhouse zoo.	NA	Birds of the World	Birds of the World
Acryllium vulturinum	AVONET	AVONET	mean of Boyer, A.G., Cartron, J-L.E., and J.H. Brown, 2009 and Jetz, Sekercioglu, and Bohning-Gaese, 2008	ZIMs species360, provided by Mulhouse zoo.	Szekely, Lislevand, and Figuerola, 2007	Birds of the World avg from Madge and McGowan (2002)	Birds of the World from Urban et al 1986
Pelecanus onocrotalus	AVONET	AVONET	Serrano-Meneses and Szekely, 2006 from median of 3(Szekely, Lislevand, and Figuerola, 2007, Serrano-Meneses and Szekely, 2006, Bennett, 1986)	Carey, J.R. and D.S. Judge, 2002	mean of Szekely, Lislevand, and Figuerola, 2007 and Bennett, 1986	Bennett, 1986	Bennett, 1986
Gelochelidon nilotica	AVONET	AVONET	mean of Bennett, 1986 and de Magalhaes and Costa, 2009	Fransson et al. 2023	Bennett, 1986	mean of Bennett, 1986 and de Magalhaes and Costa, 2009	Bennett, 1986
Larus dominicanus	AVONET	AVONET	Szekely, Lislevand, and Figuerola, 2007 from median of 5(BC Birds - Branco, J.O., Augusto, H., Fracasso, A., 2009, Krist, 2011, Szekely, Lislevand, and Figuerola, 2007, Bennett, 1986, BC Birds - Branco, J.O., Augusto, H., Fracasso, A., 2009)	AnAge from ABBBS - Australian Bird and Bat Banding Scheme	BC Birds - Branco, J.O., Augusto, H., Fracasso, A., 2009 from median of 8(BC Birds - Branco, J.O., Augusto, H., Fracasso, A., 2009, BC Birds - Branco, J.O., Augusto, H., Fracasso, A., 2009, BC Birds - Branco, J.O., Augusto, H., Fracasso, A., 2009, BC Birds - Branco, J.O., Augusto, H., Fracasso, A., 2009, BC Birds - Branco, J.O., Augusto, H., Fracasso, A., 2009, Krist, 2011, Szekely, Lislevand, an…	Bennett, 1986 from median of 3(BC Birds - Branco, J.O., Augusto, H., Fracasso, A., 2009, BC Birds - Branco, J.O., Augusto, H., Fracasso, A., 2009, Bennett, 1986)	Bennett, 1986
Leucopsar rothschildi	AVONET	AVONET	de Magalhaes and Costa, 2009	ZIMs species360, provided by Mulhouse zoo.	Bennett, 1986	mean of Ricklefs, 2010b and de Magalhaes and Costa, 2009	Birds of the World
Lophophorus impejanus	AVONET	AVONET	mean of Boyer, A.G., Cartron, J-L.E., and J.H. Brown, 2009 & Werner and Griebeler, 2013 from median of 4(Jetz, Sekercioglu, and Bohning-Gaese, 2008, Boyer, A.G., Cartron, J-L.E., and J.H. Brown, 2009, Bennett, 1986, Werner and Griebeler, 2013)	NA	Bennett, 1986 from median of 3(Ricklefs, 2010b, Bennett, 1986, Werner and Griebeler, 2013)	mean of Ricklefs, 2010b and Bennett, 1986	NA
Pygoscelis papua	AVONET	AVONET	mean of Szekely, Lislevand, and Figuerola, 2007 & Serrano-Meneses and Szekely, 2006 from median of 8(BC Birds - Meyers et al., 2009, BC Birds - Tacutu, R., T. Craig, A. Budovsky et al. 2013, Boyer, A.G., Cartron, J-L.E., and J.H. Brown, 2009, Serrano-Meneses and Szekely, 2006, Szekely, Lislevand, and Figuerola, 2007, Krist, 2011, BC Birds - Meyers et al., 2009, Bennett, 1986)	AnAge from 41-year-old penguin from Danish zoo breaks record with her extraordinary age (journalist article about record Guiness)	Bennett, 1986 from median of 3(Szekely, Lislevand, and Figuerola, 2007, Krist, 2011, Bennett, 1986)	Bennett, 1986	mean of BC Birds - Meyers et al., 2009 & BC Birds - Wilson, 2003 from median of 6(BC Birds - Meyers et al., 2009, BC Birds - Meyers et al., 2009, BC Birds - Wilson, 2003, BC Birds - Meyers et al., 2009, BC Birds - Wilson, 2003, Bennett, 1986)
Chionis minor	AVONET	AVONET	mean of Szekely, Lislevand, and Figuerola, 2007 and Bennett, 1986	NA	mean of Szekely, Lislevand, and Figuerola, 2007 and Bennett, 1986	Bennett, 1986	Bennett, 1986
Mycteria ibis	AVONET	AVONET	mean of Boyer, A.G., Cartron, J-L.E., and J.H. Brown, 2009 and Bennett, 1986	de Magalhaes and Costa, 2009	Bennett, 1986	Bennett, 1986	Bennett, 1986
Musophaga rossae	AVONET	AVONET	mean of Szekely, Lislevand, and Figuerola, 2007 and Szekely, Lislevand, and Figuerola, 2007	ZIMs species360, provided by Mulhouse zoo.	Birds of the World from Fry et al 1988	Birds of the World from Fry et al 1989	Birds of the World from Fry et al 1990
Bubo_bubo	AVONET	AVONET	mean of Boyer, A.G., Cartron, J-L.E., and J.H. Brown, 2009 & Bennett, 1986 from median of 4(Boyer, A.G., Cartron, J-L.E., and J.H. Brown, 2009, Szekely, Lislevand, and Figuerola, 2007, Jetz, Sekercioglu, and Bohning-Gaese, 2008, Bennett, 1986)	Ricklefs, 2010b	mean of Carey, C., Rahn, H., Parisi, P., 1980 & Bennett, 1986 from median of 4(Carey, C., Rahn, H., Parisi, P., 1980, Szekely, Lislevand, and Figuerola, 2007, Ricklefs, 2010b, Bennett, 1986)	mean of Ricklefs, 2010b and Bennett, 1986	Bennett, 1986
Acrocephalus scirpaceus	AVONET	AVONET	Jetz, Sekercioglu, and Bohning-Gaese, 2008 from median of 5(Jetz, Sekercioglu, and Bohning-Gaese, 2008, Szekely, Lislevand, and Figuerola, 2007, Jetz, Sekercioglu, and Bohning-Gaese, 2008, Szekely, Lislevand, and Figuerola, 2007, Bennett, 1986)	Fransson, et al., 2023	mean of Szekely, Lislevand, and Figuerola, 2007 & Bennett, 1986 from median of 4(Bennett, 1986, Szekely, Lislevand, and Figuerola, 2007, Szekely, Lislevand, and Figuerola, 2007, Bennett, 1986)	Bennett, 1986	Bennett, 1986
Caolenas nicobarica	AVONET	AVONET	mean of Jetz, Sekercioglu, and Bohning-Gaese, 2008 and Bennett, 1986	ZIMs species360, provided by Mulhouse zoo.	Bennett, 1986	NA	Bennett, 1986
Aegypius monachus	AVONET	AVONET	Szekely, Lislevand, and Figuerola, 2007 from median of 5(Jetz, Sekercioglu, and Bohning-Gaese, 2008, Boyer, A.G., Cartron, J-L.E., and J.H. Brown, 2009, Szekely, Lislevand, and Figuerola, 2007, Werner and Griebeler, 2012, Bennett, 1986)	ZIMs species360, provided by Mulhouse zoo.	Werner and Griebeler, 2012 from median of 3(Szekely, Lislevand, and Figuerola, 2007, Werner and Griebeler, 2012, Bennett, 1986)	Bennett, 1986	mean of Carrier, D.R., Auriemma, J., 1992 and Bennett, 1986
Vanellus miles	AVONET	AVONET	Bennett, 1986 from median of 3(Szekely, Lislevand, and Figuerola, 2007, Jetz, Sekercioglu, and Bohning-Gaese, 2008, Bennett, 1986)	ZIMs species360, provided by Mulhouse zoo.	mean of Szekely, Lislevand, and Figuerola, 2007 and Bennett, 1986	Bennett, 1986	Bennett, 1986
Limosa limosa	AVONET	AVONET	mean of Krist, 2011 & Bennett, 1986 from median of 4(Szekely, Lislevand, and Figuerola, 2007, Krist, 2011, Jetz, Sekercioglu, and Bohning-Gaese, 2008, Bennett, 1986)	Fransson, et al., 2023	mean of Szekely, Lislevand, and Figuerola, 2007 & Carey, C., Rahn, H., Parisi, P., 1980 from median of 4(Carey, C., Rahn, H., Parisi, P., 1980, Szekely, Lislevand, and Figuerola, 2007, Krist, 2011, Bennett, 1986)	Bennett, 1986	Bennett, 1986
Stercorarius antarcticus	AVONET	AVONET	Krist, 2011 from median of 3(Szekely, Lislevand, and Figuerola, 2007, Krist, 2011, Bennett, 1986)	Fransson, T., Kolehmainen, T., Kroon, C. et al., 2010	Krist, 2011 from median of 3(Szekely, Lislevand, and Figuerola, 2007, Krist, 2011, Bennett, 1986)	Bennett, 1986	Bennett, 1986
Pelecanus crispus	AVONET	AVONET	mean of Bennett, 1986 & BC Birds - Meyers et al., 2009 from median of 4(BC Birds - Gokula, V., 2011, BC Birds - Gokula, V., 2011, BC Birds - Meyers et al., 2009, Bennett, 1986)	ZIMs species360, provided by Mulhouse zoo.	Bennett, 1986	mean of BC Birds - Meyers et al., 2009 & Bennett, 1986 from median of 4(BC Birds - Gokula, V., 2011, BC Birds - Meyers et al., 2009, BC Birds - Gokula, V., 2011, Bennett, 1986)	BC Birds - Meyers et al., 2009 from median of 5(BC Birds - Meyers et al., 2009, BC Birds - Gokula, V., 2011, BC Birds - Meyers et al., 2009, BC Birds - Gokula, V., 2011, Bennett, 1986)
Chauna torquata	AVONET	AVONET	Boyer, A.G., Cartron, J-L.E., and J.H. Brown, 2009 from median of 3(Jetz, Sekercioglu, and Bohning-Gaese, 2008, Boyer, A.G., Cartron, J-L.E., and J.H. Brown, 2009, Bennett, 1986)	ZIMs species360, provided by Mulhouse zoo.	Bennett, 1986	Bennett, 1986	Bennett, 1986
Cariama cristata	AVONET	AVONET	mean of Bennett, 1986 and Jetz, Sekercioglu, and Bohning-Gaese, 2008	NA	Bennett, 1986	Bennett, 1986	Birds of the World
Bucorvus leadbeateri	AVONET	AVONET	Jetz, Sekercioglu, and Bohning-Gaese, 2008 from median of 3(BC Birds - Meyers et al., 2009, Jetz, Sekercioglu, and Bohning-Gaese, 2008, BC Birds - Meyers et al., 2009)	Wasser, D.E. and P.W. Sherman, 2010	mean of Szekely, Lislevand, and Figuerola, 2007 and Bennett, 1986	Bennett, 1986 from median of 3(BC Birds - Meyers et al., 2009, BC Birds - Meyers et al., 2009, Bennett, 1986)	mean of BC Birds - Meyers et al., 2009 and Bennett, 1986
Gerontichus eremita	AVONET	AVONET	Szekely, Lislevand, and Figuerola, 2007 from median of 3(Szekely, Lislevand, and Figuerola, 2007, Boyer, A.G., Cartron, J-L.E., and J.H. Brown, 2009, Bennett, 1986)	ZIMs species360, provided by Mulhouse zoo.	mean of Szekely, Lislevand, and Figuerola, 2007 and Bennett, 1986	Bennett, 1986	Bennett, 1986
Burhinus grallarius	AVONET	AVONET	Bennett, 1986 from median of 3(Szekely, Lislevand, and Figuerola, 2007, Jetz, Sekercioglu, and Bohning-Gaese, 2008, Bennett, 1986)	ZIMs species360, provided by Mulhouse zoo.	mean of Szekely, Lislevand, and Figuerola, 2007 and Bennett, 1986	Birds of the World	Birds of the World
Balearica regulorum	AVONET	AVONET	Bennett, 1986 from median of 7(Jetz, Sekercioglu, and Bohning-Gaese, 2008, BC Birds - Muheebwa, J., Byaruhanga, A., Pomeroy, D., et al, 2012, Jetz, Sekercioglu, and Bohning-Gaese, 2008, Szekely, Lislevand, and Figuerola, 2007, Szekely, Lislevand, and Figuerola, 2007, BC Birds - Muheebwa, J., Byaruhanga, A., Pomeroy, D., et al, 2012, Bennett, 1986)	AnAge from Ricklefs 2000	Szekely, Lislevand, and Figuerola, 2007 from median of 3(Szekely, Lislevand, and Figuerola, 2007, Szekely, Lislevand, and Figuerola, 2007, Bennett, 1986)	Bennett, 1986 from median of 3(BC Birds - Muheebwa, J., Byaruhanga, A., Pomeroy, D., et al, 2012, BC Birds - Muheebwa, J., Byaruhanga, A., Pomeroy, D., et al, 2012, Bennett, 1986)	mean of BC Birds - Muheebwa, J., Byaruhanga, A., Pomeroy, D., et al, 2012 and Bennett, 1986
Psophia crepitans	AVONET	AVONET	mean of Jetz, Sekercioglu, and Bohning-Gaese, 2008 and Bennett, 1986	NA	mean of Dyke and Kaiser, 2010 and Bennett, 1986	Birds of the World from Horning et al. 1988, Male 1989	NA
Tauraco erythrolphus	AVONET	AVONET	NA	NA	NA	NA	NA
Ciconia nigra	AVONET	AVONET	Bennett, 1986 from median of 3(Szekely, Lislevand, and Figuerola, 2007, Boyer, A.G., Cartron, J-L.E., and J.H. Brown, 2009, Bennett, 1986)	de Magalhaes and Costa, 2009	mean of Dyke and Kaiser, 2010 and Bennett, 1986	Bennett, 1986	Bennett, 1986
Ducula bicolor	AVONET	AVONET	Szekely, Lislevand, and Figuerola, 2007 from median of 3(Jetz, Sekercioglu, and Bohning-Gaese, 2008, Szekely, Lislevand, and Figuerola, 2007, Bennett, 1986)	ZIMs species360, provided by Mulhouse zoo.	Bennett, 1986	NA	NA
Neophron perchnopterus	AVONET	AVONET	mean of Szekely, Lislevand, and Figuerola, 2007 & Boyer, A.G., Cartron, J-L.E., and J.H. Brown, 2009 from median of 4(Jetz, Sekercioglu, and Bohning-Gaese, 2008, Boyer, A.G., Cartron, J-L.E., and J.H. Brown, 2009, Szekely, Lislevand, and Figuerola, 2007, Bennett, 1986)	ZIMs species360, provided by Mulhouse zoo.	mean of Szekely, Lislevand, and Figuerola, 2007 and Bennett, 1986	Bennett, 1986	Bennett, 1986
Rhea pennata	AVONET	AVONET	mean of BC Birds - Meyers et al., 2009 & Werner and Griebeler, 2013 from median of 8(Bennett, 1986, Dickison, M.R., 2007, BC Birds - Wilson, 2003, BC Birds - Meyers et al., 2009, Werner and Griebeler, 2012, Werner and Griebeler, 2013, BC Birds - Meyers et al., 2009, BC Birds - Wilson, 2003)	ZIMs species360, provided by Mulhouse zoo.	mean of Davies, S.J.J.F., 2002 & Werner and Griebeler, 2013 from median of 8(Davies, S.J.J.F., 2002, Dickison, M.R., 2007, Davies, S.J.J.F., 2002, Werner, 2010, Davies, S.J.J.F., 2002, Bennett, 1986, Werner and Griebeler, 2012, Werner and Griebeler, 2013)	mean of Dickison, M.R., 2007 & BC Birds - Wilson, 2003 from median of 4(BC Birds - Meyers et al., 2009, Dickison, M.R., 2007, BC Birds - Meyers et al., 2009, BC Birds - Wilson, 2003)	NA
Ciconia abdimil	AVONET	AVONET	mean of Boyer, A.G., Cartron, J-L.E., and J.H. Brown, 2009 and Bennett, 1986	Wasser, D.E. and P.W. Sherman, 2010	Bennett, 1986	Bennett, 1986	Bennett, 1986
Dacelo novaeguinae	AVONET	AVONET	mean of Bennett, 1986 and Szekely, Lislevand, and Figuerola, 2007	Ricklefs 2000	mean of Bennett, 1986 and Szekely, Lislevand, and Figuerola, 2007	Bennett, 1986	Bennett, 1986
Anthropoides paradisea	AVONET	AVONET	BC Birds - Wilson, 2003 from median of 3(Jetz, Sekercioglu, and Bohning-Gaese, 2008, BC Birds - Wilson, 2003, Bennett, 1986)	BC Birds - Atanasov, 2012a	mean of Szekely, Lislevand, and Figuerola, 2007 and Bennett, 1986	Bennett, 1986 from median of 3(BC Birds - Wilson, 2003, BC Birds - Wilson, 2003, Bennett, 1986)	Bennett, 1986 from median of 3(BC Birds - Wilson, 2003, BC Birds - Wilson, 2003, Bennett, 1986)
Anthropoides virgo	AVONET	AVONET	Bennett, 1986 from median of 3(Jetz, Sekercioglu, and Bohning-Gaese, 2008, Bennett, 1986, de Magalhaes and Costa, 2009)	Wasser, D.E. and P.W. Sherman, 2010	mean of Szekely, Lislevand, and Figuerola, 2007 and Bennett, 1986	Ricklefs, 2010b from median of 3(Bennett, 1986, Ricklefs, 2010b, de Magalhaes and Costa, 2009)	Bennett, 1986
Gyps fulvus	AVONET	AVONET	Szekely, Lislevand, and Figuerola, 2007 from median of 5(Jetz, Sekercioglu, and Bohning-Gaese, 2008, Boyer, A.G., Cartron, J-L.E., and J.H. Brown, 2009, Szekely, Lislevand, and Figuerola, 2007, Werner and Griebeler, 2012, Bennett, 1986)	Carey, J.R. and D.S. Judge, 2002	mean of Ricklefs, 2010b & Werner and Griebeler, 2012 from median of 6(Carey, C., Rahn, H., Parisi, P., 1980, Dyke and Kaiser, 2010, Szekely, Lislevand, and Figuerola, 2007, Werner and Griebeler, 2012, Ricklefs, 2010b, Bennett, 1986)	Schlee, 1989 from median of 5(BC Birds - Margalida, A., Arroyo, B.E., Bortolotti, G.R., et al, 2006, Schlee, 1989, Schlee, 1989, Ricklefs, 2010b, Bennett, 1986)	mean of Carrier, D.R., Auriemma, J., 1992 and Bennett, 1986
Calonectris diomedea	AVONET	AVONET	Werner and Griebeler, 2012 from median of 5(Szekely, Lislevand, and Figuerola, 2007, Serrano-Meneses and Szekely, 2006, Werner and Griebeler, 2012, Bennett, 1986, Krist, 2011)	Fransson, et al., 2023	mean of Krist, 2011 & Werner and Griebeler, 2012 from median of 4(Szekely, Lislevand, and Figuerola, 2007, Werner and Griebeler, 2012, Bennett, 1986, Krist, 2011)	Bennett, 1986	mean of Carrier, D.R., Auriemma, J., 1992 and Bennett, 1986
Macronectes giganteus	AVONET	AVONET	mean of Werner and Griebeler, 2012 & Serrano-Meneses and Szekely, 2006 from median of 4(Szekely, Lislevand, and Figuerola, 2007, Serrano-Meneses and Szekely, 2006, Werner and Griebeler, 2012, Bennett, 1986)	AnAge from Foote et al. 2011	mean of Szekely, Lislevand, and Figuerola, 2007 & Bennett, 1986 from median of 4(Carey, C., Rahn, H., Parisi, P., 1980, Szekely, Lislevand, and Figuerola, 2007, Werner and Griebeler, 2012, Bennett, 1986)	Bennett, 1986	mean of Carrier, D.R., Auriemma, J., 1992 and Bennett, 1986
Taeniopygia guttata	AVONET	AVONET	Jetz, Sekercioglu, and Bohning-Gaese, 2008 from median of 3(Jetz, Sekercioglu, and Bohning-Gaese, 2008, Krist, 2011, Bennett, 1986)	de Magalhaes and Costa, 2009	mean of Bennett, 1986 & Szekely, Lislevand, and Figuerola, 2007 from median of 6(Carey, C., Rahn, H., Parisi, P., 1980, Carey, C., Rahn, H., Parisi, P., 1980, Szekely, Lislevand, and Figuerola, 2007, Krist, 2011, Bennett, 1986, Ricklefs, 2010b)	mean of Bennett, 1986 and Ricklefs, 2010b	Bennett, 1986
Tauraco_fischeri	AVONET	AVONET	Szekely, Lislevand, and Figuerola, 2007	ZIMs species360, provided by Mulhouse zoo.	NA	Birds of the World	NA
Tauraco_leucolophus	AVONET	AVONET	Szekely, Lislevand, and Figuerola, 2007	NA	NA	Birds of the World	NA
Branta ruficollis	AVONET	AVONET	Werner and Griebeler, 2012 from median of 5(Bennett, 1986, Werner and Griebeler, 2013, Werner and Griebeler, 2012, Jetz, Sekercioglu, and Bohning-Gaese, 2008, Boyer, A.G., Cartron, J-L.E., and J.H. Brown, 2009)	Birds of the World from Kear, J., Editor 2005	mean of Werner and Griebeler, 2013 & Bennett, 1986 from median of 6(Werner, 2010, Szekely, Lislevand, and Figuerola, 2007, Ricklefs, 2010b, Bennett, 1986, Werner and Griebeler, 2013, Werner and Griebeler, 2012)	mean of Ricklefs, 2010b and Bennett, 1986	mean of Birds of the World from Kear, J., Editor 2005
Bubo scandiacus	AVONET	AVONET	Bennett, 1986 from median of 5(Jetz, Sekercioglu, and Bohning-Gaese, 2008, Szekely, Lislevand, and Figuerola, 2007, Boyer, A.G., Cartron, J-L.E., and J.H. Brown, 2009, Bennett, 1986, de Magalhaes and Costa, 2009)	Carey, J.R. and D.S. Judge, 2002	Ricklefs, 2010b from median of 3(Ricklefs, 2010b, Szekely, Lislevand, and Figuerola, 2007, Bennett, 1986)	de Magalhaes and Costa, 2009 from median of 3(Ricklefs, 2010b, Bennett, 1986, de Magalhaes and Costa, 2009)	mean of Carrier, D.R., Auriemma, J., 1992 and Bennett, 1986

## Sheet: Individual data
ID	animal	Species	order	Glycation	Glucose	logGlucose	Centered_logGlucose	Body_mass	logBM	Centered_logBM	Diet	ML	CM	DT	Provenance
A01PL1	Acrocephalus_scirpaceus	Acrocephalus_scirpaceus	Passeriformes	14.0115	289	2.4609	0.0268717	12.3	1.08991	-1.60428	Omnivore	0.241851	-0.604354	-0.140634	Wild
A05PL1	Acrocephalus_scirpaceus	Acrocephalus_scirpaceus	Passeriformes	23.2288	387	2.58771	0.153685	12.3	1.08991	-1.60428	Omnivore	0.241851	-0.604354	-0.140634	Wild
A06PL1	Acrocephalus_scirpaceus	Acrocephalus_scirpaceus	Passeriformes	27.4836	287	2.45788	0.0238557	12.3	1.08991	-1.60428	Omnivore	0.241851	-0.604354	-0.140634	Wild
A07PL1	Acrocephalus_scirpaceus	Acrocephalus_scirpaceus	Passeriformes	15.522				12.3	1.08991	-1.60428	Omnivore	0.241851	-0.604354	-0.140634	Wild
A09PL1	Acrocephalus_scirpaceus	Acrocephalus_scirpaceus	Passeriformes	19.7535	367	2.56467	0.13064	12.3	1.08991	-1.60428	Omnivore	0.241851	-0.604354	-0.140634	Wild
9	Acryllium_vulturinum	Acryllium_vulturinum	Galliformes	17.7281				1330	3.12385	0.429666	Omnivore	-0.12289	0.139099	-0.377792	Captive
10	Acryllium_vulturinum	Acryllium_vulturinum	Galliformes	19.4297	194	2.2878	-0.146224	1330	3.12385	0.429666	Omnivore	-0.12289	0.139099	-0.377792	Captive
11	Acryllium_vulturinum	Acryllium_vulturinum	Galliformes	18.9541				1330	3.12385	0.429666	Omnivore	-0.12289	0.139099	-0.377792	Captive
12	Acryllium_vulturinum	Acryllium_vulturinum	Galliformes	16.9596				1330	3.12385	0.429666	Omnivore	-0.12289	0.139099	-0.377792	Captive
11	Aegypius_monachus	Aegypius_monachus	Accipitriformes	20.9114	266	2.42488	-0.00914453	9320.55	3.96944	1.27526	Carnivore terrestrial	0.0809789	-0.636506	0.0229939	Captive
12	Aegypius_monachus	Aegypius_monachus	Accipitriformes	19.7956	251	2.39967	-0.0343524	9320.55	3.96944	1.27526	Carnivore terrestrial	0.0809789	-0.636506	0.0229939	Captive
13	Aegypius_monachus	Aegypius_monachus	Accipitriformes	20.9567	320	2.50515	0.0711238	9320.55	3.96944	1.27526	Carnivore terrestrial	0.0809789	-0.636506	0.0229939	Captive
63445	Tachymarptis_melba	Tachymarptis_melba	Apodiformes	14.6327	343	2.53529	0.101268	100.38	2.00165	-0.692538	Carnivore terrestrial	0.213522	-0.718635	0.139039	Wild
68786	Tachymarptis_melba	Tachymarptis_melba	Apodiformes	14.3689	375	2.57403	0.140005	100.38	2.00165	-0.692538	Carnivore terrestrial	0.213522	-0.718635	0.139039	Wild
65845	Tachymarptis_melba	Tachymarptis_melba	Apodiformes	12.4638	382	2.58206	0.148037	100.38	2.00165	-0.692538	Carnivore terrestrial	0.213522	-0.718635	0.139039	Wild
61918	Tachymarptis_melba	Tachymarptis_melba	Apodiformes	14.288				100.38	2.00165	-0.692538	Carnivore terrestrial	0.213522	-0.718635	0.139039	Wild
56219	Tachymarptis_melba	Tachymarptis_melba	Apodiformes	25.0175	296.5	2.47202	0.0379985	100.38	2.00165	-0.692538	Carnivore terrestrial	0.213522	-0.718635	0.139039	Wild
56230	Tachymarptis_melba	Tachymarptis_melba	Apodiformes	27.6069	344.5	2.53719	0.103163	100.38	2.00165	-0.692538	Carnivore terrestrial	0.213522	-0.718635	0.139039	Wild
56284	Tachymarptis_melba	Tachymarptis_melba	Apodiformes	27.5304	336	2.52634	0.0923131	100.38	2.00165	-0.692538	Carnivore terrestrial	0.213522	-0.718635	0.139039	Wild
56327	Tachymarptis_melba	Tachymarptis_melba	Apodiformes	28.1363	338	2.52892	0.0948905	100.38	2.00165	-0.692538	Carnivore terrestrial	0.213522	-0.718635	0.139039	Wild
63120	Tachymarptis_melba	Tachymarptis_melba	Apodiformes	28.2301	329.5	2.51786	0.0838292	100.38	2.00165	-0.692538	Carnivore terrestrial	0.213522	-0.718635	0.139039	Wild
63279	Tachymarptis_melba	Tachymarptis_melba	Apodiformes	27.9251	368	2.56585	0.131822	100.38	2.00165	-0.692538	Carnivore terrestrial	0.213522	-0.718635	0.139039	Wild
63361	Tachymarptis_melba	Tachymarptis_melba	Apodiformes	28.6356	379	2.57864	0.144613	100.38	2.00165	-0.692538	Carnivore terrestrial	0.213522	-0.718635	0.139039	Wild
63375	Tachymarptis_melba	Tachymarptis_melba	Apodiformes	28.4081	414.5	2.61752	0.183498	100.38	2.00165	-0.692538	Carnivore terrestrial	0.213522	-0.718635	0.139039	Wild
63448	Tachymarptis_melba	Tachymarptis_melba	Apodiformes	13.9332	320.5	2.50583	0.0718019	100.38	2.00165	-0.692538	Carnivore terrestrial	0.213522	-0.718635	0.139039	Wild
68317	Tachymarptis_melba	Tachymarptis_melba	Apodiformes	26.7927	347	2.54033	0.106303	100.38	2.00165	-0.692538	Carnivore terrestrial	0.213522	-0.718635	0.139039	Wild
68705	Tachymarptis_melba	Tachymarptis_melba	Apodiformes	28.3676	337	2.52763	0.0936037	100.38	2.00165	-0.692538	Carnivore terrestrial	0.213522	-0.718635	0.139039	Wild
68813	Tachymarptis_melba	Tachymarptis_melba	Apodiformes	27.7111	314	2.49693	0.0629035	100.38	2.00165	-0.692538	Carnivore terrestrial	0.213522	-0.718635	0.139039	Wild
68813	Tachymarptis_melba	Tachymarptis_melba	Apodiformes	27.9551	333	2.52244	0.0884181	100.38	2.00165	-0.692538	Carnivore terrestrial	0.213522	-0.718635	0.139039	Wild
68846	Tachymarptis_melba	Tachymarptis_melba	Apodiformes	27.532	287.5	2.45864	0.0246117	100.38	2.00165	-0.692538	Carnivore terrestrial	0.213522	-0.718635	0.139039	Wild
68857	Tachymarptis_melba	Tachymarptis_melba	Apodiformes	26.1142	341.5	2.53339	0.0993645	100.38	2.00165	-0.692538	Carnivore terrestrial	0.213522	-0.718635	0.139039	Wild
68864	Tachymarptis_melba	Tachymarptis_melba	Apodiformes	28.7319	328.5	2.51654	0.0825092	100.38	2.00165	-0.692538	Carnivore terrestrial	0.213522	-0.718635	0.139039	Wild
70435	Tachymarptis_melba	Tachymarptis_melba	Apodiformes	27.3591	319.5	2.50447	0.0704447	100.38	2.00165	-0.692538	Carnivore terrestrial	0.213522	-0.718635	0.139039	Wild
72620	Tachymarptis_melba	Tachymarptis_melba	Apodiformes	28.3907	349	2.54283	0.108799	100.38	2.00165	-0.692538	Carnivore terrestrial	0.213522	-0.718635	0.139039	Wild
72638	Tachymarptis_melba	Tachymarptis_melba	Apodiformes	26.6126	373.5	2.57229	0.138264	100.38	2.00165	-0.692538	Carnivore terrestrial	0.213522	-0.718635	0.139039	Wild
66307	Tachymarptis_melba	Tachymarptis_melba	Apodiformes	28.188	381.5	2.58149	0.147468	100.38	2.00165	-0.692538	Carnivore terrestrial	0.213522	-0.718635	0.139039	Wild
71849	Tachymarptis_melba	Tachymarptis_melba	Apodiformes	26.8139	314.5	2.49762	0.0635945	100.38	2.00165	-0.692538	Carnivore terrestrial	0.213522	-0.718635	0.139039	Wild
72166	Tachymarptis_melba	Tachymarptis_melba	Apodiformes	25.4593	357.5	2.55328	0.11925	100.38	2.00165	-0.692538	Carnivore terrestrial	0.213522	-0.718635	0.139039	Wild
72200	Tachymarptis_melba	Tachymarptis_melba	Apodiformes	26.3165	337.5	2.52827	0.0942476	100.38	2.00165	-0.692538	Carnivore terrestrial	0.213522	-0.718635	0.139039	Wild
73324	Tachymarptis_melba	Tachymarptis_melba	Apodiformes	26.1803	399	2.60097	0.166947	100.38	2.00165	-0.692538	Carnivore terrestrial	0.213522	-0.718635	0.139039	Wild
61128	Tachymarptis_melba	Tachymarptis_melba	Apodiformes	24.8603	352.5	2.54716	0.113133	100.38	2.00165	-0.692538	Carnivore terrestrial	0.213522	-0.718635	0.139039	Wild
61156	Tachymarptis_melba	Tachymarptis_melba	Apodiformes	26.7621	363	2.55991	0.12588	100.38	2.00165	-0.692538	Carnivore terrestrial	0.213522	-0.718635	0.139039	Wild
61271	Tachymarptis_melba	Tachymarptis_melba	Apodiformes	23.8547	358	2.55388	0.119857	100.38	2.00165	-0.692538	Carnivore terrestrial	0.213522	-0.718635	0.139039	Wild
63559	Tachymarptis_melba	Tachymarptis_melba	Apodiformes	24.4205	359	2.55509	0.121068	100.38	2.00165	-0.692538	Carnivore terrestrial	0.213522	-0.718635	0.139039	Wild
63592	Tachymarptis_melba	Tachymarptis_melba	Apodiformes	26.6007	381.5	2.58149	0.147468	100.38	2.00165	-0.692538	Carnivore terrestrial	0.213522	-0.718635	0.139039	Wild
68305	Tachymarptis_melba	Tachymarptis_melba	Apodiformes	26.3382	370.5	2.56879	0.134762	100.38	2.00165	-0.692538	Carnivore terrestrial	0.213522	-0.718635	0.139039	Wild
68586	Tachymarptis_melba	Tachymarptis_melba	Apodiformes	26.375	353.5	2.54839	0.114363	100.38	2.00165	-0.692538	Carnivore terrestrial	0.213522	-0.718635	0.139039	Wild
68587	Tachymarptis_melba	Tachymarptis_melba	Apodiformes	26.3314	392	2.59329	0.15926	100.38	2.00165	-0.692538	Carnivore terrestrial	0.213522	-0.718635	0.139039	Wild
68599	Tachymarptis_melba	Tachymarptis_melba	Apodiformes	25.4877	346.5	2.5397	0.105677	100.38	2.00165	-0.692538	Carnivore terrestrial	0.213522	-0.718635	0.139039	Wild
68646	Tachymarptis_melba	Tachymarptis_melba	Apodiformes	26.214	359	2.55509	0.121068	100.38	2.00165	-0.692538	Carnivore terrestrial	0.213522	-0.718635	0.139039	Wild
68655	Tachymarptis_melba	Tachymarptis_melba	Apodiformes	24.6404	370	2.5682	0.134176	100.38	2.00165	-0.692538	Carnivore terrestrial	0.213522	-0.718635	0.139039	Wild
70522	Tachymarptis_melba	Tachymarptis_melba	Apodiformes	13.2558	315	2.49831	0.0642844	100.38	2.00165	-0.692538	Carnivore terrestrial	0.213522	-0.718635	0.139039	Wild
184	Anas_bernieri	Anas_bernieri	Anseriformes	11.7112	320	2.50515	0.0711238	378.48	2.57804	-0.116143	Omnivore	0.0574525	0.0402867	0.00623476	Captive
185	Anas_bernieri	Anas_bernieri	Anseriformes	12.7842				378.48	2.57804	-0.116143	Omnivore	0.0574525	0.0402867	0.00623476	Captive
186	Anas_bernieri	Anas_bernieri	Anseriformes	11.0427	192	2.2833	-0.150725	378.48	2.57804	-0.116143	Omnivore	0.0574525	0.0402867	0.00623476	Captive
O0622	Anas_platyrhynchos	Anas_platyrhynchos	Anseriformes	12.8246				843.42	2.92604	0.231858	Omnivore	0.0975371	0.31329	-0.0349419	Captive
2	Anas_platyrhynchos	Anas_platyrhynchos	Anseriformes	13.042	204	2.30963	-0.124396	843.42	2.92604	0.231858	Omnivore	0.0975371	0.31329	-0.0349419	Captive
3	Anas_platyrhynchos	Anas_platyrhynchos	Anseriformes	12.8709	199	2.29885	-0.135173	843.42	2.92604	0.231858	Omnivore	0.0975371	0.31329	-0.0349419	Captive
4	Anas_platyrhynchos	Anas_platyrhynchos	Anseriformes	10.3455	201	2.3032	-0.13083	843.42	2.92604	0.231858	Omnivore	0.0975371	0.31329	-0.0349419	Captive
5	Anas_platyrhynchos	Anas_platyrhynchos	Anseriformes	12.9934	204	2.30963	-0.124396	843.42	2.92604	0.231858	Omnivore	0.0975371	0.31329	-0.0349419	Captive
6	Anas_platyrhynchos	Anas_platyrhynchos	Anseriformes	12.4823	221	2.34439	-0.0896339	843.42	2.92604	0.231858	Omnivore	0.0975371	0.31329	-0.0349419	Captive
O18126	Anodorhynchus_hyacinthinus	Anodorhynchus_hyacinthinus	Psittaciformes	12.0165	250	2.39794	-0.0360862	1331	3.12418	0.429992	Frugivore/granivore	0.231767		0.137622	Captive
O12019	Anodorhynchus_hyacinthinus	Anodorhynchus_hyacinthinus	Psittaciformes	15.5124				1331	3.12418	0.429992	Frugivore/granivore	0.231767		0.137622	Captive
Doudou	Anodorhynchus_hyacinthinus	Anodorhynchus_hyacinthinus	Psittaciformes	16.1778	284	2.45332	0.0192922	1331	3.12418	0.429992	Frugivore/granivore	0.231767		0.137622	Captive
Oie1	Anser_anser	Anser_anser	Anseriformes	16.5495	178	2.25042	-0.183606	3302.41	3.51883	0.824645	Herbivore	0.0192574	0.145343	-0.173402	Captive
Oie2	Anser_anser	Anser_anser	Anseriformes	15.8169	204	2.30963	-0.124396	3302.41	3.51883	0.824645	Herbivore	0.0192574	0.145343	-0.173402	Captive
Oie3	Anser_anser	Anser_anser	Anseriformes	16.8581	141	2.14922	-0.284807	3302.41	3.51883	0.824645	Herbivore	0.0192574	0.145343	-0.173402	Captive
O18081	Chen_canagica	Chen_canagica	Anseriformes	12.9235	171	2.233	-0.20103	2136.49	3.3297	0.635515	Herbivore	-0.324422	0.111862	-0.14447	Captive
O11006	Chen_canagica	Chen_canagica	Anseriformes	12.7051	207	2.31597	-0.118056	2136.49	3.3297	0.635515	Herbivore	-0.324422	0.111862	-0.14447	Captive
O11007	Chen_canagica	Chen_canagica	Anseriformes	12.1589	170	2.23045	-0.203577	2136.49	3.3297	0.635515	Herbivore	-0.324422	0.111862	-0.14447	Captive
60	Anser_indicus	Anser_indicus	Anseriformes	16.1849	167	2.22272	-0.21131	2212.55	3.34489	0.650707	Herbivore		0.173967	-0.110184	Captive
61	Anser_indicus	Anser_indicus	Anseriformes	17.7947	241	2.38202	-0.0520091	2212.55	3.34489	0.650707	Herbivore		0.173967	-0.110184	Captive
62	Anser_indicus	Anser_indicus	Anseriformes	19.44	180	2.25527	-0.178754	2212.55	3.34489	0.650707	Herbivore		0.173967	-0.110184	Captive
63	Anser_indicus	Anser_indicus	Anseriformes	17.2149	257	2.40993	-0.024093	2212.55	3.34489	0.650707	Herbivore		0.173967	-0.110184	Captive
64	Anser_indicus	Anser_indicus	Anseriformes	15.6587	216	2.33445	-0.0995724	2212.55	3.34489	0.650707	Herbivore		0.173967	-0.110184	Captive
44	Anser_indicus	Anser_indicus	Anseriformes	15.2522				2212.55	3.34489	0.650707	Herbivore		0.173967	-0.110184	Captive
18054	Anser_indicus	Anser_indicus	Anseriformes	14.7458	202	2.30535	-0.128675	2212.55	3.34489	0.650707	Herbivore		0.173967	-0.110184	Captive
18067	Anser_indicus	Anser_indicus	Anseriformes	15.007	207	2.31597	-0.118056	2212.55	3.34489	0.650707	Herbivore		0.173967	-0.110184	Captive
O10030	Grus_paradisea	Grus_paradisea	Gruiformes	27.2042	231	2.36361	-0.0704142	4540.62	3.65712	0.96293	Omnivore	-0.098833	-0.279585	0.0279848	Captive
O970291	Grus_paradisea	Grus_paradisea	Gruiformes	22.8352	209	2.32015	-0.11388	4540.62	3.65712	0.96293	Omnivore	-0.098833	-0.279585	0.0279848	Captive
13	Grus_virgo	Grus_virgo	Gruiformes	21.867	140	2.14613	-0.287898	2417	3.38328	0.689091	Omnivore	0.378152	-0.287363	-0.113108	Captive
14	Grus_virgo	Grus_virgo	Gruiformes	28.7761	277	2.44248	0.0084536	2417	3.38328	0.689091	Omnivore	0.378152	-0.287363	-0.113108	Captive
14	Grus_virgo	Grus_virgo	Gruiformes	25.2242	295	2.46982	0.0357958	2417	3.38328	0.689091	Omnivore	0.378152	-0.287363	-0.113108	Captive
KIP033PL3	Aptenodytes_patagonicus	Aptenodytes_patagonicus	Sphenisciformes	16.5906	234	2.36922	-0.0648103	11731.1	4.06934	1.37515	Aquatic predator	-0.138946	-0.592036	0.379536	Wild
KIP034PL3	Aptenodytes_patagonicus	Aptenodytes_patagonicus	Sphenisciformes	20.5791	207	2.31597	-0.118056	11731.1	4.06934	1.37515	Aquatic predator	-0.138946	-0.592036	0.379536	Wild
KIP036PL2	Aptenodytes_patagonicus	Aptenodytes_patagonicus	Sphenisciformes	11.4221	219	2.34044	-0.0935821	11731.1	4.06934	1.37515	Aquatic predator	-0.138946	-0.592036	0.379536	Wild
KIP037PL1	Aptenodytes_patagonicus	Aptenodytes_patagonicus	Sphenisciformes	15.1032	210	2.32222	-0.111807	11731.1	4.06934	1.37515	Aquatic predator	-0.138946	-0.592036	0.379536	Wild
KIP043PL2	Aptenodytes_patagonicus	Aptenodytes_patagonicus	Sphenisciformes	11.3807	226	2.35411	-0.0799177	11731.1	4.06934	1.37515	Aquatic predator	-0.138946	-0.592036	0.379536	Wild
100	Ara_ambiguus	Ara_ambiguus	Psittaciformes	13.0134	261	2.41664	-0.0173857	1300	3.11394	0.419758	Frugivore/granivore	0.202184		0.0318247	Captive
101	Ara_ambiguus	Ara_ambiguus	Psittaciformes	15.3664	273	2.43616	0.00213648	1300	3.11394	0.419758	Frugivore/granivore	0.202184		0.0318247	Captive
O03115	Ara_ambiguus	Ara_ambiguus	Psittaciformes	14.6212	278	2.44404	0.0100186	1300	3.11394	0.419758	Frugivore/granivore	0.202184		0.0318247	Captive
O018038	Ara_ambiguus	Ara_ambiguus	Psittaciformes	13.236	253	2.40312	-0.0309056	1300	3.11394	0.419758	Frugivore/granivore	0.202184		0.0318247	Captive
O018042	Ara_ambiguus	Ara_ambiguus	Psittaciformes	14.3979	295	2.46982	0.0357958	1300	3.11394	0.419758	Frugivore/granivore	0.202184		0.0318247	Captive
O018049	Ara_ambiguus	Ara_ambiguus	Psittaciformes	13.3335				1300	3.11394	0.419758	Frugivore/granivore	0.202184		0.0318247	Captive
O0980025	Ara_ambiguus	Ara_ambiguus	Psittaciformes	14.4415	252	2.4014	-0.0326256	1300	3.11394	0.419758	Frugivore/granivore	0.202184		0.0318247	Captive
90	Ara_glaucogularis	Ara_glaucogularis	Psittaciformes	16.4514	231	2.36361	-0.0704142	783.99	2.89431	0.200125	Frugivore/granivore	0.157819		0.108016	Captive
91	Ara_glaucogularis	Ara_glaucogularis	Psittaciformes	18.8744	259	2.4133	-0.0207264	783.99	2.89431	0.200125	Frugivore/granivore	0.157819		0.108016	Captive
92	Ara_glaucogularis	Ara_glaucogularis	Psittaciformes	16.353	226	2.35411	-0.0799177	783.99	2.89431	0.200125	Frugivore/granivore	0.157819		0.108016	Captive
93	Ara_glaucogularis	Ara_glaucogularis	Psittaciformes	15.7829	289	2.4609	0.0268717	783.99	2.89431	0.200125	Frugivore/granivore	0.157819		0.108016	Captive
94	Ara_glaucogularis	Ara_glaucogularis	Psittaciformes	23.386	298	2.47422	0.0401901	783.99	2.89431	0.200125	Frugivore/granivore	0.157819		0.108016	Captive
O09225	Ara_glaucogularis	Ara_glaucogularis	Psittaciformes	19.9492	238	2.37658	-0.0574492	783.99	2.89431	0.200125	Frugivore/granivore	0.157819		0.108016	Captive
O09226	Ara_glaucogularis	Ara_glaucogularis	Psittaciformes	14.6839	200	2.30103	-0.132996	783.99	2.89431	0.200125	Frugivore/granivore	0.157819		0.108016	Captive
34	Ara_militaris	Ara_militaris	Psittaciformes	16.5232	234	2.36922	-0.0648103	1134	3.05461	0.360427	Frugivore/granivore	0.273466			Captive
84	Ara_militaris	Ara_militaris	Psittaciformes	14.345	291	2.46389	0.0298668	1134	3.05461	0.360427	Frugivore/granivore	0.273466			Captive
85	Ara_militaris	Ara_militaris	Psittaciformes	13.0231	277	2.44248	0.0084536	1134	3.05461	0.360427	Frugivore/granivore	0.273466			Captive
86	Ara_militaris	Ara_militaris	Psittaciformes	14.1825	280	2.44716	0.0131319	1134	3.05461	0.360427	Frugivore/granivore	0.273466			Captive
95	Aratinga_auricapillus	Aratinga_auricapillus	Psittaciformes	12.8577	221	2.34439	-0.0896339	130	2.11394	-0.580242	Frugivore/granivore	0.0986626			Captive
96	Aratinga_auricapillus	Aratinga_auricapillus	Psittaciformes	13.3367	224	2.35025	-0.0837782	130	2.11394	-0.580242	Frugivore/granivore	0.0986626			Captive
O10147	Aratinga_auricapillus	Aratinga_auricapillus	Psittaciformes	14.3121				130	2.11394	-0.580242	Frugivore/granivore	0.0986626			Captive
O09162	Aratinga_auricapillus	Aratinga_auricapillus	Psittaciformes	10.8034	227	2.35603	-0.0780003	130	2.11394	-0.580242	Frugivore/granivore	0.0986626			Captive
O11123	Aratinga_auricapillus	Aratinga_auricapillus	Psittaciformes	11.261	229	2.35984	-0.0741907	130	2.11394	-0.580242	Frugivore/granivore	0.0986626			Captive
O12066	Aratinga_auricapillus	Aratinga_auricapillus	Psittaciformes	11.961	212	2.32634	-0.10769	130	2.11394	-0.580242	Frugivore/granivore	0.0986626			Captive
O990100	Aratinga_auricapillus	Aratinga_auricapillus	Psittaciformes	12.934				130	2.11394	-0.580242	Frugivore/granivore	0.0986626			Captive
161	Aythya_baeri	Aythya_baeri	Anseriformes	11.6334	244	2.38739	-0.0466363	681.23	2.83329	0.139108	Omnivore	-0.173719	0.173639		Captive
162	Aythya_baeri	Aythya_baeri	Anseriformes	10.1539	185	2.26717	-0.166854	681.23	2.83329	0.139108	Omnivore	-0.173719	0.173639		Captive
173	Aythya_baeri	Aythya_baeri	Anseriformes	11.6033				681.23	2.83329	0.139108	Omnivore	-0.173719	0.173639		Captive
174	Aythya_baeri	Aythya_baeri	Anseriformes	11.0085	176	2.24551	-0.188514	681.23	2.83329	0.139108	Omnivore	-0.173719	0.173639		Captive
175	Aythya_baeri	Aythya_baeri	Anseriformes	10.0374				681.23	2.83329	0.139108	Omnivore	-0.173719	0.173639		Captive
O08132	Balearica_pavonina	Balearica_pavonina	Gruiformes	21.4122	193	2.28556	-0.148469	3590	3.55509	0.860909	Omnivore	-0.243322	-0.227533	-0.132346	Captive
O06005	Balearica_pavonina	Balearica_pavonina	Gruiformes	13.9545	164	2.21484	-0.219182	3590	3.55509	0.860909	Omnivore	-0.243322	-0.227533	-0.132346	Captive
O150112940	Branta_hutchinsii	Branta_hutchinsii	Anseriformes	12.3434	182	2.26007	-0.173955	2811.68	3.44897	0.75478	Herbivore	0.163608	0.191801	-0.176976	Captive
O0181	Branta_leucopsis	Branta_leucopsis	Anseriformes	14.1265	212	2.32634	-0.10769	1683.97	3.22633	0.532149	Herbivore	0.0298102	0.0620636	-0.194159	Captive
O0182	Branta_leucopsis	Branta_leucopsis	Anseriformes	14.7633	240	2.38021	-0.0538149	1683.97	3.22633	0.532149	Herbivore	0.0298102	0.0620636	-0.194159	Captive
O0184	Branta_leucopsis	Branta_leucopsis	Anseriformes	15.6326	172	2.23553	-0.198498	1683.97	3.22633	0.532149	Herbivore	0.0298102	0.0620636	-0.194159	Captive
61	Branta_ruficollis	Branta_ruficollis	Anseriformes	14.1228	227	2.35603	-0.0780003	1226.47	3.08866	0.394471	Herbivore	-0.0731454	0.133666	-0.184689	Captive
62	Branta_ruficollis	Branta_ruficollis	Anseriformes	12.7213	236	2.37291	-0.0611142	1226.47	3.08866	0.394471	Herbivore	-0.0731454	0.133666	-0.184689	Captive
63	Branta_ruficollis	Branta_ruficollis	Anseriformes	12.7771	352	2.54654	0.112516	1226.47	3.08866	0.394471	Herbivore	-0.0731454	0.133666	-0.184689	Captive
O06106	Bubo_bubo	Bubo_bubo	Strigiformes	26.6096				2668.51	3.42627	0.732083	Terrestrial carnivore	0.376917	-0.515194	-0.113581	Captive
O08048	Bubo_scandiaca	Bubo_scandiaca	Strigiformes	24.1582	361	2.55751	0.123481	2028.76	3.30723	0.613045	Terrestrial carnivore	0.0128015	-0.0947751	-0.138031	Captive
O15099	Bubo_scandiaca	Bubo_scandiaca	Strigiformes	27.8382	252	2.4014	-0.0326256	2028.76	3.30723	0.613045	Terrestrial carnivore	0.0128015	-0.0947751	-0.138031	Captive
O18099	Bubo_scandiaca	Bubo_scandiaca	Strigiformes	24.4888				2028.76	3.30723	0.613045	Terrestrial carnivore	0.0128015	-0.0947751	-0.138031	Captive
O18100	Bubo_scandiaca	Bubo_scandiaca	Strigiformes	24.7111				2028.76	3.30723	0.613045	Terrestrial carnivore	0.0128015	-0.0947751	-0.138031	Captive
O18102	Bubo_scandiaca	Bubo_scandiaca	Strigiformes	21.667				2028.76	3.30723	0.613045	Terrestrial carnivore	0.0128015	-0.0947751	-0.138031	Captive
O21035	Bubo_scandiaca	Bubo_scandiaca	Strigiformes	24.004				2028.76	3.30723	0.613045	Terrestrial carnivore	0.0128015	-0.0947751	-0.138031	Captive
O21031	Bubo_scandiaca	Bubo_scandiaca	Strigiformes	24.7633	294	2.46835	0.0343212	2028.76	3.30723	0.613045	Terrestrial carnivore	0.0128015	-0.0947751	-0.138031	Captive
42	Bucorvus_abyssinicus	Bucorvus_abyssinicus	Bucerotiformes	20.366	385	2.58546	0.151435	4000	3.60206	0.907874	Omnivore	0.358146	-0.537348	-0.0604489	Captive
43	Bucorvus_abyssinicus	Bucorvus_abyssinicus	Bucerotiformes	12.7074	304	2.48287	0.0488474	4000	3.60206	0.907874	Omnivore	0.358146	-0.537348	-0.0604489	Captive
44	Bucorvus_abyssinicus	Bucorvus_abyssinicus	Bucerotiformes	17.9598	353	2.54777	0.113749	4000	3.60206	0.907874	Omnivore	0.358146	-0.537348	-0.0604489	Captive
54	Bucorvus_abyssinicus	Bucorvus_abyssinicus	Bucerotiformes	16.7785	316	2.49969	0.0656609	4000	3.60206	0.907874	Omnivore	0.358146	-0.537348	-0.0604489	Captive
41	Bucorvus_cafer	Bucorvus_cafer	Bucerotiformes		332	2.52114	0.0871119	3743.62	3.57329	0.879106	Carnivore terrestrial	0.363278	-0.568788	-0.00244869	Captive
53	Bucorvus_cafer	Bucorvus_cafer	Bucerotiformes		305	2.4843	0.0502737	3743.62	3.57329	0.879106	Carnivore terrestrial	0.363278	-0.568788	-0.00244869	Captive
7	Bucorvus_cafer	Bucorvus_cafer	Bucerotiformes	23.4199	213	2.32838	-0.105647	3743.62	3.57329	0.879106	Carnivore terrestrial	0.363278	-0.568788	-0.00244869	Captive
8P	Bucorvus_cafer	Bucorvus_cafer	Bucerotiformes	22.5299	254	2.40483	-0.0291925	3743.62	3.57329	0.879106	Carnivore terrestrial	0.363278	-0.568788	-0.00244869	Captive
O5143	Bucorvus_cafer	Bucorvus_cafer	Bucerotiformes	20.1332				3743.62	3.57329	0.879106	Carnivore terrestrial	0.363278	-0.568788	-0.00244869	Captive
O5145	Bucorvus_cafer	Bucorvus_cafer	Bucerotiformes	20.5572				3743.62	3.57329	0.879106	Carnivore terrestrial	0.363278	-0.568788	-0.00244869	Captive
143	Burhinus_grallarius	Burhinus_grallarius	Charadriiformes	19.7253	238	2.37658	-0.0574492	648.07	2.81162	0.117436	Carnivore terrestrial	0.131177	-0.410566	0.00275928	Captive
144	Burhinus_grallarius	Burhinus_grallarius	Charadriiformes	24.5448				648.07	2.81162	0.117436	Carnivore terrestrial	0.131177	-0.410566	0.00275928	Captive
O07114	Burhinus_superciliaris	Burhinus_superciliaris	Charadriiformes	17.0013				480	2.68124	-0.0129444	Carnivore terrestrial	0.0575262			Captive
O11182	Cacatua_moluccensis	Cacatua_moluccensis	Psittaciformes	15.4619				834.99	2.92168	0.227496	Frugivore/granivore	0.473271	-0.662508	0.159493	Captive
O9110144	Cacatua_moluccensis	Cacatua_moluccensis	Psittaciformes	16.7809				834.99	2.92168	0.227496	Frugivore/granivore	0.473271	-0.662508	0.159493	Captive
15070	Caloenas_nicobarica	Caloenas_nicobarica	Columbiformes	19.2565				537.86	2.73067	0.0364836	Frugivore/granivore	0.248281	-0.888039		Captive
16003	Caloenas_nicobarica	Caloenas_nicobarica	Columbiformes	23.8325				537.86	2.73067	0.0364836	Frugivore/granivore	0.248281	-0.888039		Captive
121	Caloenas_nicobarica	Caloenas_nicobarica	Columbiformes	21.2011				537.86	2.73067	0.0364836	Frugivore/granivore	0.248281	-0.888039		Captive
122	Caloenas_nicobarica	Caloenas_nicobarica	Columbiformes	21.8421	221	2.34439	-0.0896339	537.86	2.73067	0.0364836	Frugivore/granivore	0.248281	-0.888039		Captive
123	Caloenas_nicobarica	Caloenas_nicobarica	Columbiformes	20.3135				537.86	2.73067	0.0364836	Frugivore/granivore	0.248281	-0.888039		Captive
127	Caloenas_nicobarica	Caloenas_nicobarica	Columbiformes	18.5928	211	2.32428	-0.109744	537.86	2.73067	0.0364836	Frugivore/granivore	0.248281	-0.888039		Captive
129	Caloenas_nicobarica	Caloenas_nicobarica	Columbiformes	19.2738	303	2.48144	0.0474165	537.86	2.73067	0.0364836	Frugivore/granivore	0.248281	-0.888039		Captive
6096761	Calonectris_diomedea	Calonectris_diomedea	Procelariiformes	35.8195	289	2.4609	0.0268717	534.99	2.72835	0.03416	Aquatic predator	0.143614	-0.353066	0.261165	Wild
6114890	Calonectris_diomedea	Calonectris_diomedea	Procelariiformes	38.6466	276	2.44091	0.00688291	534.99	2.72835	0.03416	Aquatic predator	0.143614	-0.353066	0.261165	Wild
6114984	Calonectris_diomedea	Calonectris_diomedea	Procelariiformes	35.0119	300	2.47712	0.0430951	534.99	2.72835	0.03416	Aquatic predator	0.143614	-0.353066	0.261165	Wild
6134827	Calonectris_diomedea	Calonectris_diomedea	Procelariiformes	37.4513	267	2.42651	-0.00751491	534.99	2.72835	0.03416	Aquatic predator	0.143614	-0.353066	0.261165	Wild
6187001	Calonectris_diomedea	Calonectris_diomedea	Procelariiformes	26.4119	214	2.33041	-0.103612	534.99	2.72835	0.03416	Aquatic predator	0.143614	-0.353066	0.261165	Wild
45	Cariama_cristata	Cariama_cristata	Cariamiformes	24.1429	384	2.58433	0.150305	1400	3.14613	0.451942	Omnivore		-0.340269	-0.256849	Captive
46	Cariama_cristata	Cariama_cristata	Cariamiformes	17.6305	335	2.52504	0.0910186	1400	3.14613	0.451942	Omnivore		-0.340269	-0.256849	Captive
50	Cariama_cristata	Cariama_cristata	Cariamiformes	24.2632	326	2.51322	0.0791914	1400	3.14613	0.451942	Omnivore		-0.340269	-0.256849	Captive
51	Cariama_cristata	Cariama_cristata	Cariamiformes	19.2962	356	2.55145	0.117424	1400	3.14613	0.451942	Omnivore		-0.340269	-0.256849	Captive
52	Cariama_cristata	Cariama_cristata	Cariamiformes	22.4462	274	2.43775	0.00372439	1400	3.14613	0.451942	Omnivore		-0.340269	-0.256849	Captive
2021-10-01	Casuarius_casuarius	Casuarius_casuarius	Casuariformes	11.4058				44000	4.64345	1.94927	Frugivore/granivore	0.112602	0.146079	0.204745	Captive
SKU05PL1	Catharacta_antarctica	Catharacta_antarctica	Charadriiformes	21.7065	258	2.41162	-0.0224065	1650	3.21748	0.523298	Carnivore terrestrial	0.119473	-0.294901	-0.154804	Wild
SKU09PL3	Catharacta_antarctica	Catharacta_antarctica	Charadriiformes	28.0836	253	2.40312	-0.0309056	1650	3.21748	0.523298	Carnivore terrestrial	0.119473	-0.294901	-0.154804	Wild
SKU8	Catharacta_antarctica	Catharacta_antarctica	Charadriiformes	18.7171	262	2.4183	-0.0157249	1650	3.21748	0.523298	Carnivore terrestrial	0.119473	-0.294901	-0.154804	Wild
SKU07PL2	Catharacta_antarctica	Catharacta_antarctica	Charadriiformes	20.0568	296	2.47129	0.0372655	1650	3.21748	0.523298	Carnivore terrestrial	0.119473	-0.294901	-0.154804	Wild
SKU6	Catharacta_antarctica	Catharacta_antarctica	Charadriiformes	24.529	236	2.37291	-0.0611142	1650	3.21748	0.523298	Carnivore terrestrial	0.119473	-0.294901	-0.154804	Wild
187	Chauna_torquata	Chauna_torquata	Anseriformes	14.5858				4400	3.64345	0.949267	Herbivore	0.0619667	-0.0343481	-0.0722447	Captive
188	Chauna_torquata	Chauna_torquata	Anseriformes	27.9828				4400	3.64345	0.949267	Herbivore	0.0619667	-0.0343481	-0.0722447	Captive
LSH037PL1	Chionis_minor	Chionis_minor	Charadriiformes	19.4213	206	2.31387	-0.120159	493.96	2.69369	-0.000493854	Omnivore	-0.178778	-0.316227	0.03083	Wild
LSH040PL2	Chionis_minor	Chionis_minor	Charadriiformes	18.5203	204	2.30963	-0.124396	493.96	2.69369	-0.000493854	Omnivore	-0.178778	-0.316227	0.03083	Wild
LSH045PL1	Chionis_minor	Chionis_minor	Charadriiformes	19.8159	208	2.31806	-0.115963	493.96	2.69369	-0.000493854	Omnivore	-0.178778	-0.316227	0.03083	Wild
LSH051PL2	Chionis_minor	Chionis_minor	Charadriiformes	19.9331	214	2.33041	-0.103612	493.96	2.69369	-0.000493854	Omnivore	-0.178778	-0.316227	0.03083	Wild
LSH053PL2	Chionis_minor	Chionis_minor	Charadriiformes	18.7566	219	2.34044	-0.0935821	493.96	2.69369	-0.000493854	Omnivore	-0.178778	-0.316227	0.03083	Wild
5	Ciconia_abdimii	Ciconia_abdimii	Ciconiiformes	24.894	193	2.28556	-0.148469	1398	3.14551	0.451322	Carnivore terrestrial	-0.0710526	-0.447549	-0.0690281	Captive
6	Ciconia_abdimii	Ciconia_abdimii	Ciconiiformes	20.8173	248	2.39445	-0.0395745	1398	3.14551	0.451322	Carnivore terrestrial	-0.0710526	-0.447549	-0.0690281	Captive
7	Ciconia_abdimii	Ciconia_abdimii	Ciconiiformes	22.1888	275	2.43933	0.00530652	1398	3.14551	0.451322	Carnivore terrestrial	-0.0710526	-0.447549	-0.0690281	Captive
8	Ciconia_abdimii	Ciconia_abdimii	Ciconiiformes	22.6031	259	2.4133	-0.0207264	1398	3.14551	0.451322	Carnivore terrestrial	-0.0710526	-0.447549	-0.0690281	Captive
O09221	Ciconia_nigra	Ciconia_nigra	Ciconiiformes	21.2619	205	2.31175	-0.122272	2926	3.46627	0.772089	Aquatic predator	0.0328157	-0.268604	-0.0666222	Captive
O07048	Ciconia_nigra	Ciconia_nigra	Ciconiiformes	23.2376	263	2.41996	-0.0140704	2926	3.46627	0.772089	Aquatic predator	0.0328157	-0.268604	-0.0666222	Captive
65	Cygnus_atratus	Cygnus_atratus	Anseriformes	15.8728	182	2.26007	-0.173955	5623.16	3.74998	1.05579	Herbivore	0.0887205	0.267007	0.153977	Captive
68	Cygnus_atratus	Cygnus_atratus	Anseriformes	15.3231	131	2.11727	-0.316755	5623.16	3.74998	1.05579	Herbivore	0.0887205	0.267007	0.153977	Captive
82	Cygnus_atratus	Cygnus_atratus	Anseriformes	15.8544	214	2.33041	-0.103612	5623.16	3.74998	1.05579	Herbivore	0.0887205	0.267007	0.153977	Captive
83	Cygnus_atratus	Cygnus_atratus	Anseriformes	15.042	147	2.16732	-0.266709	5623.16	3.74998	1.05579	Herbivore	0.0887205	0.267007	0.153977	Captive
56	Dacelo_novaeguineae	Dacelo_novaeguineae	Coraciiformes	25.5351	304	2.48287	0.0488474	333.8	2.52349	-0.170699	Carnivore terrestrial	0.133592	-0.342869	-0.0747842	Captive
59	Dacelo_novaeguineae	Dacelo_novaeguineae	Coraciiformes	22.2573	369	2.56703	0.133	333.8	2.52349	-0.170699	Carnivore terrestrial	0.133592	-0.342869	-0.0747842	Captive
134	Dendrocygna_bicolor	Dendrocygna_bicolor	Anseriformes	12.3394	183	2.26245	-0.171575	756.37	2.87873	0.184549	Herbivore	-0.0356969	0.276079	0.0094486	Captive
135	Dendrocygna_bicolor	Dendrocygna_bicolor	Anseriformes	12.6227				756.37	2.87873	0.184549	Herbivore	-0.0356969	0.276079	0.0094486	Captive
O06069	Dendrocygna_eytoni	Dendrocygna_eytoni	Anseriformes	10.9201				789.99	2.89762	0.203436	Herbivore	-0.082532	0.16038	0.00495288	Captive
O06068	Dendrocygna_eytoni	Dendrocygna_eytoni	Anseriformes	13.6821				789.99	2.89762	0.203436	Herbivore	-0.082532	0.16038	0.00495288	Captive
O14088	Dendrocygna_eytoni	Dendrocygna_eytoni	Anseriformes	14.3567				789.99	2.89762	0.203436	Herbivore	-0.082532	0.16038	0.00495288	Captive
O14087	Dendrocygna_eytoni	Dendrocygna_eytoni	Anseriformes	9.20406				789.99	2.89762	0.203436	Herbivore	-0.082532	0.16038	0.00495288	Captive
O14092	Dendrocygna_viduata	Dendrocygna_viduata	Anseriformes	12.762	291	2.46389	0.0298668	689.99	2.83884	0.144657	Omnivore	0.0805639	0.0670531	0.0654369	Captive
130	Dendrocygna_viduata	Dendrocygna_viduata	Anseriformes	12.0823	261	2.41664	-0.0173857	689.99	2.83884	0.144657	Omnivore	0.0805639	0.0670531	0.0654369	Captive
131	Dendrocygna_viduata	Dendrocygna_viduata	Anseriformes	10.4162	239	2.3784	-0.0556283	689.99	2.83884	0.144657	Omnivore	0.0805639	0.0670531	0.0654369	Captive
132	Dendrocygna_viduata	Dendrocygna_viduata	Anseriformes	11.0534	231	2.36361	-0.0704142	689.99	2.83884	0.144657	Omnivore	0.0805639	0.0670531	0.0654369	Captive
133	Dendrocygna_viduata	Dendrocygna_viduata	Anseriformes	12.7222	163	2.21219	-0.221839	689.99	2.83884	0.144657	Omnivore	0.0805639	0.0670531	0.0654369	Captive
15007	Ducula_bicolor	Ducula_bicolor	Columbiformes	23.9808				440.01	2.64346	-0.0507231	Frugivore/granivore	0.252256	-0.870208		Captive
18012	Ducula_bicolor	Ducula_bicolor	Columbiformes	20.691				440.01	2.64346	-0.0507231	Frugivore/granivore	0.252256	-0.870208		Captive
14093	Ducula_bicolor	Ducula_bicolor	Columbiformes	23.9851				440.01	2.64346	-0.0507231	Frugivore/granivore	0.252256	-0.870208		Captive
17068	Ducula_bicolor	Ducula_bicolor	Columbiformes	27.497				440.01	2.64346	-0.0507231	Frugivore/granivore	0.252256	-0.870208		Captive
14013	Ducula_bicolor	Ducula_bicolor	Columbiformes	23.3331				440.01	2.64346	-0.0507231	Frugivore/granivore	0.252256	-0.870208		Captive
B08PL1	Erithacus_rubecula	Erithacus_rubecula	Passeriformes	16.0218	325	2.51188	0.0778572	17.7	1.24797	-1.44621	Omnivore	0.219305	-0.403527	-0.109994	Wild
B10PL1	Erithacus_rubecula	Erithacus_rubecula	Passeriformes	13.7829	395	2.5966	0.162571	17.7	1.24797	-1.44621	Omnivore	0.219305	-0.403527	-0.109994	Wild
B13PL1	Erithacus_rubecula	Erithacus_rubecula	Passeriformes	18.6174	329	2.5172	0.0831697	17.7	1.24797	-1.44621	Omnivore	0.219305	-0.403527	-0.109994	Wild
B14PL2	Erithacus_rubecula	Erithacus_rubecula	Passeriformes	17.3282	294	2.46835	0.0343212	17.7	1.24797	-1.44621	Omnivore	0.219305	-0.403527	-0.109994	Wild
B15PL1	Erithacus_rubecula	Erithacus_rubecula	Passeriformes	18.9897	314	2.49693	0.0629035	17.7	1.24797	-1.44621	Omnivore	0.219305	-0.403527	-0.109994	Wild
109	Eudocimus_ruber	Eudocimus_ruber	Pelecaniformes	16.9742	250	2.39794	-0.0360862	660.08	2.8196	0.125411	Aquatic predator	0.286102	-0.44712	-0.134543	Captive
110	Eudocimus_ruber	Eudocimus_ruber	Pelecaniformes	14.4396	231	2.36361	-0.0704142	660.08	2.8196	0.125411	Aquatic predator	0.286102	-0.44712	-0.134543	Captive
111	Eudocimus_ruber	Eudocimus_ruber	Pelecaniformes	20.774	295	2.46982	0.0357958	660.08	2.8196	0.125411	Aquatic predator	0.286102	-0.44712	-0.134543	Captive
113	Eudocimus_ruber	Eudocimus_ruber	Pelecaniformes	13.4154	233	2.36736	-0.0666702	660.08	2.8196	0.125411	Aquatic predator	0.286102	-0.44712	-0.134543	Captive
114	Eudocimus_ruber	Eudocimus_ruber	Pelecaniformes	15.8294	212	2.32634	-0.10769	660.08	2.8196	0.125411	Aquatic predator	0.286102	-0.44712	-0.134543	Captive
115	Eudocimus_ruber	Eudocimus_ruber	Pelecaniformes	15.5118	246	2.39094	-0.0430911	660.08	2.8196	0.125411	Aquatic predator	0.286102	-0.44712	-0.134543	Captive
MAC028	Eudyptes_chrysolophus	Eudyptes_chrysolophus	Sphenisciformes	16.2782	208	2.31806	-0.115963	4485.08	3.65177	0.957585	Aquatic predator	-0.19479	-0.391843	-0.115033	Wild
MAC029	Eudyptes_chrysolophus	Eudyptes_chrysolophus	Sphenisciformes	15.4548	123	2.08991	-0.344121	4485.08	3.65177	0.957585	Aquatic predator	-0.19479	-0.391843	-0.115033	Wild
MAC030	Eudyptes_chrysolophus	Eudyptes_chrysolophus	Sphenisciformes	18.1607	213	2.32838	-0.105647	4485.08	3.65177	0.957585	Aquatic predator	-0.19479	-0.391843	-0.115033	Wild
MAC032	Eudyptes_chrysolophus	Eudyptes_chrysolophus	Sphenisciformes	15.7848	236	2.37291	-0.0611142	4485.08	3.65177	0.957585	Aquatic predator	-0.19479	-0.391843	-0.115033	Wild
MAC037	Eudyptes_chrysolophus	Eudyptes_chrysolophus	Sphenisciformes	13.9361	206	2.31387	-0.120159	4485.08	3.65177	0.957585	Aquatic predator	-0.19479	-0.391843	-0.115033	Wild
005	Limosa_limosa	Limosa_limosa	Charadriiformes	21.5493	297	2.47276	0.0387303	288.37	2.45995	-0.234236	Omnivore	0.190278	0.00637547	-0.130242	Wild
010	Limosa_limosa	Limosa_limosa	Charadriiformes	18.6716	282	2.45025	0.0162229	288.37	2.45995	-0.234236	Omnivore	0.190278	0.00637547	-0.130242	Wild
015	Limosa_limosa	Limosa_limosa	Charadriiformes	21.5838	303	2.48144	0.0474165	288.37	2.45995	-0.234236	Omnivore	0.190278	0.00637547	-0.130242	Wild
020	Limosa_limosa	Limosa_limosa	Charadriiformes	19.7059	228	2.35793	-0.0760913	288.37	2.45995	-0.234236	Omnivore	0.190278	0.00637547	-0.130242	Wild
280	Limosa_limosa	Limosa_limosa	Charadriiformes	19.6465	239	2.3784	-0.0556283	288.37	2.45995	-0.234236	Omnivore	0.190278	0.00637547	-0.130242	Wild
286	Limosa_limosa	Limosa_limosa	Charadriiformes	23.2651	370	2.5682	0.134176	288.37	2.45995	-0.234236	Omnivore	0.190278	0.00637547	-0.130242	Wild
803	Sterna_nilotica	Sterna_nilotica	Charadriiformes	17.2558	479	2.68034	0.246309	218.25	2.33895	-0.355231	Aquatic predator	-0.00434534	-0.152467	-0.0786331	Wild
942	Sterna_nilotica	Sterna_nilotica	Charadriiformes	19.9061	295	2.46982	0.0357958	218.25	2.33895	-0.355231	Aquatic predator	-0.00434534	-0.152467	-0.0786331	Wild
956	Sterna_nilotica	Sterna_nilotica	Charadriiformes	17.6928	348	2.54158	0.107553	218.25	2.33895	-0.355231	Aquatic predator	-0.00434534	-0.152467	-0.0786331	Wild
968	Sterna_nilotica	Sterna_nilotica	Charadriiformes	19.4998	442	2.64542	0.211396	218.25	2.33895	-0.355231	Aquatic predator	-0.00434534	-0.152467	-0.0786331	Wild
972	Sterna_nilotica	Sterna_nilotica	Charadriiformes	19.0962	400	2.60206	0.168034	218.25	2.33895	-0.355231	Aquatic predator	-0.00434534	-0.152467	-0.0786331	Wild
960	Sterna_nilotica	Sterna_nilotica	Charadriiformes	18.0148	390	2.59106	0.157038	218.25	2.33895	-0.355231	Aquatic predator	-0.00434534	-0.152467	-0.0786331	Wild
35	Balearica_regulorum	Balearica_regulorum	Gruiformes	21.4489	271	2.43297	-0.00105688	3771.99	3.57657	0.882385	Omnivore	-0.0478356	-0.223489	-0.15421	Captive
36	Balearica_regulorum	Balearica_regulorum	Gruiformes	20.2632	278	2.44404	0.0100186	3771.99	3.57657	0.882385	Omnivore	-0.0478356	-0.223489	-0.15421	Captive
37	Balearica_regulorum	Balearica_regulorum	Gruiformes	21.8876	237	2.37475	-0.0592778	3771.99	3.57657	0.882385	Omnivore	-0.0478356	-0.223489	-0.15421	Captive
38	Balearica_regulorum	Balearica_regulorum	Gruiformes	22.9	221	2.34439	-0.0896339	3771.99	3.57657	0.882385	Omnivore	-0.0478356	-0.223489	-0.15421	Captive
55	Balearica_regulorum	Balearica_regulorum	Gruiformes	24.4545	217	2.33646	-0.0975664	3771.99	3.57657	0.882385	Omnivore	-0.0478356	-0.223489	-0.15421	Captive
74	Geronticus_eremita	Geronticus_eremita	Pelecaniformes	19.3889	252	2.4014	-0.0326256	1202	3.0799	0.385719	Carnivore terrestrial	0.174398	-0.216987	-0.134121	Captive
75	Geronticus_eremita	Geronticus_eremita	Pelecaniformes	19.8701	259	2.4133	-0.0207264	1202	3.0799	0.385719	Carnivore terrestrial	0.174398	-0.216987	-0.134121	Captive
76	Geronticus_eremita	Geronticus_eremita	Pelecaniformes	24.3358	283	2.45179	0.0177603	1202	3.0799	0.385719	Carnivore terrestrial	0.174398	-0.216987	-0.134121	Captive
77	Geronticus_eremita	Geronticus_eremita	Pelecaniformes	20.7776	214	2.33041	-0.103612	1202	3.0799	0.385719	Carnivore terrestrial	0.174398	-0.216987	-0.134121	Captive
78	Geronticus_eremita	Geronticus_eremita	Pelecaniformes	24.7601				1202	3.0799	0.385719	Carnivore terrestrial	0.174398	-0.216987	-0.134121	Captive
KER21K4001	Larus_dominicanus	Larus_dominicanus	Charadriiformes	26.841	328	2.51587	0.0818477	952.43	2.97883	0.284647	Aquatic predator	0.0555907	-0.156671	-0.0692264	Wild
KLP005	Larus_dominicanus	Larus_dominicanus	Charadriiformes	24.057	366	2.56348	0.129455	952.43	2.97883	0.284647	Aquatic predator	0.0555907	-0.156671	-0.0692264	Wild
KLP004	Larus_dominicanus	Larus_dominicanus	Charadriiformes	24.6329	321	2.50651	0.0724789	952.43	2.97883	0.284647	Aquatic predator	0.0555907	-0.156671	-0.0692264	Wild
KLP003	Larus_dominicanus	Larus_dominicanus	Charadriiformes	23.4144	300	2.47712	0.0430951	952.43	2.97883	0.284647	Aquatic predator	0.0555907	-0.156671	-0.0692264	Wild
KLP002	Larus_dominicanus	Larus_dominicanus	Charadriiformes	25.8523	326	2.51322	0.0791914	952.43	2.97883	0.284647	Aquatic predator	0.0555907	-0.156671	-0.0692264	Wild
16	Leptoptilos_crumeniferus	Leptoptilos_crumeniferus	Ciconiiformes	18.1699	269	2.42975	-0.00427389	6067.87	3.78304	1.08885	Carnivore terrestrial	0.131071	-0.435978	-0.0224107	Captive
17	Leptoptilos_crumeniferus	Leptoptilos_crumeniferus	Ciconiiformes	17.7428	273	2.43616	0.00213648	6067.87	3.78304	1.08885	Carnivore terrestrial	0.131071	-0.435978	-0.0224107	Captive
18	Leptoptilos_crumeniferus	Leptoptilos_crumeniferus	Ciconiiformes	17.3702	255	2.40654	-0.027486	6067.87	3.78304	1.08885	Carnivore terrestrial	0.131071	-0.435978	-0.0224107	Captive
39	Leptoptilos_crumeniferus	Leptoptilos_crumeniferus	Ciconiiformes	16.5316	253	2.40312	-0.0309056	6067.87	3.78304	1.08885	Carnivore terrestrial	0.131071	-0.435978	-0.0224107	Captive
40	Leptoptilos_crumeniferus	Leptoptilos_crumeniferus	Ciconiiformes	17.3593	273	2.43616	0.00213648	6067.87	3.78304	1.08885	Carnivore terrestrial	0.131071	-0.435978	-0.0224107	Captive
KRS005	Phalacrocorax_campbelli	Phalacrocorax_campbelli	Suliformes	14.0328	153	2.18469	-0.249335	2000	3.30103	0.606844	Aquatic predator	-0.39516	-0.535846	-0.108594	Wild
KRS004	Phalacrocorax_campbelli	Phalacrocorax_campbelli	Suliformes	14.1649	144	2.15836	-0.275664	2000	3.30103	0.606844	Aquatic predator	-0.39516	-0.535846	-0.108594	Wild
KRS003	Phalacrocorax_campbelli	Phalacrocorax_campbelli	Suliformes	12.2216	169	2.22789	-0.206139	2000	3.30103	0.606844	Aquatic predator	-0.39516	-0.535846	-0.108594	Wild
KRS001	Phalacrocorax_campbelli	Phalacrocorax_campbelli	Suliformes	13.6406	225	2.35218	-0.0818437	2000	3.30103	0.606844	Aquatic predator	-0.39516	-0.535846	-0.108594	Wild
KRS002	Phalacrocorax_campbelli	Phalacrocorax_campbelli	Suliformes	11.8229	166	2.22011	-0.213918	2000	3.30103	0.606844	Aquatic predator	-0.39516	-0.535846	-0.108594	Wild
136	Leucopsar_rothschildi	Leucopsar_rothschildi	Passeriformes	19.8577	488	2.68842	0.254394	91.3	1.96047	-0.733715	Omnivore	0.283016	-0.568609	-0.162619	Captive
137	Leucopsar_rothschildi	Leucopsar_rothschildi	Passeriformes	17.9181				91.3	1.96047	-0.733715	Omnivore	0.283016	-0.568609	-0.162619	Captive
C12054	Lophophorus_impejanus	Lophophorus_impejanus	Galliformes	19.5984	198	2.29667	-0.137361	2066.51	3.31524	0.621052	Omnivore		-0.0772349		Captive
O12138	Lophophorus_impejanus	Lophophorus_impejanus	Galliformes	18.6607	224	2.35025	-0.0837782	2066.51	3.31524	0.621052	Omnivore		-0.0772349		Captive
178	Lophotibis_cristata	Lophotibis_cristata	Pelecaniformes	15.1765	219	2.34044	-0.0935821	583	2.76567	0.0714829	Carnivore terrestrial	0.042465			Captive
179	Lophotibis_cristata	Lophotibis_cristata	Pelecaniformes	15.2568				583	2.76567	0.0714829	Carnivore terrestrial	0.042465			Captive
138	Lophura_edwardsi	Lophura_edwardsi	Galliformes	16.409				1090.96	3.03781	0.343623	Omnivore	0.0286795			Captive
139	Lophura_edwardsi	Lophura_edwardsi	Galliformes	17.0529	280	2.44716	0.0131319	1090.96	3.03781	0.343623	Omnivore	0.0286795			Captive
SGP2	Macronectes_giganteus	Macronectes_giganteus	Procelariiformes	26.2543				3591.69	3.5553	0.861113	Carnivore terrestrial	0.193488	-0.408507	0.151884	Captive
SGP3	Macronectes_giganteus	Macronectes_giganteus	Procelariiformes	21.6595				3591.69	3.5553	0.861113	Carnivore terrestrial	0.193488	-0.408507	0.151884	Captive
SGP4	Macronectes_giganteus	Macronectes_giganteus	Procelariiformes	23.8516				3591.69	3.5553	0.861113	Carnivore terrestrial	0.193488	-0.408507	0.151884	Captive
SGP09	Macronectes_giganteus	Macronectes_giganteus	Procelariiformes	28	232	2.36549	-0.0685382	3591.69	3.5553	0.861113	Carnivore terrestrial	0.193488	-0.408507	0.151884	Captive
SGP10	Macronectes_giganteus	Macronectes_giganteus	Procelariiformes	25	234	2.36922	-0.0648103	3591.69	3.5553	0.861113	Carnivore terrestrial	0.193488	-0.408507	0.151884	Captive
SGP11	Macronectes_giganteus	Macronectes_giganteus	Procelariiformes	27	249	2.3962	-0.0378268	3591.69	3.5553	0.861113	Carnivore terrestrial	0.193488	-0.408507	0.151884	Captive
NGP006PL3	Macronectes_halli	Macronectes_halli	Procelariiformes	19.0827	308	2.48855	0.0545245	4206.3	3.6239	0.929715	Carnivore terrestrial	0.0581555	-0.429617	0.123181	Wild
NGP007PL2	Macronectes_halli	Macronectes_halli	Procelariiformes	16.0958	243	2.38561	-0.0484199	4206.3	3.6239	0.929715	Carnivore terrestrial	0.0581555	-0.429617	0.123181	Wild
NGP8	Macronectes_halli	Macronectes_halli	Procelariiformes		224	2.35025	-0.0837782	4206.3	3.6239	0.929715	Carnivore terrestrial	0.0581555	-0.429617	0.123181	Wild
NGP026PL2	Macronectes_halli	Macronectes_halli	Procelariiformes		243	2.38561	-0.0484199	4206.3	3.6239	0.929715	Carnivore terrestrial	0.0581555	-0.429617	0.123181	Wild
NGP02709PL2	Macronectes_halli	Macronectes_halli	Procelariiformes	16.6434	226	2.35411	-0.0799177	4206.3	3.6239	0.929715	Carnivore terrestrial	0.0581555	-0.429617	0.123181	Wild
137M09	Musophaga_rossae	Musophaga_rossae	Musophagiformes	23.0028				361.42	2.55801	-0.136173	Frugivore/granivore	0.146456	-0.252509	-0.1328	Captive
O17112	Musophaga_rossae	Musophaga_rossae	Musophagiformes	16.3126				361.42	2.55801	-0.136173	Frugivore/granivore	0.146456	-0.252509	-0.1328	Captive
151	Neophron_percnopterus	Neophron_percnopterus	Accipitriformes	18.2804	229	2.35984	-0.0741907	2082	3.31848	0.624295	Carnivore terrestrial	0.197105	-0.385352	0.0441929	Captive
152	Neophron_percnopterus	Neophron_percnopterus	Accipitriformes	26.4125	259	2.4133	-0.0207264	2082	3.31848	0.624295	Carnivore terrestrial	0.197105	-0.385352	0.0441929	Captive
140	Nesoenas_mayeri	Nesoenas_mayeri	Columbiformes	24.8791				302.76	2.4811	-0.213087	Herbivore	-0.0317087		-0.311367	Captive
145	Nesoenas_mayeri	Nesoenas_mayeri	Columbiformes					302.76	2.4811	-0.213087	Herbivore	-0.0317087		-0.311367	Captive
146	Nesoenas_mayeri	Nesoenas_mayeri	Columbiformes	21.6931	505	2.70329	0.269265	302.76	2.4811	-0.213087	Herbivore	-0.0317087		-0.311367	Captive
172	Nesoenas_mayeri	Nesoenas_mayeri	Columbiformes	21.6148				302.76	2.4811	-0.213087	Herbivore	-0.0317087		-0.311367	Captive
190	Nesoenas_mayeri	Nesoenas_mayeri	Columbiformes	20.2323				302.76	2.4811	-0.213087	Herbivore	-0.0317087		-0.311367	Captive
102	Numida_meleagris	Numida_meleagris	Galliformes	17.6703	279	2.4456	0.011578	1299	3.11361	0.419424	Omnivore	0.0915457	-0.00788714	-0.249109	Captive
103	Numida_meleagris	Numida_meleagris	Galliformes	16.513	338	2.52892	0.0948905	1299	3.11361	0.419424	Omnivore	0.0915457	-0.00788714	-0.249109	Captive
104	Numida_meleagris	Numida_meleagris	Galliformes	17.559				1299	3.11361	0.419424	Omnivore	0.0915457	-0.00788714	-0.249109	Captive
105	Numida_meleagris	Numida_meleagris	Galliformes	18.9115	376	2.57519	0.141162	1299	3.11361	0.419424	Omnivore	0.0915457	-0.00788714	-0.249109	Captive
106	Numida_meleagris	Numida_meleagris	Galliformes	15.8618	440	2.64345	0.209427	1299	3.11361	0.419424	Omnivore	0.0915457	-0.00788714	-0.249109	Captive
28	Ortalis_canicollis	Ortalis_canicollis	Galliformes					539	2.73159	0.0374031	Omnivore				Captive
29	Ortalis_canicollis	Ortalis_canicollis	Galliformes	17.7451	336	2.52634	0.0923131	539	2.73159	0.0374031	Omnivore				Captive
30	Ortalis_canicollis	Ortalis_canicollis	Galliformes	19.2874	355	2.55023	0.116202	539	2.73159	0.0374031	Omnivore				Captive
31	Ortalis_canicollis	Ortalis_canicollis	Galliformes	16.809	296	2.47129	0.0372655	539	2.73159	0.0374031	Omnivore				Captive
870138	Pelecanus_crispus	Pelecanus_crispus	Pelecaniformes	21.7874	234	2.36922	-0.0648103	9512.09	3.97828	1.28409	Aquatic predator	0.00223696	-0.320529	-0.11823	Captive
66	Pelecanus_crispus	Pelecanus_crispus	Pelecaniformes	20.7062	172	2.23553	-0.198498	9512.09	3.97828	1.28409	Aquatic predator	0.00223696	-0.320529	-0.11823	Captive
19	Pelecanus_onocrotalus	Pelecanus_onocrotalus	Pelecaniformes	16.604	264	2.4216	-0.0124222	9322.31	3.96952	1.27534	Aquatic predator	0.155066	-0.465856	-0.175944	Captive
20	Pelecanus_onocrotalus	Pelecanus_onocrotalus	Pelecaniformes	18.4652	251	2.39967	-0.0343524	9322.31	3.96952	1.27534	Aquatic predator	0.155066	-0.465856	-0.175944	Captive
21	Pelecanus_onocrotalus	Pelecanus_onocrotalus	Pelecaniformes	19.7351	298	2.47422	0.0401901	9322.31	3.96952	1.27534	Aquatic predator	0.155066	-0.465856	-0.175944	Captive
22	Pelecanus_onocrotalus	Pelecanus_onocrotalus	Pelecaniformes	17.7842	260	2.41497	-0.0190528	9322.31	3.96952	1.27534	Aquatic predator	0.155066	-0.465856	-0.175944	Captive
23	Pelecanus_onocrotalus	Pelecanus_onocrotalus	Pelecaniformes	19.7732	359	2.55509	0.121068	9322.31	3.96952	1.27534	Aquatic predator	0.155066	-0.465856	-0.175944	Captive
O1864	Phoenicopterus_roseus	Phoenicopterus_roseus	Phoenicopteriformes	9.8485				3031.59	3.48167	0.787485	Omnivore	0.453603	-0.598123	-0.0702869	Captive
O940145	Phoenicopterus_roseus	Phoenicopterus_roseus	Phoenicopteriformes	10.1931				3031.59	3.48167	0.787485	Omnivore	0.453603	-0.598123	-0.0702869	Captive
O18132	Phoenicopterus_roseus	Phoenicopterus_roseus	Phoenicopteriformes	10.7131				3031.59	3.48167	0.787485	Omnivore	0.453603	-0.598123	-0.0702869	Captive
O18111	Phoenicopterus_roseus	Phoenicopterus_roseus	Phoenicopteriformes	12.3679				3031.59	3.48167	0.787485	Omnivore	0.453603	-0.598123	-0.0702869	Captive
O18103	Phoenicopterus_roseus	Phoenicopterus_roseus	Phoenicopteriformes	10.4632				3031.59	3.48167	0.787485	Omnivore	0.453603	-0.598123	-0.0702869	Captive
O18087	Phoenicopterus_roseus	Phoenicopterus_roseus	Phoenicopteriformes	9.15256				3031.59	3.48167	0.787485	Omnivore	0.453603	-0.598123	-0.0702869	Captive
O18077	Phoenicopterus_roseus	Phoenicopterus_roseus	Phoenicopteriformes	10.2149				3031.59	3.48167	0.787485	Omnivore	0.453603	-0.598123	-0.0702869	Captive
O18072	Phoenicopterus_roseus	Phoenicopterus_roseus	Phoenicopteriformes	12.4064				3031.59	3.48167	0.787485	Omnivore	0.453603	-0.598123	-0.0702869	Captive
O18066	Phoenicopterus_roseus	Phoenicopterus_roseus	Phoenicopteriformes	9.90013				3031.59	3.48167	0.787485	Omnivore	0.453603	-0.598123	-0.0702869	Captive
O18030	Phoenicopterus_roseus	Phoenicopterus_roseus	Phoenicopteriformes	11.0088				3031.59	3.48167	0.787485	Omnivore	0.453603	-0.598123	-0.0702869	Captive
O12094	Phoenicopterus_roseus	Phoenicopterus_roseus	Phoenicopteriformes	10.7208				3031.59	3.48167	0.787485	Omnivore	0.453603	-0.598123	-0.0702869	Captive
O11107	Phoenicopterus_roseus	Phoenicopterus_roseus	Phoenicopteriformes	11.6373				3031.59	3.48167	0.787485	Omnivore	0.453603	-0.598123	-0.0702869	Captive
O10133	Phoenicopterus_roseus	Phoenicopterus_roseus	Phoenicopteriformes	10.5369				3031.59	3.48167	0.787485	Omnivore	0.453603	-0.598123	-0.0702869	Captive
O10068	Phoenicopterus_roseus	Phoenicopterus_roseus	Phoenicopteriformes	11.0224				3031.59	3.48167	0.787485	Omnivore	0.453603	-0.598123	-0.0702869	Captive
O1873	Phoenicopterus_roseus	Phoenicopterus_roseus	Phoenicopteriformes	11.6956				3031.59	3.48167	0.787485	Omnivore	0.453603	-0.598123	-0.0702869	Captive
14	Phoenicopterus_ruber	Phoenicopterus_ruber	Phoenicopteriformes	10.1821	105	2.02119	-0.412837	3031.59	3.48167	0.787485	Omnivore	0.354069	-0.598123	-0.0702869	Captive
15	Phoenicopterus_ruber	Phoenicopterus_ruber	Phoenicopteriformes	9.95036	123	2.08991	-0.344121	3031.59	3.48167	0.787485	Omnivore	0.354069	-0.598123	-0.0702869	Captive
16	Phoenicopterus_ruber	Phoenicopterus_ruber	Phoenicopteriformes	10.644	117	2.06819	-0.36584	3031.59	3.48167	0.787485	Omnivore	0.354069	-0.598123	-0.0702869	Captive
17	Phoenicopterus_ruber	Phoenicopterus_ruber	Phoenicopteriformes	11.2354				3031.59	3.48167	0.787485	Omnivore	0.354069	-0.598123	-0.0702869	Captive
22	Phoenicopterus_ruber	Phoenicopterus_ruber	Phoenicopteriformes	8.57481	196	2.29226	-0.14177	3031.59	3.48167	0.787485	Omnivore	0.354069	-0.598123	-0.0702869	Captive
25	Phoenicopterus_ruber	Phoenicopterus_ruber	Phoenicopteriformes	10.443	190	2.27875	-0.155273	3031.59	3.48167	0.787485	Omnivore	0.354069	-0.598123	-0.0702869	Captive
53	Phoenicopterus_ruber	Phoenicopterus_ruber	Phoenicopteriformes	9.55563				3031.59	3.48167	0.787485	Omnivore	0.354069	-0.598123	-0.0702869	Captive
57	Phoenicopterus_ruber	Phoenicopterus_ruber	Phoenicopteriformes					3031.59	3.48167	0.787485	Omnivore	0.354069	-0.598123	-0.0702869	Captive
WCP01PL2	Procellaria_aequinoctialis	Procellaria_aequinoctialis	Procelariiformes	14.119	325	2.51188	0.0778572	1213	3.08386	0.389675	Aquatic predator	0.0826121	-0.435399	0.204011	Wild
WCP02PL1	Procellaria_aequinoctialis	Procellaria_aequinoctialis	Procelariiformes	15.0664	247	2.3927	-0.0413292	1213	3.08386	0.389675	Aquatic predator	0.0826121	-0.435399	0.204011	Wild
WCP03PL2	Procellaria_aequinoctialis	Procellaria_aequinoctialis	Procelariiformes	13.5288	370	2.5682	0.134176	1213	3.08386	0.389675	Aquatic predator	0.0826121	-0.435399	0.204011	Wild
WCP05PL1	Procellaria_aequinoctialis	Procellaria_aequinoctialis	Procelariiformes	15.698	250	2.39794	-0.0360862	1213	3.08386	0.389675	Aquatic predator	0.0826121	-0.435399	0.204011	Wild
WCP6	Procellaria_aequinoctialis	Procellaria_aequinoctialis	Procelariiformes	13.9968	241	2.38202	-0.0520091	1213	3.08386	0.389675	Aquatic predator	0.0826121	-0.435399	0.204011	Wild
32	Psophia_crepitans	Psophia_crepitans	Gruiformes	21.6693	231	2.36361	-0.0704142	1026	3.01115	0.316962	Frugivore/granivore		-0.0090302	-0.123915	Captive
33	Psophia_crepitans	Psophia_crepitans	Gruiformes	24.0349	289	2.4609	0.0268717	1026	3.01115	0.316962	Frugivore/granivore		-0.0090302	-0.123915	Captive
87	Psophia_crepitans	Psophia_crepitans	Gruiformes	20.922	252	2.4014	-0.0326256	1026	3.01115	0.316962	Frugivore/granivore		-0.0090302	-0.123915	Captive
O02120	Platalea_ajaja	Platalea_ajaja	Pelecaniformes	12.9524				1490	3.17319	0.479001	Aquatic predator	0.0519539	-0.268947	-0.1282	Captive
O03088	Platalea_ajaja	Platalea_ajaja	Pelecaniformes	14.4848				1490	3.17319	0.479001	Aquatic predator	0.0519539	-0.268947	-0.1282	Captive
O12159	Platalea_ajaja	Platalea_ajaja	Pelecaniformes	14.3727	187	2.27184	-0.162185	1490	3.17319	0.479001	Aquatic predator	0.0519539	-0.268947	-0.1282	Captive
O13070	Platalea_ajaja	Platalea_ajaja	Pelecaniformes	12.0417				1490	3.17319	0.479001	Aquatic predator	0.0519539	-0.268947	-0.1282	Captive
O13073	Platalea_ajaja	Platalea_ajaja	Pelecaniformes	13.961	191	2.28103	-0.152993	1490	3.17319	0.479001	Aquatic predator	0.0519539	-0.268947	-0.1282	Captive
O13073	Platalea_ajaja	Platalea_ajaja	Pelecaniformes	13.961				1490	3.17319	0.479001	Aquatic predator	0.0519539	-0.268947	-0.1282	Captive
O14041	Platalea_ajaja	Platalea_ajaja	Pelecaniformes	11.6924				1490	3.17319	0.479001	Aquatic predator	0.0519539	-0.268947	-0.1282	Captive
GEP023PL2	Pygoscelis_papua	Pygoscelis_papua	Sphenisciformes	21.4927	183	2.26245	-0.171575	5932.95	3.77327	1.07909	Aquatic predator	0.0952896	-0.471931	-0.073052	Wild
GEP031PL3	Pygoscelis_papua	Pygoscelis_papua	Sphenisciformes	18.8543	177	2.24797	-0.186053	5932.95	3.77327	1.07909	Aquatic predator	0.0952896	-0.471931	-0.073052	Wild
GEP028PL2	Pygoscelis_papua	Pygoscelis_papua	Sphenisciformes	21.7592	203	2.3075	-0.12653	5932.95	3.77327	1.07909	Aquatic predator	0.0952896	-0.471931	-0.073052	Wild
GEP025PL2	Pygoscelis_papua	Pygoscelis_papua	Sphenisciformes	17.7007	216	2.33445	-0.0995724	5932.95	3.77327	1.07909	Aquatic predator	0.0952896	-0.471931	-0.073052	Wild
GEP024PL2	Pygoscelis_papua	Pygoscelis_papua	Sphenisciformes	16.4589	198	2.29667	-0.137361	5932.95	3.77327	1.07909	Aquatic predator	0.0952896	-0.471931	-0.073052	Wild
14108	Rhea_pennata	Rhea_pennata	Rheiformes	25.0701	175	2.24304	-0.190988	23900	4.3784	1.68421	Omnivore	-0.449353	0.766242		Captive
15104	Rhea_pennata	Rhea_pennata	Rheiformes	33.0726	183	2.26245	-0.171575	23900	4.3784	1.68421	Omnivore	-0.449353	0.766242		Captive
18076	Rhea_pennata	Rhea_pennata	Rheiformes	23.9088	216	2.33445	-0.0995724	23900	4.3784	1.68421	Omnivore	-0.449353	0.766242		Captive
82	Rhea_pennata	Rhea_pennata	Rheiformes	21.8071	148	2.17026	-0.263764	23900	4.3784	1.68421	Omnivore	-0.449353	0.766242		Captive
86	Rhea_pennata	Rhea_pennata	Rheiformes	22.1676				23900	4.3784	1.68421	Omnivore	-0.449353	0.766242		Captive
87	Rhea_pennata	Rhea_pennata	Rheiformes	22.5686	167	2.22272	-0.21131	23900	4.3784	1.68421	Omnivore	-0.449353	0.766242		Captive
88	Rhea_pennata	Rhea_pennata	Rheiformes	20.4916	154	2.18752	-0.246505	23900	4.3784	1.68421	Omnivore	-0.449353	0.766242		Captive
89	Rhea_pennata	Rhea_pennata	Rheiformes	21.2258	181	2.25768	-0.176348	23900	4.3784	1.68421	Omnivore	-0.449353	0.766242		Captive
83	Rhea_pennata	Rhea_pennata	Rheiformes	25.2616	186	2.26951	-0.164513	23900	4.3784	1.68421	Omnivore	-0.449353	0.766242		Captive
84	Rhea_pennata	Rhea_pennata	Rheiformes	22.2062				23900	4.3784	1.68421	Omnivore	-0.449353	0.766242		Captive
85	Rhea_pennata	Rhea_pennata	Rheiformes	23.7996	147	2.16732	-0.266709	23900	4.3784	1.68421	Omnivore	-0.449353	0.766242		Captive
64	Sarkidiornis_melanotos	Sarkidiornis_melanotos	Anseriformes	13.5656	258	2.41162	-0.0224065	2610	3.41664	0.722455	Omnivore	-0.121436	0.102733	-0.0698966	Captive
65	Sarkidiornis_melanotos	Sarkidiornis_melanotos	Anseriformes	12.2474	174	2.24055	-0.193477	2610	3.41664	0.722455	Omnivore	-0.121436	0.102733	-0.0698966	Captive
70	Sarkidiornis_melanotos	Sarkidiornis_melanotos	Anseriformes	13.4268	205	2.31175	-0.122272	2610	3.41664	0.722455	Omnivore	-0.121436	0.102733	-0.0698966	Captive
71	Sarkidiornis_melanotos	Sarkidiornis_melanotos	Anseriformes	13.6462	191	2.28103	-0.152993	2610	3.41664	0.722455	Omnivore	-0.121436	0.102733	-0.0698966	Captive
72	Sarkidiornis_melanotos	Sarkidiornis_melanotos	Anseriformes	13.076	207	2.31597	-0.118056	2610	3.41664	0.722455	Omnivore	-0.121436	0.102733	-0.0698966	Captive
163	Sarkidiornis_melanotos	Sarkidiornis_melanotos	Anseriformes	18.9836	179	2.25285	-0.181173	2610	3.41664	0.722455	Omnivore	-0.121436	0.102733	-0.0698966	Captive
177	Sarkidiornis_melanotos	Sarkidiornis_melanotos	Anseriformes	22.0524				2610	3.41664	0.722455	Omnivore	-0.121436	0.102733	-0.0698966	Captive
17104	Sarkidiornis_melanotos	Sarkidiornis_melanotos	Anseriformes	15.1605				2610	3.41664	0.722455	Omnivore	-0.121436	0.102733	-0.0698966	Captive
17106	Sarkidiornis_melanotos	Sarkidiornis_melanotos	Anseriformes	13.6591				2610	3.41664	0.722455	Omnivore	-0.121436	0.102733	-0.0698966	Captive
17105	Sarkidiornis_melanotos	Sarkidiornis_melanotos	Anseriformes	14.1495				2610	3.41664	0.722455	Omnivore	-0.121436	0.102733	-0.0698966	Captive
PDN 2022 20	Pagodroma_nivea	Pagodroma_nivea	Procelariiformes	15.1364	210	2.32222	-0.111807	268	2.42813	-0.266051	Aquatic predator	0.385225	-0.482323	0.128802	Wild
PDN 2022 21	Pagodroma_nivea	Pagodroma_nivea	Procelariiformes	16.5115	246	2.39094	-0.0430911	268	2.42813	-0.266051	Aquatic predator	0.385225	-0.482323	0.128802	Wild
PDN 2022 22	Pagodroma_nivea	Pagodroma_nivea	Procelariiformes	11.6484	265	2.42325	-0.0107803	268	2.42813	-0.266051	Aquatic predator	0.385225	-0.482323	0.128802	Wild
PDN 2022 23	Pagodroma_nivea	Pagodroma_nivea	Procelariiformes	13.0225	241	2.38202	-0.0520091	268	2.42813	-0.266051	Aquatic predator	0.385225	-0.482323	0.128802	Wild
PDN 2022 24	Pagodroma_nivea	Pagodroma_nivea	Procelariiformes	10.644	243	2.38561	-0.0484199	268	2.42813	-0.266051	Aquatic predator	0.385225	-0.482323	0.128802	Wild
PDN 2022 25	Pagodroma_nivea	Pagodroma_nivea	Procelariiformes	10.4863	204	2.30963	-0.124396	268	2.42813	-0.266051	Aquatic predator	0.385225	-0.482323	0.128802	Wild
PDN 2022 26	Pagodroma_nivea	Pagodroma_nivea	Procelariiformes	17.6326	246	2.39094	-0.0430911	268	2.42813	-0.266051	Aquatic predator	0.385225	-0.482323	0.128802	Wild
PDN 2022 27	Pagodroma_nivea	Pagodroma_nivea	Procelariiformes	16.4479	245	2.38917	-0.0448601	268	2.42813	-0.266051	Aquatic predator	0.385225	-0.482323	0.128802	Wild
PDN 2022 28	Pagodroma_nivea	Pagodroma_nivea	Procelariiformes	12.5871	221	2.34439	-0.0896339	268	2.42813	-0.266051	Aquatic predator	0.385225	-0.482323	0.128802	Wild
PDN 2022 29	Pagodroma_nivea	Pagodroma_nivea	Procelariiformes	13.3515	218	2.33846	-0.0955697	268	2.42813	-0.266051	Aquatic predator	0.385225	-0.482323	0.128802	Wild
4551738	Pagodroma_nivea	Pagodroma_nivea	Procelariiformes	16.6771	224	2.35025	-0.0837782	268	2.42813	-0.266051	Aquatic predator	0.385225	-0.482323	0.128802	Wild
4551739	Pagodroma_nivea	Pagodroma_nivea	Procelariiformes	18.0248	212	2.32634	-0.10769	268	2.42813	-0.266051	Aquatic predator	0.385225	-0.482323	0.128802	Wild
4551740	Pagodroma_nivea	Pagodroma_nivea	Procelariiformes	15.6407	234	2.36922	-0.0648103	268	2.42813	-0.266051	Aquatic predator	0.385225	-0.482323	0.128802	Wild
4551741	Pagodroma_nivea	Pagodroma_nivea	Procelariiformes	15.1343	248	2.39445	-0.0395745	268	2.42813	-0.266051	Aquatic predator	0.385225	-0.482323	0.128802	Wild
2085964	Pagodroma_nivea	Pagodroma_nivea	Procelariiformes	17.7761	255	2.40654	-0.027486	268	2.42813	-0.266051	Aquatic predator	0.385225	-0.482323	0.128802	Wild
2085982	Pagodroma_nivea	Pagodroma_nivea	Procelariiformes	22.9737	240	2.38021	-0.0538149	268	2.42813	-0.266051	Aquatic predator	0.385225	-0.482323	0.128802	Wild
E02PL2	Sylvia_atricapilla	Sylvia_atricapilla	Passeriformes	12.2085	296	2.47129	0.0372655	16.7	1.22272	-1.47147	Omnivore	0.0862094	-0.498458	-0.200892	Wild
E07PL1	Sylvia_atricapilla	Sylvia_atricapilla	Passeriformes	12.4677	297	2.47276	0.0387303	16.7	1.22272	-1.47147	Omnivore	0.0862094	-0.498458	-0.200892	Wild
E09PL1	Sylvia_atricapilla	Sylvia_atricapilla	Passeriformes	19.6398	296	2.47129	0.0372655	16.7	1.22272	-1.47147	Omnivore	0.0862094	-0.498458	-0.200892	Wild
E11PL1	Sylvia_atricapilla	Sylvia_atricapilla	Passeriformes	20.6181	351	2.54531	0.111281	16.7	1.22272	-1.47147	Omnivore	0.0862094	-0.498458	-0.200892	Wild
E15PL1	Sylvia_atricapilla	Sylvia_atricapilla	Passeriformes	13.0302	378	2.57749	0.143466	16.7	1.22272	-1.47147	Omnivore	0.0862094	-0.498458	-0.200892	Wild
F02PL1	Sylvia_borin	Sylvia_borin	Passeriformes	15.9085	279	2.4456	0.011578	18.2	1.26007	-1.43411	Omnivore	0.311051	-0.511405	-0.209784	Wild
F08PL1	Sylvia_borin	Sylvia_borin	Passeriformes	13.1628	296	2.47129	0.0372655	18.2	1.26007	-1.43411	Omnivore	0.311051	-0.511405	-0.209784	Wild
F09PL2	Sylvia_borin	Sylvia_borin	Passeriformes	27.0553	388	2.58883	0.154806	18.2	1.26007	-1.43411	Omnivore	0.311051	-0.511405	-0.209784	Wild
F12PL2	Sylvia_borin	Sylvia_borin	Passeriformes		322	2.50786	0.0738297	18.2	1.26007	-1.43411	Omnivore	0.311051	-0.511405	-0.209784	Wild
F15PL1	Sylvia_borin	Sylvia_borin	Passeriformes	19.1408	418	2.62118	0.18715	18.2	1.26007	-1.43411	Omnivore	0.311051	-0.511405	-0.209784	Wild
G05PL2	Sylvia_communis	Sylvia_communis	Passeriformes	19.3289	270	2.43136	-0.00266241	15.1	1.17898	-1.51521	Omnivore	0.0304783	-0.564118	-0.190481	Wild
G09PL2	Sylvia_communis	Sylvia_communis	Passeriformes	15.6664	383	2.5832	0.149173	15.1	1.17898	-1.51521	Omnivore	0.0304783	-0.564118	-0.190481	Wild
G11PL1	Sylvia_communis	Sylvia_communis	Passeriformes	18.4553	371	2.56937	0.135348	15.1	1.17898	-1.51521	Omnivore	0.0304783	-0.564118	-0.190481	Wild
G13PL1	Sylvia_communis	Sylvia_communis	Passeriformes	14.3582	318	2.50243	0.0684009	15.1	1.17898	-1.51521	Omnivore	0.0304783	-0.564118	-0.190481	Wild
G14PL2	Sylvia_communis	Sylvia_communis	Passeriformes	29.0499	301	2.47857	0.0445403	15.1	1.17898	-1.51521	Omnivore	0.0304783	-0.564118	-0.190481	Wild
1	Mycteria_ibis	Mycteria_ibis	Ciconiiformes	20.4392	268	2.42813	-0.00589138	2155.55	3.33356	0.639372	Aquatic predator	-0.15802	-0.342085	-0.116337	Captive
2	Mycteria_ibis	Mycteria_ibis	Ciconiiformes	18.76	272	2.43457	0.000542733	2155.55	3.33356	0.639372	Aquatic predator	-0.15802	-0.342085	-0.116337	Captive
3	Mycteria_ibis	Mycteria_ibis	Ciconiiformes	19.6021	241	2.38202	-0.0520091	2155.55	3.33356	0.639372	Aquatic predator	-0.15802	-0.342085	-0.116337	Captive
4	Mycteria_ibis	Mycteria_ibis	Ciconiiformes	18.5612	283	2.45179	0.0177603	2155.55	3.33356	0.639372	Aquatic predator	-0.15802	-0.342085	-0.116337	Captive
O12160	Tauraco_erythrolophus	Tauraco_erythrolophus	Musophagiformes	23.8817				261.24	2.41704	-0.277146	Frugivore/granivore				Captive
O16001	Tauraco_erythrolophus	Tauraco_erythrolophus	Musophagiformes	19.8742				261.24	2.41704	-0.277146	Frugivore/granivore				Captive
147	Tauraco_erythrolophus	Tauraco_erythrolophus	Musophagiformes	19.7073	227	2.35603	-0.0780003	261.24	2.41704	-0.277146	Frugivore/granivore				Captive
148	Tauraco_erythrolophus	Tauraco_erythrolophus	Musophagiformes	19.3144				261.24	2.41704	-0.277146	Frugivore/granivore				Captive
O06043	Tauraco_fischeri	Tauraco_fischeri	Musophagiformes	23.9207				250	2.39794	-0.296246	Frugivore/granivore	0.125794			Captive
O13085	Tauraco_leucolophus	Tauraco_leucolophus	Musophagiformes	23.6546				219	2.34044	-0.353742	Frugivore/granivore				Captive
O15100	Tauraco_leucolophus	Tauraco_leucolophus	Musophagiformes	25.1496				219	2.34044	-0.353742	Frugivore/granivore				Captive
H02PL2	Turdus_merula	Turdus_merula	Passeriformes	12.4454	233	2.36736	-0.0666702	102.73	2.0117	-0.682488	Omnivore	0.135876	-0.472205	-0.299751	Wild
H03PL1	Turdus_merula	Turdus_merula	Passeriformes	15.6681	424	2.62737	0.19334	102.73	2.0117	-0.682488	Omnivore	0.135876	-0.472205	-0.299751	Wild
H05PL2	Turdus_merula	Turdus_merula	Passeriformes	15.4824	364	2.5611	0.127075	102.73	2.0117	-0.682488	Omnivore	0.135876	-0.472205	-0.299751	Wild
H07PL1	Turdus_merula	Turdus_merula	Passeriformes	16.2059	165	2.21748	-0.216542	102.73	2.0117	-0.682488	Omnivore	0.135876	-0.472205	-0.299751	Wild
H10PL2	Turdus_merula	Turdus_merula	Passeriformes	15.2433	326	2.51322	0.0791914	102.73	2.0117	-0.682488	Omnivore	0.135876	-0.472205	-0.299751	Wild
O12140	Vanellus_miles	Vanellus_miles	Charadriiformes	17.4406				387	2.58771	-0.106475	Carnivore terrestrial	0.108973	-0.223881	0.0321443	Captive
O12142	Vanellus_miles	Vanellus_miles	Charadriiformes	23.7024				387	2.58771	-0.106475	Carnivore terrestrial	0.108973	-0.223881	0.0321443	Captive
47	Gyps_fulvus	Gyps_fulvus	Accipitriformes	25.497	244	2.38739	-0.0466363	7435.99	3.87134	1.17715	Carnivore terrestrial	0.0820115	-0.566066	0.0508996	Captive
48	Gyps_fulvus	Gyps_fulvus	Accipitriformes	23.6211	264	2.4216	-0.0124222	7435.99	3.87134	1.17715	Carnivore terrestrial	0.0820115	-0.566066	0.0508996	Captive
49	Gyps_fulvus	Gyps_fulvus	Accipitriformes	24.8784	365	2.56229	0.128267	7435.99	3.87134	1.17715	Carnivore terrestrial	0.0820115	-0.566066	0.0508996	Captive
72	Gyps_fulvus	Gyps_fulvus	Accipitriformes	29.0895	368	2.56585	0.131822	7435.99	3.87134	1.17715	Carnivore terrestrial	0.0820115	-0.566066	0.0508996	Captive
73	Gyps_fulvus	Gyps_fulvus	Accipitriformes	30.1134	302	2.48001	0.0459808	7435.99	3.87134	1.17715	Carnivore terrestrial	0.0820115	-0.566066	0.0508996	Captive
177	Zenaida_graysoni	Zenaida_graysoni	Columbiformes	14.733				192	2.2833	-0.410884	Frugivore/granivore	-0.0756045		-0.283881	Captive
205 16D	Taeniopygia_guttata	Taeniopygia_guttata	Passeriformes	20.2683	296	2.47129	0.0372655	12	1.07918	-1.615	Frugivore/granivore	0.12422	-0.768528	0.0364318	Captive
044 K18	Taeniopygia_guttata	Taeniopygia_guttata	Passeriformes	18.3624	424	2.62737	0.19334	12	1.07918	-1.615	Frugivore/granivore	0.12422	-0.768528	0.0364318	Captive
059 K18	Taeniopygia_guttata	Taeniopygia_guttata	Passeriformes	21.4542	436	2.63949	0.20546	12	1.07918	-1.615	Frugivore/granivore	0.12422	-0.768528	0.0364318	Captive
127 K18	Taeniopygia_guttata	Taeniopygia_guttata	Passeriformes	22.0959	403	2.60531	0.171279	12	1.07918	-1.615	Frugivore/granivore	0.12422	-0.768528	0.0364318	Captive
119 S18	Taeniopygia_guttata	Taeniopygia_guttata	Passeriformes	17.6866	358	2.55388	0.119857	12	1.07918	-1.615	Frugivore/granivore	0.12422	-0.768528	0.0364318	Captive
154	Taeniopygia_guttata	Taeniopygia_guttata	Passeriformes	22.9867	407	2.60959	0.175568	12	1.07918	-1.615	Frugivore/granivore	0.12422	-0.768528	0.0364318	Captive
165	Taeniopygia_guttata	Taeniopygia_guttata	Passeriformes	20.5688	397	2.59879	0.164764	12	1.07918	-1.615	Frugivore/granivore	0.12422	-0.768528	0.0364318	Captive
259 K19	Taeniopygia_guttata	Taeniopygia_guttata	Passeriformes	17.8484	423	2.62634	0.192314	12	1.07918	-1.615	Frugivore/granivore	0.12422	-0.768528	0.0364318	Captive
27 16D	Taeniopygia_guttata	Taeniopygia_guttata	Passeriformes	17.4715	328	2.51587	0.0818477	12	1.07918	-1.615	Frugivore/granivore	0.12422	-0.768528	0.0364318	Captive
148 S18	Taeniopygia_guttata	Taeniopygia_guttata	Passeriformes	22.6903	400	2.60206	0.168034	12	1.07918	-1.615	Frugivore/granivore	0.12422	-0.768528	0.0364318	Captive
129 K18	Taeniopygia_guttata	Taeniopygia_guttata	Passeriformes	20.3497	367	2.56467	0.13064	12	1.07918	-1.615	Frugivore/granivore	0.12422	-0.768528	0.0364318	Captive
173 K19	Taeniopygia_guttata	Taeniopygia_guttata	Passeriformes	21.7538	324	2.51055	0.0765188	12	1.07918	-1.615	Frugivore/granivore	0.12422	-0.768528	0.0364318	Captive
156	Taeniopygia_guttata	Taeniopygia_guttata	Passeriformes	23.5249	404	2.60638	0.172355	12	1.07918	-1.615	Frugivore/granivore	0.12422	-0.768528	0.0364318	Captive
242 16D	Taeniopygia_guttata	Taeniopygia_guttata	Passeriformes	19.4753	390	2.59106	0.157038	12	1.07918	-1.615	Frugivore/granivore	0.12422	-0.768528	0.0364318	Captive
234 16D	Taeniopygia_guttata	Taeniopygia_guttata	Passeriformes	21.1221	378	2.57749	0.143466	12	1.07918	-1.615	Frugivore/granivore	0.12422	-0.768528	0.0364318	Captive
035 K18	Taeniopygia_guttata	Taeniopygia_guttata	Passeriformes	18.2235	297	2.47276	0.0387303	12	1.07918	-1.615	Frugivore/granivore	0.12422	-0.768528	0.0364318	Captive
135 K19	Taeniopygia_guttata	Taeniopygia_guttata	Passeriformes	21.4837	369	2.56703	0.133	12	1.07918	-1.615	Frugivore/granivore	0.12422	-0.768528	0.0364318	Captive
088 K18	Taeniopygia_guttata	Taeniopygia_guttata	Passeriformes	18.6354	436	2.63949	0.20546	12	1.07918	-1.615	Frugivore/granivore	0.12422	-0.768528	0.0364318	Captive
104 16D	Taeniopygia_guttata	Taeniopygia_guttata	Passeriformes	21.8207	360	2.5563	0.122276	12	1.07918	-1.615	Frugivore/granivore	0.12422	-0.768528	0.0364318	Captive
235 16D	Taeniopygia_guttata	Taeniopygia_guttata	Passeriformes	21.7822	470	2.6721	0.238072	12	1.07918	-1.615	Frugivore/granivore	0.12422	-0.768528	0.0364318	Captive
106 16D	Taeniopygia_guttata	Taeniopygia_guttata	Passeriformes	19.2957	352	2.54654	0.112516	12	1.07918	-1.615	Frugivore/granivore	0.12422	-0.768528	0.0364318	Captive
073 K18	Taeniopygia_guttata	Taeniopygia_guttata	Passeriformes	20.1023	340	2.53148	0.0974527	12	1.07918	-1.615	Frugivore/granivore	0.12422	-0.768528	0.0364318	Captive
127	Taeniopygia_guttata	Taeniopygia_guttata	Passeriformes	20.5235	348	2.54158	0.107553	12	1.07918	-1.615	Frugivore/granivore	0.12422	-0.768528	0.0364318	Captive
139	Taeniopygia_guttata	Taeniopygia_guttata	Passeriformes	18.7494	365	2.56229	0.128267	12	1.07918	-1.615	Frugivore/granivore	0.12422	-0.768528	0.0364318	Captive
151 K18	Taeniopygia_guttata	Taeniopygia_guttata	Passeriformes	23.1801	322	2.50786	0.0738297	12	1.07918	-1.615	Frugivore/granivore	0.12422	-0.768528	0.0364318	Captive
194 16D	Taeniopygia_guttata	Taeniopygia_guttata	Passeriformes	17.0956	388	2.58883	0.154806	12	1.07918	-1.615	Frugivore/granivore	0.12422	-0.768528	0.0364318	Captive
121 K18	Taeniopygia_guttata	Taeniopygia_guttata	Passeriformes	22.1648	380	2.57978	0.145757	12	1.07918	-1.615	Frugivore/granivore	0.12422	-0.768528	0.0364318	Captive
099 K18	Taeniopygia_guttata	Taeniopygia_guttata	Passeriformes	19.8592	308	2.48855	0.0545245	12	1.07918	-1.615	Frugivore/granivore	0.12422	-0.768528	0.0364318	Captive
115 S18	Taeniopygia_guttata	Taeniopygia_guttata	Passeriformes	18.8351	361	2.55751	0.123481	12	1.07918	-1.615	Frugivore/granivore	0.12422	-0.768528	0.0364318	Captive
10 16D	Taeniopygia_guttata	Taeniopygia_guttata	Passeriformes	22.3765	461	2.6637	0.229675	12	1.07918	-1.615	Frugivore/granivore	0.12422	-0.768528	0.0364318	Captive
047 K18	Taeniopygia_guttata	Taeniopygia_guttata	Passeriformes	17.7163	361	2.55751	0.123481	12	1.07918	-1.615	Frugivore/granivore	0.12422	-0.768528	0.0364318	Captive
196 16D	Taeniopygia_guttata	Taeniopygia_guttata	Passeriformes	17.2228	401	2.60314	0.169118	12	1.07918	-1.615	Frugivore/granivore	0.12422	-0.768528	0.0364318	Captive
029 K18	Taeniopygia_guttata	Taeniopygia_guttata	Passeriformes	17.9633	257	2.40993	-0.024093	12	1.07918	-1.615	Frugivore/granivore	0.12422	-0.768528	0.0364318	Captive
4 16D	Taeniopygia_guttata	Taeniopygia_guttata	Passeriformes	18.2649	321	2.50651	0.0724789	12	1.07918	-1.615	Frugivore/granivore	0.12422	-0.768528	0.0364318	Captive
618	Taeniopygia_guttata	Taeniopygia_guttata	Passeriformes	18.4869	374	2.57287	0.138845	12	1.07918	-1.615	Frugivore/granivore	0.12422	-0.768528	0.0364318	Captive
173 16 D	Taeniopygia_guttata	Taeniopygia_guttata	Passeriformes	18.3576	343	2.53529	0.101268	12	1.07918	-1.615	Frugivore/granivore	0.12422	-0.768528	0.0364318	Captive
132 S18	Taeniopygia_guttata	Taeniopygia_guttata	Passeriformes	22.8002	316	2.49969	0.0656609	12	1.07918	-1.615	Frugivore/granivore	0.12422	-0.768528	0.0364318	Captive
11 16D	Taeniopygia_guttata	Taeniopygia_guttata	Passeriformes	18.5015	349	2.54283	0.108799	12	1.07918	-1.615	Frugivore/granivore	0.12422	-0.768528	0.0364318	Captive
119 K19	Taeniopygia_guttata	Taeniopygia_guttata	Passeriformes		320	2.50515	0.0711238	12	1.07918	-1.615	Frugivore/granivore	0.12422	-0.768528	0.0364318	Captive
35	Taeniopygia_guttata	Taeniopygia_guttata	Passeriformes	18.8735	466	2.66839	0.23436	12	1.07918	-1.615	Frugivore/granivore	0.12422	-0.768528	0.0364318	Captive
89 17 S	Taeniopygia_guttata	Taeniopygia_guttata	Passeriformes	20.3156	387	2.58771	0.153685	12	1.07918	-1.615	Frugivore/granivore	0.12422	-0.768528	0.0364318	Captive
19	Taeniopygia_guttata	Taeniopygia_guttata	Passeriformes	23.7195	330	2.51851	0.0844878	12	1.07918	-1.615	Frugivore/granivore	0.12422	-0.768528	0.0364318	Captive
37 16D	Taeniopygia_guttata	Taeniopygia_guttata	Passeriformes	17.7545	340	2.53148	0.0974527	12	1.07918	-1.615	Frugivore/granivore	0.12422	-0.768528	0.0364318	Captive
1008	Taeniopygia_guttata	Taeniopygia_guttata	Passeriformes	19.0777	418	2.62118	0.18715	12	1.07918	-1.615	Frugivore/granivore	0.12422	-0.768528	0.0364318	Captive
089 K18	Taeniopygia_guttata	Taeniopygia_guttata	Passeriformes	20.6669	330	2.51851	0.0844878	12	1.07918	-1.615	Frugivore/granivore	0.12422	-0.768528	0.0364318	Captive
70 16D	Taeniopygia_guttata	Taeniopygia_guttata	Passeriformes	25.9319	396	2.5977	0.163669	12	1.07918	-1.615	Frugivore/granivore	0.12422	-0.768528	0.0364318	Captive
137 K18	Taeniopygia_guttata	Taeniopygia_guttata	Passeriformes	20.2817	345	2.53782	0.103793	12	1.07918	-1.615	Frugivore/granivore	0.12422	-0.768528	0.0364318	Captive
022 K18	Taeniopygia_guttata	Taeniopygia_guttata	Passeriformes	16.7818	300	2.47712	0.0430951	12	1.07918	-1.615	Frugivore/granivore	0.12422	-0.768528	0.0364318	Captive
107 S18	Taeniopygia_guttata	Taeniopygia_guttata	Passeriformes	23.0915	369	2.56703	0.133	12	1.07918	-1.615	Frugivore/granivore	0.12422	-0.768528	0.0364318	Captive
010 K18	Taeniopygia_guttata	Taeniopygia_guttata	Passeriformes	15.544	346	2.53908	0.10505	12	1.07918	-1.615	Frugivore/granivore	0.12422	-0.768528	0.0364318	Captive
053 K18	Taeniopygia_guttata	Taeniopygia_guttata	Passeriformes	24.4094	374	2.57287	0.138845	12	1.07918	-1.615	Frugivore/granivore	0.12422	-0.768528	0.0364318	Captive
220 16 D	Taeniopygia_guttata	Taeniopygia_guttata	Passeriformes	19.5062	333	2.52244	0.0884181	12	1.07918	-1.615	Frugivore/granivore	0.12422	-0.768528	0.0364318	Captive
049 K18	Taeniopygia_guttata	Taeniopygia_guttata	Passeriformes	25.5877	345	2.53782	0.103793	12	1.07918	-1.615	Frugivore/granivore	0.12422	-0.768528	0.0364318	Captive
109 S18	Taeniopygia_guttata	Taeniopygia_guttata	Passeriformes	22.6278	423	2.62634	0.192314	12	1.07918	-1.615	Frugivore/granivore	0.12422	-0.768528	0.0364318	Captive
78 16D	Taeniopygia_guttata	Taeniopygia_guttata	Passeriformes		393	2.59439	0.160366	12	1.07918	-1.615	Frugivore/granivore	0.12422	-0.768528	0.0364318	Captive
102	Taeniopygia_guttata	Taeniopygia_guttata	Passeriformes	16.9614	359	2.55509	0.121068	12	1.07918	-1.615	Frugivore/granivore	0.12422	-0.768528	0.0364318	Captive
147	Taeniopygia_guttata	Taeniopygia_guttata	Passeriformes		312	2.49415	0.0601284	12	1.07918	-1.615	Frugivore/granivore	0.12422	-0.768528	0.0364318	Captive
840	Taeniopygia_guttata	Taeniopygia_guttata	Passeriformes		356	2.55145	0.117424	12	1.07918	-1.615	Frugivore/granivore	0.12422	-0.768528	0.0364318	Captive
S520F/008	Taeniopygia_guttata	Taeniopygia_guttata	Passeriformes		309	2.48996	0.0559323	12	1.07918	-1.615	Frugivore/granivore	0.12422	-0.768528	0.0364318	Captive
1052	Taeniopygia_guttata	Taeniopygia_guttata	Passeriformes	21.3134	398	2.59988	0.165857	12	1.07918	-1.615	Frugivore/granivore	0.12422	-0.768528	0.0364318	Captive

## Sheet: Age+Sex
ID	animal	Glycation	Glucose	logGlucose	Centered_logGlucose	Body_mass	logBM	Centered_logBM	Age	Sex	Age_relative
10	Acryllium_vulturinum	19.4297	194	2.2878	-0.150889	1330	3.12385	0.536991	0.150685	F	0.00793079
11	Aegypius_monachus	20.9114	266	2.42488	-0.0138092	9320.55	3.96944	1.38258	24	M	0.55814
12	Aegypius_monachus	19.7956	251	2.39967	-0.0390171	9320.55	3.96944	1.38258	36.4164	M	0.846894
13	Aegypius_monachus	20.9567	320	2.50515	0.0664591	9320.55	3.96944	1.38258	32.4795	F	0.755336
63445	Tachymarptis_melba	14.6327	343	2.53529	0.0966033	100.38	2.00165	-0.585213		F
68786	Tachymarptis_melba	14.3689	375	2.57403	0.13534	100.38	2.00165	-0.585213		F
65845	Tachymarptis_melba	12.4638	382	2.58206	0.143373	100.38	2.00165	-0.585213		F
56219	Tachymarptis_melba	25.0175	296.5	2.47202	0.0333339	100.38	2.00165	-0.585213	11	F	0.423077
56230	Tachymarptis_melba	27.6069	344.5	2.53719	0.0984984	100.38	2.00165	-0.585213	11	F	0.423077
56284	Tachymarptis_melba	27.5304	336	2.52634	0.0876484	100.38	2.00165	-0.585213	9	F	0.346154
56327	Tachymarptis_melba	28.1363	338	2.52892	0.0902259	100.38	2.00165	-0.585213	7	F	0.269231
63120	Tachymarptis_melba	28.2301	329.5	2.51786	0.0791646	100.38	2.00165	-0.585213	7	F	0.269231
63279	Tachymarptis_melba	27.9251	368	2.56585	0.127157	100.38	2.00165	-0.585213	7	F	0.269231
63361	Tachymarptis_melba	28.6356	379	2.57864	0.139948	100.38	2.00165	-0.585213	4	F	0.153846
63375	Tachymarptis_melba	28.4081	414.5	2.61752	0.178834	100.38	2.00165	-0.585213	4	F	0.153846
63448	Tachymarptis_melba	13.9332	320.5	2.50583	0.0671372	100.38	2.00165	-0.585213	4	F	0.153846
68317	Tachymarptis_melba	26.7927	347	2.54033	0.101639	100.38	2.00165	-0.585213	4	F	0.153846
68705	Tachymarptis_melba	28.3676	337	2.52763	0.0889391	100.38	2.00165	-0.585213	4	F	0.153846
68813	Tachymarptis_melba	27.7111	314	2.49693	0.0582388	100.38	2.00165	-0.585213	2	F	0.0769231
68813	Tachymarptis_melba	27.9551	333	2.52244	0.0837534	100.38	2.00165	-0.585213	10	F	0.384615
68846	Tachymarptis_melba	27.532	287.5	2.45864	0.019947	100.38	2.00165	-0.585213	5	F	0.192308
68857	Tachymarptis_melba	26.1142	341.5	2.53339	0.0946999	100.38	2.00165	-0.585213	3	F	0.115385
68864	Tachymarptis_melba	28.7319	328.5	2.51654	0.0778445	100.38	2.00165	-0.585213	3	F	0.115385
70435	Tachymarptis_melba	27.3591	319.5	2.50447	0.06578	100.38	2.00165	-0.585213	3	F	0.115385
72620	Tachymarptis_melba	28.3907	349	2.54283	0.104135	100.38	2.00165	-0.585213	14	F	0.538462
72638	Tachymarptis_melba	26.6126	373.5	2.57229	0.1336	100.38	2.00165	-0.585213	14	F	0.538462
66307	Tachymarptis_melba	28.188	381.5	2.58149	0.142804	100.38	2.00165	-0.585213	14	F	0.538462
71849	Tachymarptis_melba	26.8139	314.5	2.49762	0.0589298	100.38	2.00165	-0.585213	13	F	0.5
72166	Tachymarptis_melba	25.4593	357.5	2.55328	0.114585	100.38	2.00165	-0.585213	9	F	0.346154
72200	Tachymarptis_melba	26.3165	337.5	2.52827	0.0895829	100.38	2.00165	-0.585213	8	F	0.307692
73324	Tachymarptis_melba	26.1803	399	2.60097	0.162282	100.38	2.00165	-0.585213	7	F	0.269231
61128	Tachymarptis_melba	24.8603	352.5	2.54716	0.108468	100.38	2.00165	-0.585213	7	F	0.269231
61156	Tachymarptis_melba	26.7621	363	2.55991	0.121216	100.38	2.00165	-0.585213	7	F	0.269231
61271	Tachymarptis_melba	23.8547	358	2.55388	0.115192	100.38	2.00165	-0.585213	7	F	0.269231
63559	Tachymarptis_melba	24.4205	359	2.55509	0.116404	100.38	2.00165	-0.585213	6	F	0.230769
63592	Tachymarptis_melba	26.6007	381.5	2.58149	0.142804	100.38	2.00165	-0.585213	5	F	0.192308
68305	Tachymarptis_melba	26.3382	370.5	2.56879	0.130097	100.38	2.00165	-0.585213	5	F	0.192308
68586	Tachymarptis_melba	26.375	353.5	2.54839	0.109699	100.38	2.00165	-0.585213	5	F	0.192308
68587	Tachymarptis_melba	26.3314	392	2.59329	0.154595	100.38	2.00165	-0.585213	5	F	0.192308
68599	Tachymarptis_melba	25.4877	346.5	2.5397	0.101012	100.38	2.00165	-0.585213	5	F	0.192308
68646	Tachymarptis_melba	26.214	359	2.55509	0.116404	100.38	2.00165	-0.585213	4	F	0.153846
68655	Tachymarptis_melba	24.6404	370	2.5682	0.129511	100.38	2.00165	-0.585213	3	F	0.115385
70522	Tachymarptis_melba	13.2558	315	2.49831	0.0596197	100.38	2.00165	-0.585213	3	F	0.115385
184	Anas_bernieri	11.7112	320	2.50515	0.0664591	378.48	2.57804	-0.00881764	10.2822	F	0.447052
186	Anas_bernieri	11.0427	192	2.2833	-0.15539	378.48	2.57804	-0.00881764	0.128767	M	0.00559857
2	Anas_platyrhynchos	13.042	204	2.30963	-0.129061	843.42	2.92604	0.339183	5.82192	F	0.200066
3	Anas_platyrhynchos	12.8709	199	2.29885	-0.139838	843.42	2.92604	0.339183	2.81918	F	0.096879
4	Anas_platyrhynchos	10.3455	201	2.3032	-0.135495	843.42	2.92604	0.339183	1.21918	M	0.0418962
5	Anas_platyrhynchos	12.9934	204	2.30963	-0.129061	843.42	2.92604	0.339183	1.21644	M	0.041802
6	Anas_platyrhynchos	12.4823	221	2.34439	-0.0942986	843.42	2.92604	0.339183	1.21644	M	0.041802
O18126	Anodorhynchus_hyacinthinus	12.0165	250	2.39794	-0.0407508	1331	3.12418	0.537317	0.353425	M	0.00821918
Doudou	Anodorhynchus_hyacinthinus	16.1778	284	2.45332	0.0146275	1331	3.12418	0.537317	36.9096	M	0.858363
Oie1	Anser_anser	16.5495	178	2.25042	-0.188271	3302.41	3.51883	0.93197	2	M	0.0645161
Oie2	Anser_anser	15.8169	204	2.30963	-0.129061	3302.41	3.51883	0.93197	2	M	0.0645161
Oie3	Anser_anser	16.8581	141	2.14922	-0.289472	3302.41	3.51883	0.93197	1	M	0.0322581
O18081	Chen_canagica	12.9235	171	2.233	-0.205695	2136.49	3.3297	0.74284	0.460274	M	0.0354057
O11006	Chen_canagica	12.7051	207	2.31597	-0.12272	2136.49	3.3297	0.74284	8.47534	M	0.651949
O11007	Chen_canagica	12.1589	170	2.23045	-0.208242	2136.49	3.3297	0.74284	8.47534	F	0.651949
60	Anser_indicus	16.1849	167	2.22272	-0.215974	2212.55	3.34489	0.758033	2.50685	M
61	Anser_indicus	17.7947	241	2.38202	-0.0566738	2212.55	3.34489	0.758033	1.53425	M
62	Anser_indicus	19.44	180	2.25527	-0.183418	2212.55	3.34489	0.758033	5.49863	M
63	Anser_indicus	17.2149	257	2.40993	-0.0287577	2212.55	3.34489	0.758033	2.53973	F
64	Anser_indicus	15.6587	216	2.33445	-0.104237	2212.55	3.34489	0.758033	10.5288	F
18054	Anser_indicus	14.7458	202	2.30535	-0.133339	2212.55	3.34489	0.758033	0.482192	F
18067	Anser_indicus	15.007	207	2.31597	-0.12272	2212.55	3.34489	0.758033	0.479452	M
O10030	Grus_paradisea	27.2042	231	2.36361	-0.0750789	4540.62	3.65712	1.07025	21.4466	M	0.857863
O970291	Grus_paradisea	22.8352	209	2.32015	-0.118545	4540.62	3.65712	1.07025	23.4219	F	0.936877
13	Grus_virgo	21.867	140	2.14613	-0.292563	2417	3.38328	0.796416	32.4795	F	0.484768
14	Grus_virgo	28.7761	277	2.44248	0.00378892	2417	3.38328	0.796416	0.29589	F	0.00441627
14	Grus_virgo	25.2242	295	2.46982	0.0311312	2417	3.38328	0.796416	0.29589	F	0.00441627
100	Ara_ambiguus	13.0134	261	2.41664	-0.0220503	1300	3.11394	0.527083	19.2274	F	0.480685
101	Ara_ambiguus	15.3664	273	2.43616	-0.0025282	1300	3.11394	0.527083	23	M	0.575
O03115	Ara_ambiguus	14.6212	278	2.44404	0.00535395	1300	3.11394	0.527083	16.2932	F	0.407329
O018038	Ara_ambiguus	13.236	253	2.40312	-0.0355703	1300	3.11394	0.527083	0.523288	F	0.0130822
O018042	Ara_ambiguus	14.3979	295	2.46982	0.0311312	1300	3.11394	0.527083	0.517808	F	0.0129452
O0980025	Ara_ambiguus	14.4415	252	2.4014	-0.0372903	1300	3.11394	0.527083		M
90	Ara_glaucogularis	16.4514	231	2.36361	-0.0750789	783.99	2.89431	0.30745	0.336986	F	0.0102117
91	Ara_glaucogularis	18.8744	259	2.4133	-0.0253911	783.99	2.89431	0.30745	0.350685	F	0.0106268
92	Ara_glaucogularis	16.353	226	2.35411	-0.0845824	783.99	2.89431	0.30745	0.361644	M	0.0109589
93	Ara_glaucogularis	15.7829	289	2.4609	0.022207	783.99	2.89431	0.30745	20.4247	F	0.618929
94	Ara_glaucogularis	23.386	298	2.47422	0.0355254	783.99	2.89431	0.30745	20.3753	M	0.617435
O09225	Ara_glaucogularis	19.9492	238	2.37658	-0.0621139	783.99	2.89431	0.30745	17.4411	M	0.528518
O09226	Ara_glaucogularis	14.6839	200	2.30103	-0.137661	783.99	2.89431	0.30745	17.4904	F	0.530012
34	Ara_militaris	16.5232	234	2.36922	-0.069475	1134	3.05461	0.467752	2.29315	F	0.0498511
84	Ara_militaris	14.345	291	2.46389	0.0252021	1134	3.05461	0.467752	0.389041	F	0.00845742
85	Ara_militaris	13.0231	277	2.44248	0.00378892	1134	3.05461	0.467752	0.438356	M	0.00952948
86	Ara_militaris	14.1825	280	2.44716	0.00846719	1134	3.05461	0.467752	0.413699	F	0.00899345
95	Aratinga_auricapillus	12.8577	221	2.34439	-0.0942986	130	2.11394	-0.472917	9.38356	M	0.448974
96	Aratinga_auricapillus	13.3367	224	2.35025	-0.0884428	130	2.11394	-0.472917	11.3041	M	0.540866
O09162	Aratinga_auricapillus	10.8034	227	2.35603	-0.082665	130	2.11394	-0.472917	9.37808	M	0.448712
O11123	Aratinga_auricapillus	11.261	229	2.35984	-0.0788554	130	2.11394	-0.472917	7.42466	M	0.355247
O12066	Aratinga_auricapillus	11.961	212	2.32634	-0.112355	130	2.11394	-0.472917	6.45205	M	0.308711
161	Aythya_baeri	11.6334	244	2.38739	-0.051301	681.23	2.83329	0.246433	6.30685	F	0.420457
162	Aythya_baeri	10.1539	185	2.26717	-0.171519	681.23	2.83329	0.246433	1.24384	M	0.0829224
174	Aythya_baeri	11.0085	176	2.24551	-0.193178	681.23	2.83329	0.246433	6.37808	F	0.425205
O08132	Balearica_pavonina	21.4122	193	2.28556	-0.153134	3590	3.55509	0.968234	10.1781	M	0.592126
O06005	Balearica_pavonina	13.9545	164	2.21484	-0.223847	3590	3.55509	0.968234	14.2548	F	0.829296
O150112940	Branta_hutchinsii	12.3434	182	2.26007	-0.178619	2811.68	3.44897	0.862105	15.5671	F	0.370646
O0181	Branta_leucopsis	14.1265	212	2.32634	-0.112355	1683.97	3.22633	0.639474	18.4712	F	0.655783
O0182	Branta_leucopsis	14.7633	240	2.38021	-0.0584796	1683.97	3.22633	0.639474	18.4712	M	0.655783
O0184	Branta_leucopsis	15.6326	172	2.23553	-0.203162	1683.97	3.22633	0.639474	18.4712	M	0.655783
61	Branta_ruficollis	14.1228	227	2.35603	-0.082665	1226.47	3.08866	0.501796	2.33151	M	0.111024
62	Branta_ruficollis	12.7213	236	2.37291	-0.0657788	1226.47	3.08866	0.501796		F
63	Branta_ruficollis	12.7771	352	2.54654	0.107852	1226.47	3.08866	0.501796		F
79	Bubo_scandiaca	24.1582	252	2.4014	-0.0372903	2028.76	3.30723	0.72037	6.36438	F	0.227299
80	Bubo_scandiaca	27.8382	361	2.55751	0.118816	2028.76	3.30723	0.72037	16.3671	M	0.58454
81	Bubo_scandiaca	24.7633	294	2.46835	0.0296565	2028.76	3.30723	0.72037	0.375342	M	0.0134051
42	Bucorvus_abyssinicus	20.366	385	2.58546	0.14677	4000	3.60206	1.0152	11.411	M	0.163014
43	Bucorvus_abyssinicus	12.7074	304	2.48287	0.0441827	4000	3.60206	1.0152	1.31507	F	0.0187867
44	Bucorvus_abyssinicus	17.9598	353	2.54777	0.109084	4000	3.60206	1.0152	3.27945	M	0.0468493
54	Bucorvus_abyssinicus	16.7785	316	2.49969	0.0609962	4000	3.60206	1.0152	11.411	M	0.163014
41	Bucorvus_cafer	0	332	2.52114	0.0824472	3743.62	3.57329	0.986431	25.3384	M	0.361977
53	Bucorvus_cafer	0	305	2.4843	0.045609	3743.62	3.57329	0.986431	10.411	F	0.148728
7	Bucorvus_cafer	23.4199	213	2.32838	-0.110311	3743.62	3.57329	0.986431	22.4192	M	0.320274
8P	Bucorvus_cafer	22.5299	254	2.40483	-0.0338571	3743.62	3.57329	0.986431
143	Burhinus_grallarius	19.7253	238	2.37658	-0.0621139	648.07	2.81162	0.224761	5.25205	F	0.175068
122	Caloenas_nicobarica	21.8421	221	2.34439	-0.0942986	537.86	2.73067	0.143809	2.59726	M	0.068349
127	Caloenas_nicobarica	18.5928	211	2.32428	-0.114408	537.86	2.73067	0.143809	0.939726	M	0.0247296
129	Caloenas_nicobarica	19.2738	303	2.48144	0.0427518	537.86	2.73067	0.143809	6.28219	F	0.165321
6096761	Calonectris_diomedea	35.8195	289	2.4609	0.022207	534.99	2.72835	0.141485		F
6114890	Calonectris_diomedea	38.6466	276	2.44091	0.00221824	534.99	2.72835	0.141485		M
6114984	Calonectris_diomedea	35.0119	300	2.47712	0.0384304	534.99	2.72835	0.141485		M
6134827	Calonectris_diomedea	37.4513	267	2.42651	-0.0121796	534.99	2.72835	0.141485		M
6187001	Calonectris_diomedea	26.4119	214	2.33041	-0.108277	534.99	2.72835	0.141485		F
45	Cariama_cristata	24.1429	384	2.58433	0.14564	1400	3.14613	0.559267	11.5288	M
46	Cariama_cristata	17.6305	335	2.52504	0.086354	1400	3.14613	0.559267	14.4877	F
50	Cariama_cristata	24.2632	326	2.51322	0.0745268	1400	3.14613	0.559267	4.42466	F
51	Cariama_cristata	19.2962	356	2.55145	0.112759	1400	3.14613	0.559267	4.42466	F
52	Cariama_cristata	22.4462	274	2.43775	-0.000940283	1400	3.14613	0.559267	6.59452	M
5	Ciconia_abdimii	24.894	193	2.28556	-0.153134	1398	3.14551	0.558647	3.47945	F	0.161086
6	Ciconia_abdimii	20.8173	248	2.39445	-0.0442392	1398	3.14551	0.558647	3.47945	M	0.161086
7	Ciconia_abdimii	22.1888	275	2.43933	0.000641848	1398	3.14551	0.558647	3.47945	F	0.161086
8	Ciconia_abdimii	22.6031	259	2.4133	-0.0253911	1398	3.14551	0.558647	1.38356		0.0640538
O09221	Ciconia_nigra	21.2619	205	2.31175	-0.126937	2926	3.46627	0.879414	9.45205	F	0.301983
O07048	Ciconia_nigra	23.2376	263	2.41996	-0.0187351	2926	3.46627	0.879414	11.5041	F	0.367543
65	Cygnus_atratus	15.8728	182	2.26007	-0.178619	5623.16	3.74998	1.16312	1.87397	F	0.0468493
68	Cygnus_atratus	15.3231	131	2.11727	-0.32142	5623.16	3.74998	1.16312	7.14247	M	0.178562
82	Cygnus_atratus	15.8544	214	2.33041	-0.108277	5623.16	3.74998	1.16312	11.8082	F	0.295205
83	Cygnus_atratus	15.042	147	2.16732	-0.271374	5623.16	3.74998	1.16312	9.29863	M	0.232466
56	Dacelo_novaeguineae	25.5351	304	2.48287	0.0441827	333.8	2.52349	-0.0633742	3.60548	F	0.134533
59	Dacelo_novaeguineae	22.2573	369	2.56703	0.128336	333.8	2.52349	-0.0633742	9.52329	F	0.355347
134	Dendrocygna_bicolor	12.3394	183	2.26245	-0.17624	756.37	2.87873	0.291874	8.36164	M	0.398174
O14092	Dendrocygna_viduata	12.762	291	2.46389	0.0252021	689.99	2.83884	0.251982	6.40548	M	0.23724
130	Dendrocygna_viduata	12.0823	261	2.41664	-0.0220503	689.99	2.83884	0.251982	9.33973	M	0.345916
131	Dendrocygna_viduata	10.4162	239	2.3784	-0.0602929	689.99	2.83884	0.251982	2.20274	M	0.081583
132	Dendrocygna_viduata	11.0534	231	2.36361	-0.0750789	689.99	2.83884	0.251982	2.20274	F	0.081583
133	Dendrocygna_viduata	12.7222	163	2.21219	-0.226503	689.99	2.83884	0.251982	2.20274	M	0.081583
109	Eudocimus_ruber	16.9742	250	2.39794	-0.0407508	660.08	2.8196	0.232736	9.30685	F	0.216438
110	Eudocimus_ruber	14.4396	231	2.36361	-0.0750789	660.08	2.8196	0.232736	3.16164	M	0.0735266
111	Eudocimus_ruber	20.774	295	2.46982	0.0311312	660.08	2.8196	0.232736	2.25479	M	0.0524371
113	Eudocimus_ruber	13.4154	233	2.36736	-0.0713349	660.08	2.8196	0.232736	2.34521	F	0.0545397
114	Eudocimus_ruber	15.8294	212	2.32634	-0.112355	660.08	2.8196	0.232736	2.27945	F	0.0530105
115	Eudocimus_ruber	15.5118	246	2.39094	-0.0477557	660.08	2.8196	0.232736	12.4685	M	0.289965
005	Limosa_limosa	21.5493	297	2.47276	0.0340656	288.37	2.45995	-0.12691		F
010	Limosa_limosa	18.6716	282	2.45025	0.0115583	288.37	2.45995	-0.12691		M
015	Limosa_limosa	21.5838	303	2.48144	0.0427518	288.37	2.45995	-0.12691		M
020	Limosa_limosa	19.7059	228	2.35793	-0.080756	288.37	2.45995	-0.12691		M
286	Limosa_limosa	23.2651	370	2.5682	0.129511	288.37	2.45995	-0.12691		M
35	Balearica_regulorum	21.4489	271	2.43297	-0.00572155	3771.99	3.57657	0.98971	5.37534	F	0.197623
36	Balearica_regulorum	20.2632	278	2.44404	0.00535395	3771.99	3.57657	0.98971	5.37534	M	0.197623
37	Balearica_regulorum	21.8876	237	2.37475	-0.0639425	3771.99	3.57657	0.98971	5.27945	F	0.194098
38	Balearica_regulorum	22.9	221	2.34439	-0.0942986	3771.99	3.57657	0.98971	5.27945	M	0.194098
55	Balearica_regulorum	24.4545	217	2.33646	-0.102231	3771.99	3.57657	0.98971	5.49863	F	0.202156
74	Geronticus_eremita	19.3889	252	2.4014	-0.0372903	1202	3.0799	0.493044	1.36986	M	0.0370233
75	Geronticus_eremita	19.8701	259	2.4133	-0.0253911	1202	3.0799	0.493044	1.36986	M	0.0370233
76	Geronticus_eremita	24.3358	283	2.45179	0.0130956	1202	3.0799	0.493044	13.6329	M	0.368456
77	Geronticus_eremita	20.7776	214	2.33041	-0.108277	1202	3.0799	0.493044	5.69863	F	0.154017
16	Leptoptilos_crumeniferus	18.1699	269	2.42975	-0.00893857	6067.87	3.78304	1.19618	4.59726	F	0.102847
17	Leptoptilos_crumeniferus	17.7428	273	2.43616	-0.0025282	6067.87	3.78304	1.19618	28.3589	M	0.634427
18	Leptoptilos_crumeniferus	17.3702	255	2.40654	-0.0321507	6067.87	3.78304	1.19618	16	F	0.357942
39	Leptoptilos_crumeniferus	16.5316	253	2.40312	-0.0355703	6067.87	3.78304	1.19618	3.49863	M	0.0782691
40	Leptoptilos_crumeniferus	17.3593	273	2.43616	-0.0025282	6067.87	3.78304	1.19618	11.4247	M	0.255585
136	Leucopsar_rothschildi	19.8577	488	2.68842	0.249729	91.3	1.96047	-0.62639	9.12603	M	0.304201
C12054	Lophophorus_impejanus	19.5984	198	2.29667	-0.142026	2066.51	3.31524	0.728377	6.50411	M
O12138	Lophophorus_impejanus	18.6607	224	2.35025	-0.0884428	2066.51	3.31524	0.728377	6.50411	F
178	Lophotibis_cristata	15.1765	219	2.34044	-0.0982467	583	2.76567	0.178808	6.28219	M	0.261758
139	Lophura_edwardsi	17.0529	280	2.44716	0.00846719	1090.96	3.03781	0.450948	13.4192	F	0.516122
151	Neophron_percnopterus	18.2804	229	2.35984	-0.0788554	2082	3.31848	0.73162	7.38356	M	0.171711
152	Neophron_percnopterus	26.4125	259	2.4133	-0.0253911	2082	3.31848	0.73162	7.40274	F	0.172157
146	Nesoenas_mayeri	21.6931	505	2.70329	0.264601	302.76	2.4811	-0.105762	4.46301	F	0.247945
102	Numida_meleagris	17.6703	279	2.4456	0.00691336	1299	3.11361	0.526749	1.27397		0.0410959
103	Numida_meleagris	16.513	338	2.52892	0.0902259	1299	3.11361	0.526749	1.27397		0.0410959
105	Numida_meleagris	18.9115	376	2.57519	0.136497	1299	3.11361	0.526749	1.27397		0.0410959
106	Numida_meleagris	15.8618	440	2.64345	0.204762	1299	3.11361	0.526749	1.27397		0.0410959
29	Ortalis_canicollis	17.7451	336	2.52634	0.0876484	539	2.73159	0.144728	0.410959	F
30	Ortalis_canicollis	19.2874	355	2.55023	0.111538	539	2.73159	0.144728	1.30137	F
31	Ortalis_canicollis	16.809	296	2.47129	0.0326009	539	2.73159	0.144728	7.56712	M
870138	Pelecanus_crispus	21.7874	234	2.36922	-0.069475	9512.09	3.97828	1.39142	31.9068	M	0.886301
66	Pelecanus_crispus	20.7062	172	2.23553	-0.203162	9512.09	3.97828	1.39142	7.45205	F	0.207002
19	Pelecanus_onocrotalus	16.604	264	2.4216	-0.0170869	9322.31	3.96952	1.38266	19.3425	F	0.379264
20	Pelecanus_onocrotalus	18.4652	251	2.39967	-0.0390171	9322.31	3.96952	1.38266	7.64658	F	0.149933
21	Pelecanus_onocrotalus	19.7351	298	2.47422	0.0355254	9322.31	3.96952	1.38266	21.926	F	0.429922
22	Pelecanus_onocrotalus	17.7842	260	2.41497	-0.0237175	9322.31	3.96952	1.38266	21.9205	M	0.429815
23	Pelecanus_onocrotalus	19.7732	359	2.55509	0.116404	9322.31	3.96952	1.38266	4.55342	M	0.0892828
14	Phoenicopterus_ruber	10.1821	105	2.02119	-0.417502	3031.59	3.48167	0.89481	0.29589	F	0.00448319
15	Phoenicopterus_ruber	9.95036	123	2.08991	-0.348786	3031.59	3.48167	0.89481	0.271233	F	0.00410959
16	Phoenicopterus_ruber	10.644	117	2.06819	-0.370505	3031.59	3.48167	0.89481	0.29863	M	0.0045247
22	Phoenicopterus_ruber	8.57481	196	2.29226	-0.146435	3031.59	3.48167	0.89481	48.8507	M	0.740162
25	Phoenicopterus_ruber	10.443	190	2.27875	-0.159937	3031.59	3.48167	0.89481	1.33151	M	0.0201743
32	Psophia_crepitans	21.6693	231	2.36361	-0.0750789	1026	3.01115	0.424287	14.6575	M
33	Psophia_crepitans	24.0349	289	2.4609	0.022207	1026	3.01115	0.424287	17.4575	F
87	Psophia_crepitans	20.922	252	2.4014	-0.0372903	1026	3.01115	0.424287	14.8575	M
O12159	Platalea_ajaja	14.3727	187	2.27184	-0.166849	1490	3.17319	0.586326	6.50685	F	0.224374
O13073	Platalea_ajaja	13.961	191	2.28103	-0.157657	1490	3.17319	0.586326	5.31781	M	0.183373
14108	Rhea_pennata	25.0701	175	2.24304	-0.195653	23000	4.36173	1.77487	4.5589	M	0.303927
15104	Rhea_pennata	33.0726	183	2.26245	-0.17624	23000	4.36173	1.77487	3.45753	M	0.230502
18076	Rhea_pennata	23.9088	216	2.33445	-0.104237	23000	4.36173	1.77487	0.484932	F	0.0323288
82	Rhea_pennata	21.8071	148	2.17026	-0.268429	23900	4.3784	1.79154	6.39178	M	0.426119
87	Rhea_pennata	22.5686	167	2.22272	-0.215974	23900	4.3784	1.79154	0.484932	F	0.0323288
88	Rhea_pennata	20.4916	154	2.18752	-0.25117	23900	4.3784	1.79154	0.438356	F	0.0292237
89	Rhea_pennata	21.2258	181	2.25768	-0.181012	23900	4.3784	1.79154	0.460274	M	0.0306849
83	Rhea_pennata	25.2616	186	2.26951	-0.169178	23900	4.3784	1.79154	12.4137	F	0.82758
85	Rhea_pennata	23.7996	147	2.16732	-0.271374	23900	4.3784	1.79154	0.438356	M	0.0292237
64	Sarkidiornis_melanotos	13.5656	258	2.41162	-0.0270711	2610	3.41664	0.82978	4.2411	F	0.19726
65	Sarkidiornis_melanotos	12.2474	174	2.24055	-0.198142	2610	3.41664	0.82978	4.2411	F	0.19726
70	Sarkidiornis_melanotos	13.4268	205	2.31175	-0.126937	2610	3.41664	0.82978	1.23014	M	0.0572157
71	Sarkidiornis_melanotos	13.6462	191	2.28103	-0.157657	2610	3.41664	0.82978	1.23014	F	0.0572157
72	Sarkidiornis_melanotos	13.076	207	2.31597	-0.12272	2610	3.41664	0.82978	1.23014	F	0.0572157
163	Sarkidiornis_melanotos	18.9836	179	2.25285	-0.185838	2610	3.41664	0.82978	4.24384	M	0.197388
PDN 2022 20	Pagodroma_nivea	15.1364	210	2.32222	-0.116472	268	2.42813	-0.158726	40	M	0.833333
PDN 2022 22	Pagodroma_nivea	11.6484	265	2.42325	-0.015445	268	2.42813	-0.158726	27		0.5625
PDN 2022 23	Pagodroma_nivea	13.0225	241	2.38202	-0.0566738	268	2.42813	-0.158726	14		0.291667
PDN 2022 24	Pagodroma_nivea	10.644	243	2.38561	-0.0530846	268	2.42813	-0.158726	26		0.541667
PDN 2022 25	Pagodroma_nivea	10.4863	204	2.30963	-0.129061	268	2.42813	-0.158726	30		0.625
PDN 2022 26	Pagodroma_nivea	17.6326	246	2.39094	-0.0477557	268	2.42813	-0.158726	47		0.979167
PDN 2022 27	Pagodroma_nivea	16.4479	245	2.38917	-0.0495248	268	2.42813	-0.158726	15		0.3125
PDN 2022 28	Pagodroma_nivea	12.5871	221	2.34439	-0.0942986	268	2.42813	-0.158726	48		1
PDN 2022 29	Pagodroma_nivea	13.3515	218	2.33846	-0.100234	268	2.42813	-0.158726	31		0.645833
E02PL2	Sylvia_atricapilla	12.2085	296	2.47129	0.0326009	16.7	1.22272	-1.36414		F
E07PL1	Sylvia_atricapilla	12.4677	297	2.47276	0.0340656	16.7	1.22272	-1.36414		F
E09PL1	Sylvia_atricapilla	19.6398	296	2.47129	0.0326009	16.7	1.22272	-1.36414		F
E11PL1	Sylvia_atricapilla	20.6181	351	2.54531	0.106616	16.7	1.22272	-1.36414		F
E15PL1	Sylvia_atricapilla	13.0302	378	2.57749	0.138801	16.7	1.22272	-1.36414		M
1	Mycteria_ibis	20.4392	268	2.42813	-0.0105561	2155.55	3.33356	0.746698	3.50137	M	0.183318
2	Mycteria_ibis	18.76	272	2.43457	-0.00412194	2155.55	3.33356	0.746698	1.37808	M	0.0721509
3	Mycteria_ibis	19.6021	241	2.38202	-0.0566738	2155.55	3.33356	0.746698	1.37808	F	0.0721509
4	Mycteria_ibis	18.5612	283	2.45179	0.0130956	2155.55	3.33356	0.746698	5.46301	M	0.286022
147	Tauraco_erythrolophus	19.7073	227	2.35603	-0.082665	261.24	2.41704	-0.169821	9.2274	F
H02PL2	Turdus_merula	12.4454	233	2.36736	-0.0713349	102.73	2.0117	-0.575163		F
H03PL1	Turdus_merula	15.6681	424	2.62737	0.188675	102.73	2.0117	-0.575163		F
H05PL2	Turdus_merula	15.4824	364	2.5611	0.122411	102.73	2.0117	-0.575163		M
H07PL1	Turdus_merula	16.2059	165	2.21748	-0.221207	102.73	2.0117	-0.575163		F
H10PL2	Turdus_merula	15.2433	326	2.51322	0.0745268	102.73	2.0117	-0.575163		M
47	Gyps_fulvus	25.497	244	2.38739	-0.051301	7435.99	3.87134	1.28448	5.33151	F	0.12878
48	Gyps_fulvus	23.6211	264	2.4216	-0.0170869	7435.99	3.87134	1.28448	9.26027	F	0.223678
49	Gyps_fulvus	24.8784	365	2.56229	0.123602	7435.99	3.87134	1.28448	10.411	F	0.251472
72	Gyps_fulvus	29.0895	368	2.56585	0.127157	7435.99	3.87134	1.28448	1.23014	F	0.0297135
73	Gyps_fulvus	30.1134	302	2.48001	0.0413161	7435.99	3.87134	1.28448	5.83014	M	0.140825
205 16D	Taeniopygia_guttata	20.2683	296	2.47129	0.0326009	12	1.07918	-1.50768	5.92055	M	0.408314
044 K18	Taeniopygia_guttata	18.3624	424	2.62737	0.188675	12	1.07918	-1.50768	4.29315	F	0.296079
059 K18	Taeniopygia_guttata	21.4542	436	2.63949	0.200796	12	1.07918	-1.50768	4.28767	M	0.295701
127 K18	Taeniopygia_guttata	22.0959	403	2.60531	0.166614	12	1.07918	-1.50768	4.1863	F	0.28871
119 S18	Taeniopygia_guttata	17.6866	358	2.55388	0.115192	12	1.07918	-1.50768	4.18356	F	0.288521
154	Taeniopygia_guttata	22.9867	407	2.60959	0.170904	12	1.07918	-1.50768	2.96438	M	0.20444
165	Taeniopygia_guttata	20.5688	397	2.59879	0.1601	12	1.07918	-1.50768	2.64384	M	0.182333
259 K19	Taeniopygia_guttata	17.8484	423	2.62634	0.18765	12	1.07918	-1.50768	3.17534	M	0.218989
27 16D	Taeniopygia_guttata	17.4715	328	2.51587	0.077183	12	1.07918	-1.50768	6.38082	F	0.440057
148 S18	Taeniopygia_guttata	22.6903	400	2.60206	0.163369	12	1.07918	-1.50768	4.12603	M	0.284554
129 K18	Taeniopygia_guttata	20.3497	367	2.56467	0.125975	12	1.07918	-1.50768	4.1863	F	0.28871
173 K19	Taeniopygia_guttata	21.7538	324	2.51055	0.0718542	12	1.07918	-1.50768	3.29315	M	0.227114
156	Taeniopygia_guttata	23.5249	404	2.60638	0.167691	12	1.07918	-1.50768	2.96438	M	0.20444
242 16D	Taeniopygia_guttata	19.4753	390	2.59106	0.152374	12	1.07918	-1.50768	5.80822	F	0.400567
234 16D	Taeniopygia_guttata	21.1221	378	2.57749	0.138801	12	1.07918	-1.50768	5.84384	M	0.403023
035 K18	Taeniopygia_guttata	18.2235	297	2.47276	0.0340656	12	1.07918	-1.50768	4.29863	F	0.296457
135 K19	Taeniopygia_guttata	21.4837	369	2.56703	0.128336	12	1.07918	-1.50768	3.30137	F	0.227681
088 K18	Taeniopygia_guttata	18.6354	436	2.63949	0.200796	12	1.07918	-1.50768	4.20548	F	0.290033
104 16D	Taeniopygia_guttata	21.8207	360	2.5563	0.117612	12	1.07918	-1.50768	6.25479	M	0.431365
235 16D	Taeniopygia_guttata	21.7822	470	2.6721	0.233407	12	1.07918	-1.50768	5.8411	F	0.402834
106 16D	Taeniopygia_guttata	19.2957	352	2.54654	0.107852	12	1.07918	-1.50768	6.24932	M	0.430987
073 K18	Taeniopygia_guttata	20.1023	340	2.53148	0.0927881	12	1.07918	-1.50768	4.27671	F	0.294946
127	Taeniopygia_guttata	20.5235	348	2.54158	0.102888	12	1.07918	-1.50768	3.03562	F	0.209353
139	Taeniopygia_guttata	18.7494	365	2.56229	0.123602	12	1.07918	-1.50768	2.96438	M	0.20444
151 K18	Taeniopygia_guttata	23.1801	322	2.50786	0.069165	12	1.07918	-1.50768	4.12603	M	0.284554
194 16D	Taeniopygia_guttata	17.0956	388	2.58883	0.150141	12	1.07918	-1.50768	5.94247	M	0.409825
121 K18	Taeniopygia_guttata	22.1648	380	2.57978	0.141093	12	1.07918	-1.50768	4.18904	M	0.288899
099 K18	Taeniopygia_guttata	19.8592	308	2.48855	0.0498599	12	1.07918	-1.50768	4.18904	F	0.288899
115 S18	Taeniopygia_guttata	18.8351	361	2.55751	0.118816	12	1.07918	-1.50768	4.1863	F	0.28871
10 16D	Taeniopygia_guttata	22.3765	461	2.6637	0.22501	12	1.07918	-1.50768	6.3863	F	0.440435
047 K18	Taeniopygia_guttata	17.7163	361	2.55751	0.118816	12	1.07918	-1.50768	4.29315	M	0.296079
196 16D	Taeniopygia_guttata	17.2228	401	2.60314	0.164454	12	1.07918	-1.50768	5.93699	M	0.409447
029 K18	Taeniopygia_guttata	17.9633	257	2.40993	-0.0287577	12	1.07918	-1.50768	4.29863	F	0.296457
4 16D	Taeniopygia_guttata	18.2649	321	2.50651	0.0678142	12	1.07918	-1.50768	6.39452	F	0.441001
618	Taeniopygia_guttata	18.4869	374	2.57287	0.134181	12	1.07918	-1.50768	4.11781	M	0.283987
173 16 D	Taeniopygia_guttata	18.3576	343	2.53529	0.0966033	12	1.07918	-1.50768	5.9863	F	0.412848
132 S18	Taeniopygia_guttata	22.8002	316	2.49969	0.0609962	12	1.07918	-1.50768	4.15068	F	0.286254
11 16D	Taeniopygia_guttata	18.5015	349	2.54283	0.104135	12	1.07918	-1.50768	6.3863	M	0.440435
119 K19	Taeniopygia_guttata	0	320	2.50515	0.0664591	12	1.07918	-1.50768	3.30411	F	0.22787
35	Taeniopygia_guttata	18.8735	466	2.66839	0.229695	12	1.07918	-1.50768	4.18082	F	0.288333
89 17 S	Taeniopygia_guttata	20.3156	387	2.58771	0.14902	12	1.07918	-1.50768	5.13699	F	0.354275
19	Taeniopygia_guttata	23.7195	330	2.51851	0.0798231	12	1.07918	-1.50768	5.87945	F	0.405479
37 16D	Taeniopygia_guttata	17.7545	340	2.53148	0.0927881	12	1.07918	-1.50768	6.3726	F	0.43949
1008	Taeniopygia_guttata	19.0777	418	2.62118	0.182485	12	1.07918	-1.50768	2.17808	M	0.150213
089 K18	Taeniopygia_guttata	20.6669	330	2.51851	0.0798231	12	1.07918	-1.50768	4.20274	F	0.289844
70 16D	Taeniopygia_guttata	25.9319	396	2.5977	0.159004	12	1.07918	-1.50768	6.28493	M	0.433444
137 K18	Taeniopygia_guttata	20.2817	345	2.53782	0.0991282	12	1.07918	-1.50768	4.17808	F	0.288144
022 K18	Taeniopygia_guttata	16.7818	300	2.47712	0.0384304	12	1.07918	-1.50768	4.29863	F	0.296457
107 S18	Taeniopygia_guttata	23.0915	369	2.56703	0.128336	12	1.07918	-1.50768	4.19452	F	0.289277
010 K18	Taeniopygia_guttata	15.544	346	2.53908	0.100385	12	1.07918	-1.50768	4.30137	M	0.296646
053 K18	Taeniopygia_guttata	24.4094	374	2.57287	0.134181	12	1.07918	-1.50768	4.29041	F	0.29589
220 16 D	Taeniopygia_guttata	19.5062	333	2.52244	0.0837534	12	1.07918	-1.50768	5.87671	M	0.405291
049 K18	Taeniopygia_guttata	25.5877	345	2.53782	0.0991282	12	1.07918	-1.50768	4.29041	M	0.29589
109 S18	Taeniopygia_guttata	22.6278	423	2.62634	0.18765	12	1.07918	-1.50768	4.18904	M	0.288899
78 16D	Taeniopygia_guttata	0	393	2.59439	0.155702	12	1.07918	-1.50768	6.27397	M	0.432688
102	Taeniopygia_guttata	16.9614	359	2.55509	0.116404	12	1.07918	-1.50768		F
147	Taeniopygia_guttata	0	312	2.49415	0.0554637	12	1.07918	-1.50768	2.96438	M	0.20444
840	Taeniopygia_guttata	0	356	2.55145	0.112759	12	1.07918	-1.50768	3.75616	M	0.259046
S520F/008	Taeniopygia_guttata	0	309	2.48996	0.0512676	12	1.07918	-1.50768		F
1052	Taeniopygia_guttata	21.3134	398	2.59988	0.161192	12	1.07918	-1.50768	2.15068	M	0.148323

## Sheet: Species list
Species (88)	Species glucose (75)	Species LH (66)	Species LH individuals (58)	Species Age+sex (49)
Phoenicopterus_ruber	Phoenicopterus_ruber	Phoenicopterus_ruber	Phoenicopterus_ruber	Phoenicopterus_ruber
Phoenicopterus_roseus	Aythya_baeri	Phoenicopterus_roseus	Dendrocygna_viduata	Aythya_baeri
Aythya_baeri	Dendrocygna_viduata	Casuarius_casuarius	Anas_bernieri	Dendrocygna_viduata
Casuarius_casuarius	Anas_bernieri	Dendrocygna_viduata	Branta_hutchinsii	Anas_bernieri
Dendrocygna_viduata	Branta_hutchinsii	Anas_bernieri	Anas_platyrhynchos	Branta_hutchinsii
Anas_bernieri	Anas_platyrhynchos	Dendrocygna_eytoni	Dendrocygna_bicolor	Anas_platyrhynchos
Dendrocygna_eytoni	Dendrocygna_bicolor	Branta_hutchinsii	Chen_canagica	Dendrocygna_bicolor
Branta_hutchinsii	Aratinga_auricapillus	Anas_platyrhynchos	Phalacrocorax_campbelli	Aratinga_auricapillus
Anas_platyrhynchos	Chen_canagica	Dendrocygna_bicolor	Platalea_ajaja	Chen_canagica
Dendrocygna_bicolor	Phalacrocorax_campbelli	Chen_canagica	Tachymarptis_melba	Platalea_ajaja
Aratinga_auricapillus	Platalea_ajaja	Phalacrocorax_campbelli	Sarkidiornis_melanotos	Tachymarptis_melba
Chen_canagica	Tachymarptis_melba	Platalea_ajaja	Branta_leucopsis	Sarkidiornis_melanotos
Phalacrocorax_campbelli	Sarkidiornis_melanotos	Tachymarptis_melba	Procellaria_aequinoctialis	Branta_leucopsis
Platalea_ajaja	Branta_leucopsis	Sarkidiornis_melanotos	Turdus_merula	Ara_ambiguus
Tachymarptis_melba	Ara_ambiguus	Branta_leucopsis	Aptenodytes_patagonicus	Ara_militaris
Sarkidiornis_melanotos	Procellaria_aequinoctialis	Procellaria_aequinoctialis	Pagodroma_nivea	Anodorhynchus_hyacinthinus
Branta_leucopsis	Ara_militaris	Turdus_merula	Cygnus_atratus	Lophotibis_cristata
Ara_ambiguus	Anodorhynchus_hyacinthinus	Aptenodytes_patagonicus	Sylvia_atricapilla	Pagodroma_nivea
Procellaria_aequinoctialis	Turdus_merula	Pagodroma_nivea	Eudyptes_chrysolophus	Cygnus_atratus
Ara_militaris	Aptenodytes_patagonicus	Cygnus_atratus	Eudocimus_ruber	Eudocimus_ruber
Anodorhynchus_hyacinthinus	Lophotibis_cristata	Sylvia_atricapilla	Sylvia_borin	Anser_anser
Zenaida_graysoni	Pagodroma_nivea	Eudyptes_chrysolophus	Sylvia_communis	Lophura_edwardsi
Turdus_merula	Cygnus_atratus	Cacatua_moluccensis	Anser_anser	Bucorvus_abyssinicus
Aptenodytes_patagonicus	Sylvia_atricapilla	Eudocimus_ruber	Erithacus_rubecula	Leptoptilos_crumeniferus
Lophotibis_cristata	Eudyptes_chrysolophus	Sylvia_borin	Bucorvus_abyssinicus	Balearica_pavonina
Pagodroma_nivea	Eudocimus_ruber	Sylvia_communis	Macronectes_halli	Ara_glaucogularis
Cygnus_atratus	Sylvia_borin	Anser_anser	Numida_meleagris	Nesoenas_mayeri
Sylvia_atricapilla	Sylvia_communis	Erithacus_rubecula	Leptoptilos_crumeniferus	Acryllium_vulturinum
Eudyptes_chrysolophus	Anser_anser	Bucorvus_abyssinicus	Balearica_pavonina	Pelecanus_onocrotalus
Cacatua_moluccensis	Anser_indicus	Macronectes_halli	Acryllium_vulturinum	Leucopsar_rothschildi
Eudocimus_ruber	Lophura_edwardsi	Numida_meleagris	Pelecanus_onocrotalus	Mycteria_ibis
Sylvia_borin	Erithacus_rubecula	Leptoptilos_crumeniferus	Sterna_nilotica	Bubo_scandiaca
Sylvia_communis	Bucorvus_abyssinicus	Balearica_pavonina	Larus_dominicanus	Caloenas_nicobarica
Anser_anser	Macronectes_halli	Acryllium_vulturinum	Leucopsar_rothschildi	Aegypius_monachus
Anser_indicus	Numida_meleagris	Pelecanus_onocrotalus	Pygoscelis_papua	Pelecanus_crispus
Lophura_edwardsi	Leptoptilos_crumeniferus	Sterna_nilotica	Chionis_minor	Bucorvus_cafer
Erithacus_rubecula	Balearica_pavonina	Larus_dominicanus	Mycteria_ibis	Geronticus_eremita
Bucorvus_abyssinicus	Ara_glaucogularis	Leucopsar_rothschildi	Bubo_scandiaca	Burhinus_grallarius
Burhinus_superciliaris	Ortalis_canicollis	Pygoscelis_papua	Acrocephalus_scirpaceus	Balearica_regulorum
Macronectes_halli	Nesoenas_mayeri	Chionis_minor	Aegypius_monachus	Ciconia_nigra
Numida_meleagris	Acryllium_vulturinum	Mycteria_ibis	Limosa_limosa	Neophron_percnopterus
Leptoptilos_crumeniferus	Pelecanus_onocrotalus	Musophaga_rossae	Catharacta_antarctica	Rhea_pennata
Balearica_pavonina	Sterna_nilotica	Bubo_bubo	Pelecanus_crispus	Ciconia_abdimii
Ara_glaucogularis	Larus_dominicanus	Acrocephalus_scirpaceus	Bucorvus_cafer	Dacelo_novaeguineae
Ortalis_canicollis	Leucopsar_rothschildi	Aegypius_monachus	Geronticus_eremita	Grus_paradisea
Nesoenas_mayeri	Lophophorus_impejanus	Vanellus_miles	Burhinus_grallarius	Grus_virgo
Acryllium_vulturinum	Pygoscelis_papua	Limosa_limosa	Balearica_regulorum	Gyps_fulvus
Pelecanus_onocrotalus	Chionis_minor	Catharacta_antarctica	Ciconia_nigra	Taeniopygia_guttata
Sterna_nilotica	Mycteria_ibis	Pelecanus_crispus	Neophron_percnopterus	Branta_ruficollis
Larus_dominicanus	Bubo_scandiaca	Chauna_torquata	Ciconia_abdimii
Leucopsar_rothschildi	Acrocephalus_scirpaceus	Bucorvus_cafer	Dacelo_novaeguineae
Lophophorus_impejanus	Caloenas_nicobarica	Geronticus_eremita	Grus_paradisea
Pygoscelis_papua	Aegypius_monachus	Burhinus_grallarius	Grus_virgo
Chionis_minor	Limosa_limosa	Balearica_regulorum	Gyps_fulvus
Mycteria_ibis	Catharacta_antarctica	Ciconia_nigra	Calonectris_diomedea
Musophaga_rossae	Pelecanus_crispus	Neophron_percnopterus	Macronectes_giganteus
Bubo_bubo	Cariama_cristata	Ciconia_abdimii	Taeniopygia_guttata
Acrocephalus_scirpaceus	Bucorvus_cafer	Dacelo_novaeguineae	Branta_ruficollis
Caloenas_nicobarica	Geronticus_eremita	Grus_paradisea
Aegypius_monachus	Burhinus_grallarius	Grus_virgo
Vanellus_miles	Balearica_regulorum	Gyps_fulvus
Limosa_limosa	Psophia_crepitans	Calonectris_diomedea
Catharacta_antarctica	Tauraco_erythrolophus	Macronectes_giganteus
Pelecanus_crispus	Ciconia_nigra	Taeniopygia_guttata
Chauna_torquata	Neophron_percnopterus	Branta_ruficollis
Cariama_cristata	Rhea_pennata	Bubo_scandiaca
Bucorvus_cafer	Ciconia_abdimii
Geronticus_eremita	Dacelo_novaeguineae
Burhinus_grallarius	Grus_paradisea
Balearica_regulorum	Grus_virgo
Psophia_crepitans	Gyps_fulvus
Tauraco_erythrolophus	Calonectris_diomedea
Ciconia_nigra	Macronectes_giganteus
Ducula_bicolor	Taeniopygia_guttata
Neophron_percnopterus	Branta_ruficollis
Rhea_pennata
Ciconia_abdimii
Dacelo_novaeguineae
Grus_paradisea
Grus_virgo
Gyps_fulvus
Calonectris_diomedea
Macronectes_giganteus
Taeniopygia_guttata
Tauraco_fischeri
Tauraco_leucolophus
Branta_ruficollis
Bubo_scandiaca
